# Supplementary material for: Complete Genomic Characterization of a Pathogenic A.II Strain of Francisella tularensis Subspecies tularensis
Source: PLoS One. 2007 Sep 26;2(9):e947. doi: 10.1371/journal.pone.0000947 (PMC1978527; doi:10.1371/journal.pone.0000947)
Supplement: Table S5 — Duplicated Region SNPs in Francisella tularensis subsp. tularensis WY96 vs Schu S4 Duplicated Regions. (0.06 MB XLS) [file pone.0000947.s005.xls]

## Sheet: Table S6
Table S6. Duplicated Region SNPs in Francisella tularensis subsp. tularensis WY96 vs Schu S4 Duplicated Regions
		Schu S4	Schu S4	WY96	Schu S4	WY96	Schu S4	WY96	Schu S4 DR	WY96	AA		WY96				WY96	WY96
SNP ID	SNP Type	DR	DR pos	pos	DR nuc	nuc	DR AA	AA	AA Properties	AA Properties	Change Type	Type	Locus Tag	Product	Gene	Strand	Feature Start	Feature End
DR1-SNP1	nSNP	Schu4-DR1	33827	27254	C	A	K	N	polar, hydrophilic, charged (+)	polar, hydrophilic, neutral	Non-Conservative	CDS	FTW_0033	transposase ISFtu1(programmed frameshift)	N\A	template	27236	27565
DR1-SNP2	sSNP	Schu4-DR1	33800	27281	G	A	N	N	polar, hydrophilic, neutral	polar, hydrophilic, neutral	Conservative	CDS	FTW_0033	transposase ISFtu1(programmed frameshift)	N\A	template	27236	27565
DR1-SNP3	nSNP	Schu4-DR1	33275	27806	A	G	L	P	aliphatic, hydrophobic, neutral	hydrophobic, neutral	Non-Conservative	CDS	FTW_0033	transposase ISFtu1(programmed frameshift)	N\A	template	27565	28116
DR1-SNP4	nSNP	Schu4-DR1	33262	27819	G	A	R	W	polar, hydrophilic, charged (+)	aromatic, hydrophobic, neutral	Non-Conservative	CDS	FTW_0033	transposase ISFtu1(programmed frameshift)	N\A	template	27565	28116
DR1-SNP5	nSNP	Schu4-DR1	33094	27987	G	A	L	F	aliphatic, hydrophobic, neutral	aromatic, hydrophobic, neutral	Non-Conservative	CDS	FTW_0033	transposase ISFtu1(programmed frameshift)	N\A	template	27565	28116
DR1-SNP6	nSNP	Schu4-DR1	33062	28019	T	C	*	W	Stop	aromatic, hydrophobic, neutral	UnStop	CDS	FTW_0033	transposase ISFtu1(programmed frameshift)	N\A	template	27565	28116
DR1-SNP7	sSNP	Schu4-DR1	32976	28105	A	G	Y	Y	aromatic, polar, hydrophobic	aromatic, polar, hydrophobic	Conservative	CDS	FTW_0033	transposase ISFtu1(programmed frameshift)	N\A	template	27565	28116
DR1-SNP8	sSNP	Schu4-DR1	32725	28356	T	C	F	F	aromatic, hydrophobic, neutral	aromatic, hydrophobic, neutral	Conservative	Gene	FTW_0035	Putative membrane transporter	N/A	template
DR1-SNP9	nSNP	Schu4-DR1	32429	28652	A	C	Y	S	aromatic, polar, hydrophobic	polar, hydrophilic, neutral	Non-Conservative	Gene	FTW_0035	Putative membrane transporter	N/A	template
DR1-SNP10	pINDEL	Schu4-DR1	32236	28844	G	.				Frameshift disruption	Pseudogene INDEL	Gene	FTW_0035	Putative membrane transporter	N/A	template
DR1-SNP11	nSNP	Schu4-DR1	31779	29301	A	C	Y	*	aromatic, polar, hydrophobic	Stop	Stop	CDS	FTW_0036	conserved hypothetical protein	N/A	template
DR1-SNP12	sSNP	Schu4-DR1	31353	29727	A	C	R	R	polar, hydrophilic, charged (+)	polar, hydrophilic, charged (+)	Conservative	CDS	FTW_0036	conserved hypothetical protein	N/A	template
DR1-SNP13	iSNP	Schu4-DR1	30729	30351	C	T					Intergenic
DR1-SNP14	nSNP	Schu4-DR1	30688	30392	G	A	R	*	polar, hydrophilic, charged (+)	Stop	Stop	CDS	FTW_0037	pathogenicity determinant protein D, pdpD	pdpD1	template	30375	33962
DR1-SNP15	nSNP	Schu4-DR1	29641	31439	T	A	I	F	aliphatic, hydrophobic, neutral	aromatic, hydrophobic, neutral	Non-Conservative	CDS	FTW_0037	pathogenicity determinant protein D, pdpD	pdpD1	template	30375	33962
DR1-SNP16	nSNP	Schu4-DR1	29020	32060	T	C	R	G	polar, hydrophilic, charged (+)	aliphatic, neutral	Non-Conservative	CDS	FTW_0037	pathogenicity determinant protein D, pdpD	pdpD1	template	30375	33962
DR1-SNP17	sSNP	Schu4-DR1	27777	33303	G	A	G	G	aliphatic, neutral	aliphatic, neutral	Conservative	CDS	FTW_0037	pathogenicity determinant protein D, pdpD	pdpD1	template	30375	33962
DR1-SNP18	sSNP	Schu4-DR1	26555	34525	G	A	L	L	aliphatic, hydrophobic, neutral	aliphatic, hydrophobic, neutral	Conservative	CDS	FTW_0038	intracellular growth locus, igl A	iglA1	template	34043	34597
DR1-SNP19	nSNP	Schu4-DR1	25444	35636	G	A	R	C	polar, hydrophilic, charged (+)	sulfur-containing, polar, hydrophobic, neutral	Non-Conservative	CDS	FTW_0039	intracellular growth locus B, IglB	iglB1	template	34611	36131
DR1-SNP20	sSNP	Schu4-DR1	25086	35994	C	T	L	L	aliphatic, hydrophobic, neutral	aliphatic, hydrophobic, neutral	Conservative	CDS	FTW_0039	intracellular growth locus B, IglB	iglB1	template	34611	36131
DR1-SNP21	nSNP	Schu4-DR1	24771	36309	A	C	W	G	aromatic, hydrophobic, neutral	aliphatic, neutral	Non-Conservative	CDS	FTW_0040	intracellular growth locus iglC	iglC1	template	36142	36777
DR1-SNP22	nSNP	Schu4-DR1	24417	36663	T	A	I	L	aliphatic, hydrophobic, neutral	aliphatic, hydrophobic, neutral	Conservative	CDS	FTW_0040	intracellular growth locus iglC	iglC1	template	36142	36777
DR1-SNP23	nSNP	Schu4-DR1	24372	36708	A	G	F	L	aromatic, hydrophobic, neutral	aliphatic, hydrophobic, neutral	Non-Conservative	CDS	FTW_0040	intracellular growth locus iglC	iglC1	template	36142	36777
DR1-SNP24	nSNP	Schu4-DR1	23636	37444	T	G	Y	S	aromatic, polar, hydrophobic	polar, hydrophilic, neutral	Non-Conservative	CDS	FTW_0041	intracellular growth locus iglD	iglD1	template	36798	37994
DR1-SNP25	nSNP	Schu4-DR1	23043	38037	C	T	P	S	hydrophobic, neutral	polar, hydrophilic, neutral	Non-Conservative	CDS	FTW_0042	hypothetical protein	N\A	complement	38001	38576
DR1-SNP26	nSNP	Schu4-DR1	22583	38497	T	C	I	T	aliphatic, hydrophobic, neutral	polar, hydrophilic, neutral	Non-Conservative	CDS	FTW_0042	hypothetical protein	N\A	complement	38001	38576
DR1-SNP27	nSNP	Schu4-DR1	22136	38944	C	A	N	K	polar, hydrophilic, neutral	polar, hydrophilic, charged (+)	Non-Conservative	CDS	FTW_0043	pathogenicity determinant protein pdpC	pdpC1	complement	38594	42580
DR1-SNP28	nSNP	Schu4-DR1	21662	39418	G	A	M	I	sulfur-containing, hydrophobic, neutral	aliphatic, hydrophobic, neutral	Non-Conservative	CDS	FTW_0043	pathogenicity determinant protein pdpC	pdpC1	complement	38594	42580
DR1-SNP29	nSNP	Schu4-DR1	21111	39969	A	C	Y	S	aromatic, polar, hydrophobic	polar, hydrophilic, neutral	Non-Conservative	CDS	FTW_0043	pathogenicity determinant protein pdpC	pdpC1	complement	38594	42580
DR1-SNP30	nSNP	Schu4-DR1	21063	40017	A	G	H	R	aromatic, polar, hydrophilic, charged (+)	polar, hydrophilic, charged (+)	Non-Conservative	CDS	FTW_0043	pathogenicity determinant protein pdpC	pdpC1	complement	38594	42580
DR1-SNP31	nSNP	Schu4-DR1	20092	40988	T	C	F	L	aromatic, hydrophobic, neutral	aliphatic, hydrophobic, neutral	Non-Conservative	CDS	FTW_0043	pathogenicity determinant protein pdpC	pdpC1	complement	38594	42580
DR1-SNP32	nSNP	Schu4-DR1	19466	41614	T	G	N	K	polar, hydrophilic, neutral	polar, hydrophilic, charged (+)	Non-Conservative	CDS	FTW_0043	pathogenicity determinant protein pdpC	pdpC1	complement	38594	42580
DR1-SNP33	sSNP	Schu4-DR1	19370	41710	G	A	*	*	Stop	Stop	Conservative Stop	CDS	FTW_0043	pathogenicity determinant protein pdpC	pdpC1	complement	38594	42580
DR1-SNP34	nSNP	Schu4-DR1	19285	41795	C	T	R	*	polar, hydrophilic, charged (+)	Stop	Stop	CDS	FTW_0043	pathogenicity determinant protein pdpC	pdpC1	complement	38594	42580
DR1-SNP35	nSNP	Schu4-DR1	18680	42400	G	T	E	D	polar, hydrophilic, charged (-)	polar, hydrophilic, charged (-)	Conservative	CDS	FTW_0043	pathogenicity determinant protein pdpC	pdpC1	complement	38594	42580
DR1-SNP36	nSNP	Schu4-DR1	18663	42417	G	A	C	Y	sulfur-containing, polar, hydrophobic, neutral	aromatic, polar, hydrophobic	Non-Conservative	CDS	FTW_0043	pathogenicity determinant protein pdpC	pdpC1	complement	38594	42580
DR1-SNP37	nSNP	Schu4-DR1	18004	43076	G	A	D	N	polar, hydrophilic, charged (-)	polar, hydrophilic, neutral	Non-Conservative	CDS	FTW_0044	hypothetical protein	N\A	complement	42620	43336
DR1-SNP38	sSNP	Schu4-DR1	16987	44093	G	A	*	*	Stop	Stop	Conservative Stop	CDS	FTW_0045	hypothetical protein	N\A	complement	43359	44510
DR1-SNP39	sSNP	Schu4-DR1	15676	45404	C	T	H	H	aromatic, polar, hydrophilic, charged (+)	aromatic, polar, hydrophilic, charged (+)	Conservative	CDS	FTW_0047	hypothetical protein	N\A	complement	45168	46598
DR1-SNP40	sSNP	Schu4-DR1	15172	45908	C	T	T	T	polar, hydrophilic, neutral	polar, hydrophilic, neutral	Conservative	CDS	FTW_0047	hypothetical protein	N\A	complement	45168	46598
DR1-SNP41	nSNP	Schu4-DR1	14669	46411	G	A	S	N	polar, hydrophilic, neutral	polar, hydrophilic, neutral	Conservative	CDS	FTW_0047	hypothetical protein	N\A	complement	45168	46598
DR1-SNP42	sSNP	Schu4-DR1	14641	46439	A	G	S	S	polar, hydrophilic, neutral	polar, hydrophilic, neutral	Conservative	CDS	FTW_0047	hypothetical protein	N\A	complement	45168	46598
DR1-SNP43	nSNP	Schu4-DR1	14602	46478	G	A	M	I	sulfur-containing, hydrophobic, neutral	aliphatic, hydrophobic, neutral	Non-Conservative	CDS	FTW_0047	hypothetical protein	N\A	complement	45168	46598
DR1-SNP44	nSNP	Schu4-DR1	13788	47292	A	G	S	G	polar, hydrophilic, neutral	aliphatic, neutral	Non-Conservative	CDS	FTW_0049	hypothetical protein	N\A	complement	47133	48863
DR1-SNP45	sSNP	Schu4-DR1	13324	47756	C	T	S	S	polar, hydrophilic, neutral	polar, hydrophilic, neutral	Conservative	CDS	FTW_0049	hypothetical protein	N\A	complement	47133	48863
DR1-SNP46	nSNP	Schu4-DR1	12857	48223	A	C	N	T	polar, hydrophilic, neutral	polar, hydrophilic, neutral	Conservative	CDS	FTW_0049	hypothetical protein	N\A	complement	47133	48863
DR1-SNP47	sSNP	Schu4-DR1	11832	49248	A	T	I	I	aliphatic, hydrophobic, neutral	aliphatic, hydrophobic, neutral	Conservative	CDS	FTW_0050	hypothetical protein	N\A	complement	48868	49362
DR1-SNP48	nSNP	Schu4-DR1	11828	49252	T	G	S	A	polar, hydrophilic, neutral	aliphatic, hydrophobic, neutral	Non-Conservative	CDS	FTW_0050	hypothetical protein	N\A	complement	48868	49362
DR1-SNP49	nSNP	Schu4-DR1	11827	49253	C	A	T	N	polar, hydrophilic, neutral	polar, hydrophilic, neutral	Conservative	CDS	FTW_0050	hypothetical protein	N\A	complement	48868	49362
DR1-SNP50	sSNP	Schu4-DR1	10019	51061	G	A	R	R	polar, hydrophilic, charged (+)	polar, hydrophilic, charged (+)	Conservative	CDS	FTW_0052	pathogenicity deteminant protein pdpB1	pdpB1	complement	49742	53023
DR1-SNP51	sSNP	Schu4-DR1	10004	51076	A	G	S	S	polar, hydrophilic, neutral	polar, hydrophilic, neutral	Conservative	CDS	FTW_0052	pathogenicity deteminant protein pdpB1	pdpB1	complement	49742	53023
DR1-SNP52	nSNP	Schu4-DR1	9292	51788	G	T	V	L	aliphatic, hydrophobic, neutral	aliphatic, hydrophobic, neutral	Conservative	CDS	FTW_0052	pathogenicity deteminant protein pdpB1	pdpB1	complement	49742	53023
DR1-SNP53	nSNP	Schu4-DR1	8836	52244	C	A	Q	K	polar, hydrophilic, neutral	polar, hydrophilic, charged (+)	Non-Conservative	CDS	FTW_0052	pathogenicity deteminant protein pdpB1	pdpB1	complement	49742	53023
DR1-SNP54	nSNP	Schu4-DR1	8779	52301	C	T	H	Y	aromatic, polar, hydrophilic, charged (+)	aromatic, polar, hydrophobic	Non-Conservative	CDS	FTW_0052	pathogenicity deteminant protein pdpB1	pdpB1	complement	49742	53023
DR1-SNP55	nSNP	Schu4-DR1	8748	52332	G	T	W	L	aromatic, hydrophobic, neutral	aliphatic, hydrophobic, neutral	Non-Conservative	CDS	FTW_0052	pathogenicity deteminant protein pdpB1	pdpB1	complement	49742	53023
DR1-SNP56	sSNP	Schu4-DR1	8474	52606	A	G	P	P	hydrophobic, neutral	hydrophobic, neutral	Conservative	CDS	FTW_0052	pathogenicity deteminant protein pdpB1	pdpB1	complement	49742	53023
DR1-SNP57	sSNP	Schu4-DR1	7096	53984	G	A	L	L	aliphatic, hydrophobic, neutral	aliphatic, hydrophobic, neutral	Conservative	CDS	FTW_0053	pathogenicity deteminant protein pdpA1	pdpA1	complement	53028	55490
DR1-SNP58	rSNP	Schu4-DR1	5093	55987	G	A					Ribosomal SNP	Gene	FTW_2069	16S_rRNA	N/A	template
DR1-SNP59	rSNP	Schu4-DR1	2472	58609	T	C					Ribosomal SNP	Gene	FTW_2066	23S_rRNA	N/A	template
DR1-SNP60	rSNP	Schu4-DR1	1222	59859	C	T					Ribosomal SNP	Gene	FTW_2066	23S_rRNA	N/A	template
DR1-SNP61	iSNP	Schu4-DR1	194	60887	C	A					Intergenic	Gene
DR2-SNP1	nSNP	Schu4-DR2	33827	516967	C	A	K	N	polar, hydrophilic, charged (+)	polar, hydrophilic, neutral	Non-Conservative	CDS	FTW_0530	transposase ISFtu1 (programmed frameshift)	N\A	template	516949	517278
DR2-SNP2	sSNP	Schu4-DR2	33800	516994	G	A	N	N	polar, hydrophilic, neutral	polar, hydrophilic, neutral	Conservative	CDS	FTW_0530	transposase ISFtu1 (programmed frameshift)	N\A	template	516949	517278
DR2-SNP3	nSNP	Schu4-DR2	33275	517519	A	G	L	P	aliphatic, hydrophobic, neutral	hydrophobic, neutral	Non-Conservative	CDS	FTW_0530	transposase ISFtu1 (programmed frameshift)	N\A	template	517278	517829
DR2-SNP4	nSNP	Schu4-DR2	33262	517532	G	A	R	W	polar, hydrophilic, charged (+)	aromatic, hydrophobic, neutral	Non-Conservative	CDS	FTW_0530	transposase ISFtu1 (programmed frameshift)	N\A	template	517278	517829
DR2-SNP5	nSNP	Schu4-DR2	33094	517700	G	A	L	F	aliphatic, hydrophobic, neutral	aromatic, hydrophobic, neutral	Non-Conservative	CDS	FTW_0530	transposase ISFtu1 (programmed frameshift)	N\A	template	517278	517829
DR2-SNP6	nSNP	Schu4-DR2	33062	517732	T	C	*	W	Stop	aromatic, hydrophobic, neutral	UnStop	CDS	FTW_0530	transposase ISFtu1 (programmed frameshift)	N\A	template	517278	517829
DR2-SNP7	sSNP	Schu4-DR2	32976	517818	A	G	Y	Y	aromatic, polar, hydrophobic	aromatic, polar, hydrophobic	Conservative	CDS	FTW_0530	transposase ISFtu1 (programmed frameshift)	N\A	template	517278	517829
DR2-SNP8	sSNP	Schu4-DR2	32725	518069	T	C	F	F	aromatic, hydrophobic, neutral	aromatic, hydrophobic, neutral	Intergenic	Gene	FTW_0532	major facilitator family transporter	N/A	template
DR2-SNP9	nSNP	Schu4-DR2	32429	518365	A	C	Y	S	aromatic, polar, hydrophobic	polar, hydrophilic, neutral	Non-Conservative	Gene	FTW_0532	major facilitator family transporter	N/A	template
DR2-SNP10	pINDEL	Schu4-DR2	32236	518557	G	.				Frameshift disruption	Pseudogene INDEL	Gene	FTW_0532	major facilitator family transporter	N/A	template
DR2-SNP11	nSNP	Schu4-DR2	31779	519014	A	C	Y	*	aromatic, polar, hydrophobic	Stop	Stop	CDS	FTW_0533	conserved hypothetical protein	N\A	template	518843	519856
DR2-SNP12	sSNP	Schu4-DR2	31353	519440	A	C	R	R	polar, hydrophilic, charged (+)	polar, hydrophilic, charged (+)	Conservative	CDS	FTW_0533	conserved hypothetical protein	N\A	template	518843	519856
DR2-SNP13	iSNP	Schu4-DR2	30729	520064	C	T					Intergenic
DR2-SNP14	nSNP	Schu4-DR2	30688	520105	G	A	R	*	polar, hydrophilic, charged (+)	Stop	Stop	CDS	FTW_0534	pathogenicity determinant protein D, pdpD	pdpD2	template	520088	523675
DR2-SNP15	nSNP	Schu4-DR2	29641	521152	T	A	I	F	aliphatic, hydrophobic, neutral	aromatic, hydrophobic, neutral	Non-Conservative	CDS	FTW_0534	pathogenicity determinant protein D, pdpD	pdpD2	template	520088	523675
DR2-SNP16	nSNP	Schu4-DR2	29020	521773	T	C	R	G	polar, hydrophilic, charged (+)	aliphatic, neutral	Non-Conservative	CDS	FTW_0534	pathogenicity determinant protein D, pdpD	pdpD2	template	520088	523675
DR2-SNP17	sSNP	Schu4-DR2	27777	523016	G	A	G	G	aliphatic, neutral	aliphatic, neutral	Conservative	CDS	FTW_0534	pathogenicity determinant protein D, pdpD	pdpD2	template	520088	523675
DR2-SNP18	sSNP	Schu4-DR2	26555	524238	G	A	L	L	aliphatic, hydrophobic, neutral	aliphatic, hydrophobic, neutral	Conservative	CDS	FTW_0535	intracellular growth locus, iglA	iglA2	template	523756	524310
DR2-SNP19	nSNP	Schu4-DR2	25444	525349	G	A	R	C	polar, hydrophilic, charged (+)	sulfur-containing, polar, hydrophobic, neutral	Non-Conservative	CDS	FTW_0536	intracellular growth locus iglB	iglB2	template	524324	525844
DR2-SNP20	sSNP	Schu4-DR2	25086	525707	C	T	L	L	aliphatic, hydrophobic, neutral	aliphatic, hydrophobic, neutral	Conservative	CDS	FTW_0536	intracellular growth locus iglB	iglB2	template	524324	525844
DR2-SNP21	nSNP	Schu4-DR2	24771	526022	A	C	W	G	aromatic, hydrophobic, neutral	aliphatic, neutral	Non-Conservative	CDS	FTW_0537	Intracellular growth locus iglC	iglC2	template	525855	526490
DR2-SNP22	nSNP	Schu4-DR2	24417	526376	T	A	I	L	aliphatic, hydrophobic, neutral	aliphatic, hydrophobic, neutral	Conservative	CDS	FTW_0537	Intracellular growth locus iglC	iglC2	template	525855	526490
DR2-SNP23	nSNP	Schu4-DR2	24372	526421	A	G	F	L	aromatic, hydrophobic, neutral	aliphatic, hydrophobic, neutral	Non-Conservative	CDS	FTW_0537	Intracellular growth locus iglC	iglC2	template	525855	526490
DR2-SNP24	nSNP	Schu4-DR2	23636	527157	T	G	Y	S	aromatic, polar, hydrophobic	polar, hydrophilic, neutral	Non-Conservative	CDS	FTW_0538	intracellular growth locus iglD	iglD2	template	526511	527707
DR2-SNP25	nSNP	Schu4-DR2	23043	527750	C	T	P	S	hydrophobic, neutral	polar, hydrophilic, neutral	Non-Conservative	CDS	FTW_0539	hypothetical protein	N\A	complement	527714	528289
DR2-SNP26	nSNP	Schu4-DR2	22583	528210	T	C	I	T	aliphatic, hydrophobic, neutral	polar, hydrophilic, neutral	Non-Conservative	CDS	FTW_0539	hypothetical protein	N\A	complement	527714	528289
DR2-SNP27	nSNP	Schu4-DR2	22136	528657	C	A	N	K	polar, hydrophilic, neutral	polar, hydrophilic, charged (+)	Non-Conservative	CDS	FTW_0540	pathogenicity determinant protein pdpC2	pdpC2	complement	528307	532293
DR2-SNP28	nSNP	Schu4-DR2	21662	529131	G	A	M	I	sulfur-containing, hydrophobic, neutral	aliphatic, hydrophobic, neutral	Non-Conservative	CDS	FTW_0540	pathogenicity determinant protein pdpC2	pdpC2	complement	528307	532293
DR2-SNP29	nSNP	Schu4-DR2	21111	529682	A	C	Y	S	aromatic, polar, hydrophobic	polar, hydrophilic, neutral	Non-Conservative	CDS	FTW_0540	pathogenicity determinant protein pdpC2	pdpC2	complement	528307	532293
DR2-SNP30	nSNP	Schu4-DR2	21063	529730	A	G	H	R	aromatic, polar, hydrophilic, charged (+)	polar, hydrophilic, charged (+)	Non-Conservative	CDS	FTW_0540	pathogenicity determinant protein pdpC2	pdpC2	complement	528307	532293
DR2-SNP31	nSNP	Schu4-DR2	20092	530701	T	C	F	L	aromatic, hydrophobic, neutral	aliphatic, hydrophobic, neutral	Non-Conservative	CDS	FTW_0540	pathogenicity determinant protein pdpC2	pdpC2	complement	528307	532293
DR2-SNP32	nSNP	Schu4-DR2	19466	531327	T	G	N	K	polar, hydrophilic, neutral	polar, hydrophilic, charged (+)	Non-Conservative	CDS	FTW_0540	pathogenicity determinant protein pdpC2	pdpC2	complement	528307	532293
DR2-SNP33	sSNP	Schu4-DR2	19370	531423	G	A	*	*	Stop	Stop	Conservative Stop	CDS	FTW_0540	pathogenicity determinant protein pdpC2	pdpC2	complement	528307	532293
DR2-SNP34	nSNP	Schu4-DR2	19285	531508	C	T	R	*	polar, hydrophilic, charged (+)	Stop	Stop	CDS	FTW_0540	pathogenicity determinant protein pdpC2	pdpC2	complement	528307	532293
DR2-SNP35	nSNP	Schu4-DR2	18680	532113	G	T	E	D	polar, hydrophilic, charged (-)	polar, hydrophilic, charged (-)	Conservative	CDS	FTW_0540	pathogenicity determinant protein pdpC2	pdpC2	complement	528307	532293
DR2-SNP36	nSNP	Schu4-DR2	18663	532130	G	A	C	Y	sulfur-containing, polar, hydrophobic, neutral	aromatic, polar, hydrophobic	Non-Conservative	CDS	FTW_0540	pathogenicity determinant protein pdpC2	pdpC2	complement	528307	532293
DR2-SNP37	nSNP	Schu4-DR2	18004	532789	G	A	D	N	polar, hydrophilic, charged (-)	polar, hydrophilic, neutral	Non-Conservative	CDS	FTW_0541	hypothetical protein	N\A	complement	532333	533049
DR2-SNP38	sSNP	Schu4-DR2	16987	533806	G	A	*	*	Stop	Stop	Conservative Stop	CDS	FTW_0542	hypothetical protein	N\A	complement	533072	534223
DR2-SNP39	sSNP	Schu4-DR2	15676	535117	C	T	H	H	aromatic, polar, hydrophilic, charged (+)	aromatic, polar, hydrophilic, charged (+)	Conservative	CDS	FTW_0544	hypothetical protein	N\A	complement	534881	536311
DR2-SNP40	sSNP	Schu4-DR2	15172	535621	C	T	T	T	polar, hydrophilic, neutral	polar, hydrophilic, neutral	Conservative	CDS	FTW_0544	hypothetical protein	N\A	complement	534881	536311
DR2-SNP41	nSNP	Schu4-DR2	14669	536124	G	A	S	N	polar, hydrophilic, neutral	polar, hydrophilic, neutral	Conservative	CDS	FTW_0544	hypothetical protein	N\A	complement	534881	536311
DR2-SNP42	sSNP	Schu4-DR2	14641	536152	A	G	S	S	polar, hydrophilic, neutral	polar, hydrophilic, neutral	Conservative	CDS	FTW_0544	hypothetical protein	N\A	complement	534881	536311
DR2-SNP43	nSNP	Schu4-DR2	14602	536191	G	A	M	I	sulfur-containing, hydrophobic, neutral	aliphatic, hydrophobic, neutral	Non-Conservative	CDS	FTW_0544	hypothetical protein	N\A	complement	534881	536311
DR2-SNP44	nSNP	Schu4-DR2	13788	537005	A	G	S	G	polar, hydrophilic, neutral	aliphatic, neutral	Non-Conservative	CDS	FTW_0546	hypothetical protein	N\A	complement	536846	538576
DR2-SNP45	sSNP	Schu4-DR2	13324	537469	C	T	S	S	polar, hydrophilic, neutral	polar, hydrophilic, neutral	Conservative	CDS	FTW_0546	hypothetical protein	N\A	complement	536846	538576
DR2-SNP46	nSNP	Schu4-DR2	12857	537936	A	C	N	T	polar, hydrophilic, neutral	polar, hydrophilic, neutral	Conservative	CDS	FTW_0546	hypothetical protein	N\A	complement	536846	538576
DR2-SNP47	sSNP	Schu4-DR2	11832	538961	A	T	I	I	aliphatic, hydrophobic, neutral	aliphatic, hydrophobic, neutral	Conservative	CDS	FTW_0547	hypothetical protein	N\A	complement	538581	539075
DR2-SNP48	nSNP	Schu4-DR2	11828	538965	T	G	S	A	polar, hydrophilic, neutral	aliphatic, hydrophobic, neutral	Non-Conservative	CDS	FTW_0547	hypothetical protein	N\A	complement	538581	539075
DR2-SNP49	nSNP	Schu4-DR2	11827	538966	C	A	T	N	polar, hydrophilic, neutral	polar, hydrophilic, neutral	Conservative	CDS	FTW_0547	hypothetical protein	N\A	complement	538581	539075
DR2-SNP50	sSNP	Schu4-DR2	10019	540774	G	A	R	R	polar, hydrophilic, charged (+)	polar, hydrophilic, charged (+)	Conservative	CDS	FTW_0549	pathogenicity determinant protein pdpB2	pdpB2	complement	539455	542736
DR2-SNP51	sSNP	Schu4-DR2	10004	540789	A	G	S	S	polar, hydrophilic, neutral	polar, hydrophilic, neutral	Conservative	CDS	FTW_0549	pathogenicity determinant protein pdpB2	pdpB2	complement	539455	542736
DR2-SNP52	nSNP	Schu4-DR2	9292	541501	G	T	V	L	aliphatic, hydrophobic, neutral	aliphatic, hydrophobic, neutral	Conservative	CDS	FTW_0549	pathogenicity determinant protein pdpB2	pdpB2	complement	539455	542736
DR2-SNP53	nSNP	Schu4-DR2	8836	541957	C	A	Q	K	polar, hydrophilic, neutral	polar, hydrophilic, charged (+)	Non-Conservative	CDS	FTW_0549	pathogenicity determinant protein pdpB2	pdpB2	complement	539455	542736
DR2-SNP54	nSNP	Schu4-DR2	8779	542014	C	T	H	Y	aromatic, polar, hydrophilic, charged (+)	aromatic, polar, hydrophobic	Non-Conservative	CDS	FTW_0549	pathogenicity determinant protein pdpB2	pdpB2	complement	539455	542736
DR2-SNP55	nSNP	Schu4-DR2	8748	542045	G	T	W	L	aromatic, hydrophobic, neutral	aliphatic, hydrophobic, neutral	Non-Conservative	CDS	FTW_0549	pathogenicity determinant protein pdpB2	pdpB2	complement	539455	542736
DR2-SNP56	sSNP	Schu4-DR2	8474	542319	A	G	P	P	hydrophobic, neutral	hydrophobic, neutral	Conservative	CDS	FTW_0549	pathogenicity determinant protein pdpB2	pdpB2	complement	539455	542736
DR2-SNP57	sSNP	Schu4-DR2	7096	543697	G	A	L	L	aliphatic, hydrophobic, neutral	aliphatic, hydrophobic, neutral	Conservative	CDS	FTW_0550	pathogenicity determinant protein, pdpA	pdpA2	complement	542741	545203
DR2-SNP58	rSNP	Schu4-DR2	5093	545700	G	A					Ribosomal SNP	Gene	FTW_2070	16S_rRNA	N/A	template
DR2-SNP59	rSNP	Schu4-DR2	2472	548322	T	C					Ribosomal SNP	Gene	FTW_2067	23S_rRNA	N/A	template
DR2-SNP60	rSNP	Schu4-DR2	1222	549572	C	T					Ribosomal SNP	Gene	FTW_2067	23S_rRNA	N/A	template
DR3-SNP1	rSNP	Schu4-DR3	4887	735315	G	A					Ribosomal SNP	Gene	FTW_2071	16S_rRNA	N/A	template
DR3-SNP2	rSNP	Schu4-DR3	4812	735390	G	C					Ribosomal SNP	Gene	FTW_2071	16S_rRNA	N/A	template
DR3-SNP3	rSNP	Schu4-DR3	4811	735391	C	G					Ribosomal SNP	Gene	FTW_2071	16S_rRNA	N/A	template
DR3-SNP4	rSNP	Schu4-DR3	4163	736040	G	C					Ribosomal SNP	Gene	FTW_2071	16S_rRNA	N/A	template
DR3-SNP5	rSNP	Schu4-DR3	4162	736041	C	G					Ribosomal SNP	Gene	FTW_2071	16S_rRNA	N/A	template
DR3-SNP6	rSNP	Schu4-DR3	3525	736677	A	.					Ribosomal INDEL	Gene	FTW_2071	16S_rRNA	N/A	template
DR3-SNP7	rSNP	Schu4-DR3	2265	737937	T	C					Ribosomal SNP	Gene	FTW_2068	23S_rRNA	N/A	template
DR3-SNP8	rSNP	Schu4-DR3	1015	739187	C	T					Ribosomal SNP	Gene	FTW_2068	23S_rRNA	N/A	template
