# Supplementary material for: Complete Genomic Characterization of a Pathogenic A.II Strain of Francisella tularensis Subspecies tularensis
Source: PLoS One. 2007 Sep 26;2(9):e947. doi: 10.1371/journal.pone.0000947 (PMC1978527; doi:10.1371/journal.pone.0000947)
Supplement: Table S6 — Observed and Potential Synonymous and Non-synonymous SNPs between Francisella tularensis subsp. tularensis WY96 and Schu S4 in Comparably Sized Regions. (0.04 MB XLS) [file pone.0000947.s006.xls]

## Sheet: sSNP nSNP Ratios and Age
Table S7. Observed and Potential Synonymous and Non-synonymous SNPs between WY96 and Schu S4 in Comparably Sized Regions
Region	Schu4 Location	WY96 Location	Observed sSNPs	Potential sSNPs	Ks	Observed nSNPs	Potential nSNPs	Ka	Age (years)
Duplicated Region	1,767,715-1,801,625	27,120-61,080	16.5	5371.83	0.00307158	32.5	20287.2	0.001602	1505.68
Comparable Region 1	101,040-136,263	185,675-220,901	11	6226	0.00176678	27	21343.2	0.00126504	866.071
Comparable Region 2	1,332,324-1,371,320	1,375,479-1,414,458	15	7918.34	0.00189434	33	27502.6	0.00119989	928.596
Comparable Region 3	308,810-352,091	1,639,786-1,683,039	26	8149.75	0.00319028	35	28048.2	0.00124785	1563.86
Comparable Region 4	799,170-840,104	570,193-611,125	33	7592.16	0.00434659	34	26775.9	0.0012698	2130.68
