# Supplementary material for: Complete Genomic Characterization of a Pathogenic A.II Strain of Francisella tularensis Subspecies tularensis
Source: PLoS One. 2007 Sep 26;2(9):e947. doi: 10.1371/journal.pone.0000947 (PMC1978527; doi:10.1371/journal.pone.0000947)
Supplement: Table S7 — nSNPs and Stops in Francisella tularensis subsp. tularensis Virulence Genes. (0.02 MB XLS) [file pone.0000947.s007.xls]

## Sheet: Table S8
Table S8. nSNPs and Stops in Francisella tularensis subsp. Tularensis Virulence Genes
SNP Type	MglA-Regulated [15]	Petrosino [12]	Twine [19]	Type IV Pili [17]	Definition
Conservative nSNP	19	42	4	3	Codes for an amino-acid with similar properties
Non-Conservative nSNP	110	157	5	9	Codes for an amino-acid with different properties
Stop	1	3	0	0	Changes from an amino-acid to a stop codon
UnStop	2	2	0	0	Changes from a stop to an amino-acid
Total	132	204	9	12
