# Supplementary material for: Complete Genomic Characterization of a Pathogenic A.II Strain of Francisella tularensis Subspecies tularensis
Source: PLoS One. 2007 Sep 26;2(9):e947. doi: 10.1371/journal.pone.0000947 (PMC1978527; doi:10.1371/journal.pone.0000947)
Supplement: Table S8 — Non-Synonymous SNPs in Virulence Genes of Francisella tularensis subsp. tularensis. (0.17 MB XLS) [file pone.0000947.s008.xls]

## Sheet: Table S9
Table S9. Non-Synonymous SNPs in Virulence Genes of Francisella tularensis subsp. tularensis (WY96 vs Schu S4)
	Schu S4	WY96	Schu S4	WY96	Schu S4	WY96	Schu S4	WY96	Conservation of	Virulence	Schu S4				Schu S4	Schu S4
SNP ID	Position	Position	Nuc	Nuc	AA	AA	Amino-acid Type	Amino-acid Type	of Amino-acid Type	Type	LocusTag	Product	Gene	Strand	GeneStart	GeneEnd	EC Number	Note
SNP10750	71644	156545	A	G	L	P	aliphatic, hydrophobic, neutral	hydrophobic, neutral	Non-Conservative	MglA-regulated [15]	FTT0070c	major facilitator superfamily (MFS) tranport protein	ampG	complement	70944	72209		Similar to AMPG_ECOLI (P36670) AmpG protein from E. coli (491 aa). FASTA: opt: 996 Z-score: 1121.1 E(): 1.5e-54 Smith-Waterman score: 996; 38.614 identity in 404 aa overlap
SNP180323	104755	189389	C	T	S	L	polar, hydrophilic, neutral	aliphatic, hydrophobic, neutral	Non-Conservative	MglA-regulated [15]	FTT0101	conserved membrane hypothetical protein	N\A	template	104514	105527		Similar to Y402_RICPR (Q9ZDC9) Hypothetical protein RP402 from Rickettsia prowazekii (317 aa). FASTA: opt: 431 Z-score: 518.0 E(): 5.9e-21 Smith-Waterman score: 432; 28.909 identity in 339 aa overlap ORF ftt0101
SNP309934	105133	189767	T	C	I	T	aliphatic, hydrophobic, neutral	polar, hydrophilic, neutral	Non-Conservative	MglA-regulated [15]	FTT0101	conserved membrane hypothetical protein	N\A	template	104514	105527		Similar to Y402_RICPR (Q9ZDC9) Hypothetical protein RP402 from Rickettsia prowazekii (317 aa). FASTA: opt: 431 Z-score: 518.0 E(): 5.9e-21 Smith-Waterman score: 432; 28.909 identity in 339 aa overlap ORF ftt0101
SNP1679	133395	218033	A	C	Y	S	aromatic, hydrophobic, polar	polar, hydrophilic, neutral	Non-Conservative	MglA-regulated [15]	FTT0122		oppA	template	133349	134806		Similar to OPPA_HAEIN (P71370) Periplasmic oligopeptide-binding protein (precursor) from Haemophilus influenzae (541 aa). FASTA: opt: 924 Z-score: 1112.1 E(): 4.7e-54 Smith-Waterman score: 924; 34.490identity in 461 aa overlap oligopeptide transporter, subunit A, ABC transporter, periplasmic protein
SNP213510	133431	218069	T	C	I	T	aliphatic, hydrophobic, neutral	polar, hydrophilic, neutral	Non-Conservative	MglA-regulated [15]	FTT0122		oppA	template	133349	134806		Similar to OPPA_HAEIN (P71370) Periplasmic oligopeptide-binding protein (precursor) from Haemophilus influenzae (541 aa). FASTA: opt: 924 Z-score: 1112.1 E(): 4.7e-54 Smith-Waterman score: 924; 34.490identity in 461 aa overlap oligopeptide transporter, subunit A, ABC transporter, periplasmic protein
SNP152872	133697	218335	A	G	T	A	polar, hydrophilic, neutral	aliphatic, hydrophobic, neutral	Non-Conservative	MglA-regulated [15]	FTT0122		oppA	template	133349	134806		Similar to OPPA_HAEIN (P71370) Periplasmic oligopeptide-binding protein (precursor) from Haemophilus influenzae (541 aa). FASTA: opt: 924 Z-score: 1112.1 E(): 4.7e-54 Smith-Waterman score: 924; 34.490identity in 461 aa overlap oligopeptide transporter, subunit A, ABC transporter, periplasmic protein
SNP188764	134511	219149	A	C	Q	P	polar, hydrophilic, neutral	hydrophobic, neutral	Non-Conservative	MglA-regulated [15]	FTT0122		oppA	template	133349	134806		Similar to OPPA_HAEIN (P71370) Periplasmic oligopeptide-binding protein (precursor) from Haemophilus influenzae (541 aa). FASTA: opt: 924 Z-score: 1112.1 E(): 4.7e-54 Smith-Waterman score: 924; 34.490identity in 461 aa overlap oligopeptide transporter, subunit A, ABC transporter, periplasmic protein
SNP85977	134698	219336	T	G	H	Q	aromatic, polar, hydrophilic, charged(+)	polar, hydrophilic, neutral	Non-Conservative	MglA-regulated [15]	FTT0122		oppA	template	133349	134806		Similar to OPPA_HAEIN (P71370) Periplasmic oligopeptide-binding protein (precursor) from Haemophilus influenzae (541 aa). FASTA: opt: 924 Z-score: 1112.1 E(): 4.7e-54 Smith-Waterman score: 924; 34.490identity in 461 aa overlap oligopeptide transporter, subunit A, ABC transporter, periplasmic protein
SNP234726	135736	220374	G	A	G	R	aliphatic, neutral	polar, hydrophilic, charged(+)	Non-Conservative	MglA-regulated [15]	FTT0123	oligopeptide transporter, subunit B, ABC transporter, membrane protein, pseudogene	oppB	template	135100	135765		Similar to Q9CJT2 (Q9CJT2) OppB from Pasteurella multicoda (306 aa) FASTA: opt: 953 Z-score: 1065.0 E(): 2e-51 Smith-Waterman score: 953; 46.645 identity in 313 aa overlap. Contains a frameshift after aa 89
SNP136495	136681	221131	G	A	A	T	aliphatic, hydrophobic, neutral	polar, hydrophilic, neutral	Non-Conservative	MglA-regulated [15]	FTT0125	oligopeptide transporter, subunit D, ABC transporter, ATP-binding protein	oppD	template	136633	137601		Similar to Q8D8A2 Oligopeptide ABC transporter,ATP-binding protein D from Vibrio vulnificus (324 aa). FASTA: opt: 1202 Z-score: 1353.8 E(): 1.6e-67 Smith-Waterman score: 1202; 56.270 identity in 311 aa overlap
SNP246209	212099	1779269	T	A	I	F	aliphatic, hydrophobic, neutral	aromatic, hydrophobic, neutral	Non-Conservative	MglA-regulated [15]	FTT0194c	conserved hypothetical membrane protein	N\A	complement	211569	212441		Similar to Q8X898 Hypothetical 31.1 kDa protein (Hypothetical membrane protein) from E.coli (274 aa). FASTA: opt: 398 Z-score: 431.1 E(): 4e-16 Smith-Waterman score: 398; 26.429 identity in 280 aa overlap ORF ftt0194c
SNP166652	254455	1735814	C	G	A	G	aliphatic, hydrophobic, neutral	aliphatic, neutral	Non-Conservative	MglA-regulated [15]	FTT0242	hypothetical protein	N\A	template	254157	254720		Similar to Q83DS9 Hypothetical protein CBU0616 from Coxiella burnetii (196 aa). FASTA: opt: 376 Z-score: 484.1 E(): 4.5e-19 Smith-Waterman score: 376; 37.634 identity in 186 aa overlap ORF ftt0242
SNP211038	267848	1754714	G	A	A	T	aliphatic, hydrophobic, neutral	polar, hydrophilic, neutral	Non-Conservative	MglA-regulated [15]	FTT0251	Branched-chain amino acid aminotransferase protein (class IV)	ilvE	template	267098	267985	2.6.1.42	Similar to Q8Y1X0 Probable branched-chain amino acid aminotransferase protein from Ralstonia solanacearum (309 aa). FASTA: opt: 706 Z-score: 903.1 E(): 2.1e-42 Smith-Waterman score: 706; 39.931 identity in 288 aa overlap
SNP21607	268435	1755301	A	G	E	G	polar, hydrophilic, charged(-)	aliphatic, neutral	Non-Conservative	MglA-regulated [15]	FTT0252	2-isopropylmalate synthase	leuA	template	267996	269369	2.3.3.13	Similar to Q9C5X5 2-isopropylmalate synthase from Arabidopsis thaliana (503 aa). FASTA: opt: 493 Z-score: 601.2 E(): 1.4e-25 Smith-Waterman score: 635; 31.373 identity in 408 aa overlap. This CDS is disrupted by the insertion of an ISFtu1 element occurring very near the C-terminal end. It is not clear whether this insertion affects the function of the protein
SNP354773	268467	1755333	G	A	D	N	polar, hydrophilic, charged(-)	polar, hydrophilic, neutral	Non-Conservative	MglA-regulated [15]	FTT0252	2-isopropylmalate synthase	leuA	template	267996	269369	2.3.3.13	Similar to Q9C5X5 2-isopropylmalate synthase from Arabidopsis thaliana (503 aa). FASTA: opt: 493 Z-score: 601.2 E(): 1.4e-25 Smith-Waterman score: 635; 31.373 identity in 408 aa overlap. This CDS is disrupted by the insertion of an ISFtu1 element occurring very near the C-terminal end. It is not clear whether this insertion affects the function of the protein
SNP204539	268584	1755450	A	G	I	V	aliphatic, hydrophobic, neutral	aliphatic, hydrophobic, neutral	Conservative	MglA-regulated [15]	FTT0252	2-isopropylmalate synthase	leuA	template	267996	269369	2.3.3.13	Similar to Q9C5X5 2-isopropylmalate synthase from Arabidopsis thaliana (503 aa). FASTA: opt: 493 Z-score: 601.2 E(): 1.4e-25 Smith-Waterman score: 635; 31.373 identity in 408 aa overlap. This CDS is disrupted by the insertion of an ISFtu1 element occurring very near the C-terminal end. It is not clear whether this insertion affects the function of the protein
SNP22047	268892	1755758	A	G	I	M	aliphatic, hydrophobic, neutral	hydrophobic, neutral	Non-Conservative	MglA-regulated [15]	FTT0252	2-isopropylmalate synthase	leuA	template	267996	269369	2.3.3.13	Similar to Q9C5X5 2-isopropylmalate synthase from Arabidopsis thaliana (503 aa). FASTA: opt: 493 Z-score: 601.2 E(): 1.4e-25 Smith-Waterman score: 635; 31.373 identity in 408 aa overlap. This CDS is disrupted by the insertion of an ISFtu1 element occurring very near the C-terminal end. It is not clear whether this insertion affects the function of the protein
SNP184274	270556	1704415	G	A	T	I	polar, hydrophilic, neutral	aliphatic, hydrophobic, neutral	Non-Conservative	MglA-regulated [15]	FTT0254c	hypothetical protein	N\A	complement	270393	270764		ORF ftt0254c
SNP274608	270674	1704533	A	G	F	L	aromatic, hydrophobic, neutral	aliphatic, hydrophobic, neutral	Non-Conservative	MglA-regulated [15]	FTT0254c	hypothetical protein	N\A	complement	270393	270764		ORF ftt0254c
SNP271138	311183	1680669	G	A	V	I	aliphatic, hydrophobic, neutral	aliphatic, hydrophobic, neutral	Conservative	MglA-regulated [15]	FTT0296	Pyrrolidone-carboxylate peptidase	pcp	template	310619	311296	3.4.19.3	Similar to PCP_CLOPE (Q8XKH1) Pyrrolidone-carboxylate peptidase from Clostridium perfringens (215 aa). FASTA: opt: 710 Z-score: 844.3 E(): 3.9e-39 Smith-Waterman score: 710; 52.020identity in 198 aa overlap
SNP168423	325410	1666443	T	C	I	T	aliphatic, hydrophobic, neutral	polar, hydrophilic, neutral	Non-Conservative	MglA-regulated [15]	FTT0310	amino acid permease	N\A	template	324974	326428		Similar to Q8XT33 Probable amino-acid permease transmembrane protein from Ralstonia solanacearum (543 aa). FASTA: opt: 999 Z-score: 1146.0 E(): 5.5e-5 Smith-Waterman score: 999; 34.924 identity in 461 aa overlap ORF ftt0310
SNP299851	325923	1665930	T	C	L	S	aliphatic, hydrophobic, neutral	polar, hydrophilic, neutral	Non-Conservative	MglA-regulated [15]	FTT0310	amino acid permease	N\A	template	324974	326428		Similar to Q8XT33 Probable amino-acid permease transmembrane protein from Ralstonia solanacearum (543 aa). FASTA: opt: 999 Z-score: 1146.0 E(): 5.5e-5 Smith-Waterman score: 999; 34.924 identity in 461 aa overlap ORF ftt0310
SNP105135	327104	1664773	G	A	Q	*	polar, hydrophilic, neutral		Stop	MglA-regulated [15]	FTT0311c	hypothetical protein	N\A	complement	326760	327683		Similar to Q9KKV6 Hypothetical protein VCA0994 from Vibrio cholerae (326 aa). FASTA: opt: 558 Z-score: 686.8 E(): 2.3e-30 Smith-Waterman score: 558; 31.949 identity in 313 aa overlap ORF ftt0311c
SNP32796	435845	1556741	G	T	V	L	aliphatic, hydrophobic, neutral	aliphatic, hydrophobic, neutral	Conservative	MglA-regulated [15]	FTT0421	outer membrane lipoprotein, pseudogene	N\A	template	435656	435886		Similar to Q8ZRH1 Putative outer membrane lipoprotein from Salmonella typhimurium (119 aa). FASTA: opt: 327 Z-score: 429.7 bits: 84.9 E(): 4.4e-16 Smith-Waterman score: 327; 43.860 identity in 114 aa overlap ORF ftt0421
SNP231746	436010	1556575	A	C	Y	S	aromatic, hydrophobic, polar	polar, hydrophilic, neutral	Non-Conservative	MglA-regulated [15]	FTT0421	outer membrane lipoprotein, pseudogene	N\A	template	435886	436011		Similar to Q8ZRH1 Putative outer membrane lipoprotein from Salmonella typhimurium (119 aa). FASTA: opt: 327 Z-score: 429.7 bits: 84.9 E(): 4.4e-16 Smith-Waterman score: 327; 43.860 identity in 114 aa overlap ORF ftt0421
SNP227603	570128	944052	T	C	F	S	aromatic, hydrophobic, neutral	polar, hydrophilic, neutral	Non-Conservative	MglA-regulated [15]	FTT0551	conserved hypothetical protein, pseudogene	N\A	template	570082	570834		Similar to Q92LL0 Hypothetical protein R03032 from Rhizobium meliloti (367 aa). FASTA: opt: 921 Z-score: 1129.8 E(): 4.9e-55 Smith-Waterman score: 921; 44.186 identity in 344 aa overlap. Contains a frameshift after aa 102. Frameshift occurs at a heptanucleotide sequence and so could be part of a programmed translational frameshift. ORF ftt0551
SNP261409	570341	943839	A	G	D	G	polar, hydrophilic, charged(-)	aliphatic, neutral	Non-Conservative	MglA-regulated [15]	FTT0551	conserved hypothetical protein, pseudogene	N\A	template	570082	570834		Similar to Q92LL0 Hypothetical protein R03032 from Rhizobium meliloti (367 aa). FASTA: opt: 921 Z-score: 1129.8 E(): 4.9e-55 Smith-Waterman score: 921; 44.186 identity in 344 aa overlap. Contains a frameshift after aa 102. Frameshift occurs at a heptanucleotide sequence and so could be part of a programmed translational frameshift. ORF ftt0551
SNP165289	571070	943109	A	G	D	G	polar, hydrophilic, charged(-)	aliphatic, neutral	Non-Conservative	MglA-regulated [15]	FTT0552	aldehyde dehydrogenase	N\A	template	570847	572343	1.2.1.-	Similar to Q8P9Q7 Aldehyde dehydrogenase from Xanthomonas campestris (510 aa). FASTA: opt: 1972 Z-score: 2329.9 E(): 6.9e-122 Smith-Waterman score: 1972; 60.285 identity in 491 aa overlap ORF ftt0552
SNP242803	571329	942850	T	A	N	K	polar, hydrophilic, neutral	polar, hydrophilic, charged(+)	Non-Conservative	MglA-regulated [15]	FTT0552	aldehyde dehydrogenase	N\A	template	570847	572343	1.2.1.-	Similar to Q8P9Q7 Aldehyde dehydrogenase from Xanthomonas campestris (510 aa). FASTA: opt: 1972 Z-score: 2329.9 E(): 6.9e-122 Smith-Waterman score: 1972; 60.285 identity in 491 aa overlap ORF ftt0552
SNP99319	571385	942794	T	C	I	T	aliphatic, hydrophobic, neutral	polar, hydrophilic, neutral	Non-Conservative	MglA-regulated [15]	FTT0552	aldehyde dehydrogenase	N\A	template	570847	572343	1.2.1.-	Similar to Q8P9Q7 Aldehyde dehydrogenase from Xanthomonas campestris (510 aa). FASTA: opt: 1972 Z-score: 2329.9 E(): 6.9e-122 Smith-Waterman score: 1972; 60.285 identity in 491 aa overlap ORF ftt0552
SNP228891	572177	942002	C	A	S	Y	polar, hydrophilic, neutral	aromatic, hydrophobic, polar	Non-Conservative	MglA-regulated [15]	FTT0552	aldehyde dehydrogenase	N\A	template	570847	572343	1.2.1.-	Similar to Q8P9Q7 Aldehyde dehydrogenase from Xanthomonas campestris (510 aa). FASTA: opt: 1972 Z-score: 2329.9 E(): 6.9e-122 Smith-Waterman score: 1972; 60.285 identity in 491 aa overlap ORF ftt0552
SNP271466	630466	1059668	T	C	S	G	polar, hydrophilic, neutral	aliphatic, neutral	Non-Conservative	MglA-regulated [15]	FTT0611c	beta-lactamase	N\A	complement	630248	631111	3.5.2.6	Similar to Q9L6I3 Extended-spectrum beta-lactamase BES-1 from Serratia marcescens (292 aa).FASTA: opt: 621 Z-score: 723.1 E(): 2.2e-32 Smith-Waterman score: 621; 34.397 identity in 282 aa overlap ORF ftt0611c
SNP154182	632960	1057172	A	G	L	S	aliphatic, hydrophobic, neutral	polar, hydrophilic, neutral	Non-Conservative	MglA-regulated [15]	FTT0613c	hypothetical protein	N\A	complement	632680	633099		This ORF is longer. ORF ftt0613c
SNP112263	671098	1019058	T	C	V	A	aliphatic, hydrophobic, neutral	aliphatic, hydrophobic, neutral	Conservative	MglA-regulated [15]	FTT0651	Proton-dependent oligopeptide transport (POT) family protein	N\A	template	670962	672530		Similar to Q9L9P6 IraB from Legionella pneumophila (501 aa). FASTA: opt: 1486 Z-score: 1640.1 E(): 1.8e-83 Smith-Waterman score: 1486; 46.708 identity in 486 aa overlap. ORF ftt0651
SNP133682	671421	1018735	G	A	G	R	aliphatic, neutral	polar, hydrophilic, charged(+)	Non-Conservative	MglA-regulated [15]	FTT0651	Proton-dependent oligopeptide transport (POT) family protein	N\A	template	670962	672530		Similar to Q9L9P6 IraB from Legionella pneumophila (501 aa). FASTA: opt: 1486 Z-score: 1640.1 E(): 1.8e-83 Smith-Waterman score: 1486; 46.708 identity in 486 aa overlap. ORF ftt0651
SNP186413	671866	1018290	A	G	H	R	aromatic, polar, hydrophilic, charged(+)	polar, hydrophilic, charged(+)	Non-Conservative	MglA-regulated [15]	FTT0651	Proton-dependent oligopeptide transport (POT) family protein	N\A	template	670962	672530		Similar to Q9L9P6 IraB from Legionella pneumophila (501 aa). FASTA: opt: 1486 Z-score: 1640.1 E(): 1.8e-83 Smith-Waterman score: 1486; 46.708 identity in 486 aa overlap. ORF ftt0651
SNP228126	672307	1017849	A	G	E	G	polar, hydrophilic, charged(-)	aliphatic, neutral	Non-Conservative	MglA-regulated [15]	FTT0651	Proton-dependent oligopeptide transport (POT) family protein	N\A	template	670962	672530		Similar to Q9L9P6 IraB from Legionella pneumophila (501 aa). FASTA: opt: 1486 Z-score: 1640.1 E(): 1.8e-83 Smith-Waterman score: 1486; 46.708 identity in 486 aa overlap. ORF ftt0651
SNP262842	745677	1421938	A	G	S	P	polar, hydrophilic, neutral	hydrophobic, neutral	Non-Conservative	MglA-regulated [15]	FTT0723c	Short-chain dehydrogenase/reductase family protein	N\A	complement	745381	746169	1.-.-.-	Similar to Q88H18 Oxidoreductase, short chain dehydrogenase/reductase family Pseudomonas putida (strain KT2440) (248 aa). FASTA: opt: 792 Z-score: 881.9 E(): 3.1e-41 Smith-Waterman score: 792; 47.984 identity in 248 aa overlap. ORF ftt0723c
SNP229387	746729	1420886	C	T	A	T	aliphatic, hydrophobic, neutral	polar, hydrophilic, neutral	Non-Conservative	MglA-regulated [15]	FTT0724c	D-alanyl-D-alanine carboxypeptidase (Penicillin binding protein) family protein, pseudogene	dacB1	complement	746163	747149	3.4.16.4	Similar to Q8EEI8 Penicillin-binding protein 4 from Shewanella oneidensis (507 aa) aa). FASTA: opt: 645 Z-score: 721.3 E(): 2.5e-32 Smith-Waterman score: 645; 31.478identity in 467 aa overlap. Contains a frameshift after aa 136. Frameshift occurs at a heptanucleotide sequence and so could be part of a programmed translational frameshift
SNP230465	746731	1420884	G	T	T	K	polar, hydrophilic, neutral	polar, hydrophilic, charged(+)	Non-Conservative	MglA-regulated [15]	FTT0724c	D-alanyl-D-alanine carboxypeptidase (Penicillin binding protein) family protein, pseudogene	dacB1	complement	746163	747149	3.4.16.4	Similar to Q8EEI8 Penicillin-binding protein 4 from Shewanella oneidensis (507 aa) aa). FASTA: opt: 645 Z-score: 721.3 E(): 2.5e-32 Smith-Waterman score: 645; 31.478identity in 467 aa overlap. Contains a frameshift after aa 136. Frameshift occurs at a heptanucleotide sequence and so could be part of a programmed translational frameshift
SNP21051	746849	1420766	C	A	G	C	aliphatic, neutral	polar, hydrophobic, neutral	Non-Conservative	MglA-regulated [15]	FTT0724c	D-alanyl-D-alanine carboxypeptidase (Penicillin binding protein) family protein, pseudogene	dacB1	complement	746163	747149	3.4.16.4	Similar to Q8EEI8 Penicillin-binding protein 4 from Shewanella oneidensis (507 aa) aa). FASTA: opt: 645 Z-score: 721.3 E(): 2.5e-32 Smith-Waterman score: 645; 31.478identity in 467 aa overlap. Contains a frameshift after aa 136. Frameshift occurs at a heptanucleotide sequence and so could be part of a programmed translational frameshift
SNP208084	747141	1420474	A	C	N	K	polar, hydrophilic, neutral	polar, hydrophilic, charged(+)	Non-Conservative	MglA-regulated [15]	FTT0724c	D-alanyl-D-alanine carboxypeptidase (Penicillin binding protein) family protein, pseudogene	dacB1	complement	746163	747149	3.4.16.4	Similar to Q8EEI8 Penicillin-binding protein 4 from Shewanella oneidensis (507 aa) aa). FASTA: opt: 645 Z-score: 721.3 E(): 2.5e-32 Smith-Waterman score: 645; 31.478identity in 467 aa overlap. Contains a frameshift after aa 136. Frameshift occurs at a heptanucleotide sequence and so could be part of a programmed translational frameshift
SNP232187	769255	641889	T	C	T	A	polar, hydrophilic, neutral	aliphatic, hydrophobic, neutral	Non-Conservative	MglA-regulated [15]	FTT0747c	hypothetical protein	N\A	complement	769163	769948		Similar to Q88NQ3 Membrane fusion protein,putative (289 aa). FASTA: opt: 721 Z-score: 853.4 E(): 1.2e-39 Smith-Waterman score: 721; 41.434identity in 251 aa overlap. Similar to ydhJ and yhcQ in E. coli. ORF ftt0747c
SNP148262	858355	1262888	T	G	*	E		polar, hydrophilic, charged(-)	UnStop	MglA-regulated [15]	FTT0844	rossman fold oxidoreductase, pseudogene	N\A	template	858355	858900	1.-.-.-	Similar to Q9F7P6 Predicted CsgA,Rossman fold oxidoreductase from Gamma-proteobacterium EBAC31A08 (262 aa). FASTA: opt: 764 Z-score: 936.3 E(): 2.9e-44 Smith-Waterman score: 764; 53.390identity in 236 aa overlap. Contains an in-frame stop codon after aa 59 ORF ftt0844
SNP194507	865449	1255911	C	A	H	N	aromatic, polar, hydrophilic, charged(+)	polar, hydrophilic, neutral	Non-Conservative	MglA-regulated [15]	FTT0852	conserved hypothetical protein, pseudogene	N\A	template	865344	865892		Weakly similar to Q8D5E8 Transglutaminase-like enzyme from Vibrio vulnificus (300 aa). FASTA: opt: 336 Z-score: 432.9 E(): 3.2e-16 Smith-Waterman score: 401; 29.779 identity in 272 aa overlap. Contains a frameshift after codon 183 ORF ftt0852
SNP200683	865539	1255821	T	C	F	L	aromatic, hydrophobic, neutral	aliphatic, hydrophobic, neutral	Non-Conservative	MglA-regulated [15]	FTT0852	conserved hypothetical protein, pseudogene	N\A	template	865344	865892		Weakly similar to Q8D5E8 Transglutaminase-like enzyme from Vibrio vulnificus (300 aa). FASTA: opt: 336 Z-score: 432.9 E(): 3.2e-16 Smith-Waterman score: 401; 29.779 identity in 272 aa overlap. Contains a frameshift after codon 183 ORF ftt0852
SNP137577	865677	1255683	A	G	S	G	polar, hydrophilic, neutral	aliphatic, neutral	Non-Conservative	MglA-regulated [15]	FTT0852	conserved hypothetical protein, pseudogene	N\A	template	865344	865892		Weakly similar to Q8D5E8 Transglutaminase-like enzyme from Vibrio vulnificus (300 aa). FASTA: opt: 336 Z-score: 432.9 E(): 3.2e-16 Smith-Waterman score: 401; 29.779 identity in 272 aa overlap. Contains a frameshift after codon 183 ORF ftt0852
SNP154155	865680	1255680	A	G	T	A	polar, hydrophilic, neutral	aliphatic, hydrophobic, neutral	Non-Conservative	MglA-regulated [15]	FTT0852	conserved hypothetical protein, pseudogene	N\A	template	865344	865892		Weakly similar to Q8D5E8 Transglutaminase-like enzyme from Vibrio vulnificus (300 aa). FASTA: opt: 336 Z-score: 432.9 E(): 3.2e-16 Smith-Waterman score: 401; 29.779 identity in 272 aa overlap. Contains a frameshift after codon 183 ORF ftt0852
SNP190682	865732	1255628	G	A	R	H	polar, hydrophilic, charged(+)	aromatic, polar, hydrophilic, charged(+)	Non-Conservative	MglA-regulated [15]	FTT0852	conserved hypothetical protein, pseudogene	N\A	template	865344	865892		Weakly similar to Q8D5E8 Transglutaminase-like enzyme from Vibrio vulnificus (300 aa). FASTA: opt: 336 Z-score: 432.9 E(): 3.2e-16 Smith-Waterman score: 401; 29.779 identity in 272 aa overlap. Contains a frameshift after codon 183 ORF ftt0852
SNP174066	866319	1255041	G	A	G	E	aliphatic, neutral	polar, hydrophilic, charged(-)	Non-Conservative	MglA-regulated [15]	FTT0852	conserved hypothetical protein, pseudogene	N\A	template	865892	866326		Weakly similar to Q8D5E8 Transglutaminase-like enzyme from Vibrio vulnificus (300 aa). FASTA: opt: 336 Z-score: 432.9 E(): 3.2e-16 Smith-Waterman score: 401; 29.779 identity in 272 aa overlap. Contains a frameshift after codon 183 ORF ftt0852
SNP335154	890824	1230584	T	C	S	P	polar, hydrophilic, neutral	hydrophobic, neutral	Non-Conservative	MglA-regulated [15]	FTT0883	alcohol dehydrogenase class III, pseudogene	N\A	template	890650	890886	1.2.1.1	Similar to CAD84818 Alcohol dehydrogenase class III from Ralstonia solanacearum (368 aa). FASTA: opt: 1760 Z-score: 1914.4 E(): 8.8e-99 Smith-Waterman score: 1760; 69.189identity in 370 aa overlap. Contains frameshifts after aa 86 and 105 ORF ftt0883
SNP43817	890994	1230415	T	G	C	G	polar, hydrophobic, neutral	aliphatic, neutral	Non-Conservative	MglA-regulated [15]	FTT0883	alcohol dehydrogenase class III, pseudogene	N\A	template	890964	891758	1.2.1.1	Similar to CAD84818 Alcohol dehydrogenase class III from Ralstonia solanacearum (368 aa). FASTA: opt: 1760 Z-score: 1914.4 E(): 8.8e-99 Smith-Waterman score: 1760; 69.189identity in 370 aa overlap. Contains frameshifts after aa 86 and 105 ORF ftt0883
SNP299010	891413	1229996	T	G	F	L	aromatic, hydrophobic, neutral	aliphatic, hydrophobic, neutral	Non-Conservative	MglA-regulated [15]	FTT0883	alcohol dehydrogenase class III, pseudogene	N\A	template	890964	891758	1.2.1.1	Similar to CAD84818 Alcohol dehydrogenase class III from Ralstonia solanacearum (368 aa). FASTA: opt: 1760 Z-score: 1914.4 E(): 8.8e-99 Smith-Waterman score: 1760; 69.189identity in 370 aa overlap. Contains frameshifts after aa 86 and 105 ORF ftt0883
SNP42957	891725	1229684	G	T	E	D	polar, hydrophilic, charged(-)	polar, hydrophilic, charged(-)	Conservative	MglA-regulated [15]	FTT0883	alcohol dehydrogenase class III, pseudogene	N\A	template	890964	891758	1.2.1.1	Similar to CAD84818 Alcohol dehydrogenase class III from Ralstonia solanacearum (368 aa). FASTA: opt: 1760 Z-score: 1914.4 E(): 8.8e-99 Smith-Waterman score: 1760; 69.189identity in 370 aa overlap. Contains frameshifts after aa 86 and 105 ORF ftt0883
SNP72275	891754	1229655	T	C	I	T	aliphatic, hydrophobic, neutral	polar, hydrophilic, neutral	Non-Conservative	MglA-regulated [15]	FTT0883	alcohol dehydrogenase class III, pseudogene	N\A	template	890964	891758	1.2.1.1	Similar to CAD84818 Alcohol dehydrogenase class III from Ralstonia solanacearum (368 aa). FASTA: opt: 1760 Z-score: 1914.4 E(): 8.8e-99 Smith-Waterman score: 1760; 69.189identity in 370 aa overlap. Contains frameshifts after aa 86 and 105 ORF ftt0883
SNP350751	912327	1209081	T	C	I	T	aliphatic, hydrophobic, neutral	polar, hydrophilic, neutral	Non-Conservative	MglA-regulated [15]	FTT0905	Type IV pili glycosylation protein	N\A	template	912218	913660		Similar to Q8KQ19 PilO from Pseudomonas aeruginosa (461 aa). FASTA: opt: 283 Z-score: 329.7 E(): 1.6e-10 Smith-Waterman score: 283; 25.284 identity in 352 aa overlap. PilO is required for glycosylation of Pseudomonas aeruginosa pilin. ORF ftt0905
SNP159340	912341	1209067	A	G	I	V	aliphatic, hydrophobic, neutral	aliphatic, hydrophobic, neutral	Conservative	MglA-regulated [15]	FTT0905	Type IV pili glycosylation protein	N\A	template	912218	913660		Similar to Q8KQ19 PilO from Pseudomonas aeruginosa (461 aa). FASTA: opt: 283 Z-score: 329.7 E(): 1.6e-10 Smith-Waterman score: 283; 25.284 identity in 352 aa overlap. PilO is required for glycosylation of Pseudomonas aeruginosa pilin. ORF ftt0905
SNP269430	912353	1209055	T	G	S	A	polar, hydrophilic, neutral	aliphatic, hydrophobic, neutral	Non-Conservative	MglA-regulated [15]	FTT0905	Type IV pili glycosylation protein	N\A	template	912218	913660		Similar to Q8KQ19 PilO from Pseudomonas aeruginosa (461 aa). FASTA: opt: 283 Z-score: 329.7 E(): 1.6e-10 Smith-Waterman score: 283; 25.284 identity in 352 aa overlap. PilO is required for glycosylation of Pseudomonas aeruginosa pilin. ORF ftt0905
SNP176763	912393	1209015	C	A	A	D	aliphatic, hydrophobic, neutral	polar, hydrophilic, charged(-)	Non-Conservative	MglA-regulated [15]	FTT0905	Type IV pili glycosylation protein	N\A	template	912218	913660		Similar to Q8KQ19 PilO from Pseudomonas aeruginosa (461 aa). FASTA: opt: 283 Z-score: 329.7 E(): 1.6e-10 Smith-Waterman score: 283; 25.284 identity in 352 aa overlap. PilO is required for glycosylation of Pseudomonas aeruginosa pilin. ORF ftt0905
SNP46976	912725	1208683	G	T	G	W	aliphatic, neutral	aromatic, hydrophobic, neutral	Non-Conservative	MglA-regulated [15]	FTT0905	Type IV pili glycosylation protein	N\A	template	912218	913660		Similar to Q8KQ19 PilO from Pseudomonas aeruginosa (461 aa). FASTA: opt: 283 Z-score: 329.7 E(): 1.6e-10 Smith-Waterman score: 283; 25.284 identity in 352 aa overlap. PilO is required for glycosylation of Pseudomonas aeruginosa pilin. ORF ftt0905
SNP250135	913406	1208002	T	C	S	P	polar, hydrophilic, neutral	hydrophobic, neutral	Non-Conservative	MglA-regulated [15]	FTT0905	Type IV pili glycosylation protein	N\A	template	912218	913660		Similar to Q8KQ19 PilO from Pseudomonas aeruginosa (461 aa). FASTA: opt: 283 Z-score: 329.7 E(): 1.6e-10 Smith-Waterman score: 283; 25.284 identity in 352 aa overlap. PilO is required for glycosylation of Pseudomonas aeruginosa pilin. ORF ftt0905
SNP287422	972035	832874	G	T	G	V	aliphatic, neutral	aliphatic, hydrophobic, neutral	Non-Conservative	MglA-regulated [15]	FTT0960	hypothetical protein	N\A	template	971902	972885		Simiar to Q8EAC2 Conserved hypothetical protein Shewanella oneidensis (371 aa). FASTA: opt: 607 Z-score: 717.9 E(): 3.9e-32 Smith-Waterman score: 607; 32.622 identity in 328 aa overlap ORF ftt0960
SNP196776	972412	833251	A	T	S	C	polar, hydrophilic, neutral	polar, hydrophobic, neutral	Non-Conservative	MglA-regulated [15]	FTT0960	hypothetical protein	N\A	template	971902	972885		Simiar to Q8EAC2 Conserved hypothetical protein Shewanella oneidensis (371 aa). FASTA: opt: 607 Z-score: 717.9 E(): 3.9e-32 Smith-Waterman score: 607; 32.622 identity in 328 aa overlap ORF ftt0960
SNP223318	972523	833362	T	G	C	G	polar, hydrophobic, neutral	aliphatic, neutral	Non-Conservative	MglA-regulated [15]	FTT0960	hypothetical protein	N\A	template	971902	972885		Simiar to Q8EAC2 Conserved hypothetical protein Shewanella oneidensis (371 aa). FASTA: opt: 607 Z-score: 717.9 E(): 3.9e-32 Smith-Waterman score: 607; 32.622 identity in 328 aa overlap ORF ftt0960
SNP220153	986478	847318	G	A	A	T	aliphatic, hydrophobic, neutral	polar, hydrophilic, neutral	Non-Conservative	MglA-regulated [15]	FTT0974	amidinotransferase family protein, pseudogene	N\A	template	986280	986498	2.1.4.-	Similar to Q826R2 Hypothetical protein from Streptomyces avermitilis (289 aa). FASTA: opt: 558 Z-score: 707.3 bits: 138.7 E(): 1.7e-31 Smith-Waterman score: 558; 34.351identity in 262 aa overlap. Contains an in-frame stop codon after aa 71 ORF ftt0974
SNP59889	986836	847676	C	A	P	Q	hydrophobic, neutral	polar, hydrophilic, neutral	Non-Conservative	MglA-regulated [15]	FTT0974	amidinotransferase family protein, pseudogene	N\A	template	986499	987062	2.1.4.-	Similar to Q826R2 Hypothetical protein from Streptomyces avermitilis (289 aa). FASTA: opt: 558 Z-score: 707.3 bits: 138.7 E(): 1.7e-31 Smith-Waterman score: 558; 34.351identity in 262 aa overlap. Contains an in-frame stop codon after aa 71 ORF ftt0974
SNP260376	986875	847715	C	A	T	N	polar, hydrophilic, neutral	polar, hydrophilic, neutral	Conservative	MglA-regulated [15]	FTT0974	amidinotransferase family protein, pseudogene	N\A	template	986499	987062	2.1.4.-	Similar to Q826R2 Hypothetical protein from Streptomyces avermitilis (289 aa). FASTA: opt: 558 Z-score: 707.3 bits: 138.7 E(): 1.7e-31 Smith-Waterman score: 558; 34.351identity in 262 aa overlap. Contains an in-frame stop codon after aa 71 ORF ftt0974
SNP201943	986946	847786	A	G	N	D	polar, hydrophilic, neutral	polar, hydrophilic, charged(-)	Non-Conservative	MglA-regulated [15]	FTT0974	amidinotransferase family protein, pseudogene	N\A	template	986499	987062	2.1.4.-	Similar to Q826R2 Hypothetical protein from Streptomyces avermitilis (289 aa). FASTA: opt: 558 Z-score: 707.3 bits: 138.7 E(): 1.7e-31 Smith-Waterman score: 558; 34.351identity in 262 aa overlap. Contains an in-frame stop codon after aa 71 ORF ftt0974
SNP36274	987442	848279	A	G	T	A	polar, hydrophilic, neutral	aliphatic, hydrophobic, neutral	Non-Conservative	MglA-regulated [15]	FTT0975	hypothetical protein	N\A	template	987157	987846		Weakly similar to Q83CZ8 Hypothetical protein Coxiella burnetii (227 aa) 76 opt: 235 Z-score: 276.0 bits: 58.3 E(): 1.8e-07 Smith-Waterman score: 235; 25.000 identity in 236 aa overlap. ORF ftt0975
SNP31450	991718	852550	A	G	I	V	aliphatic, hydrophobic, neutral	aliphatic, hydrophobic, neutral	Conservative	MglA-regulated [15]	FTT0980	Aminotransferase, class II	N\A	template	991133	992374	2.3.1.-	Similar to Q8UKI4 Aminotransferase, class II from Agrobacterium tumefaciens (413 aa). FASTA: opt: 486 Z-score: 559.2 E(): 2.7e-23 Smith-Waterman score: 554; 28.493 identity in 365 aa overlap ORF ftt0980
SNP130306	991766	852598	T	G	F	V	aromatic, hydrophobic, neutral	aliphatic, hydrophobic, neutral	Non-Conservative	MglA-regulated [15]	FTT0980	Aminotransferase, class II	N\A	template	991133	992374	2.3.1.-	Similar to Q8UKI4 Aminotransferase, class II from Agrobacterium tumefaciens (413 aa). FASTA: opt: 486 Z-score: 559.2 E(): 2.7e-23 Smith-Waterman score: 554; 28.493 identity in 365 aa overlap ORF ftt0980
SNP340968	991940	852772	C	T	P	S	hydrophobic, neutral	polar, hydrophilic, neutral	Non-Conservative	MglA-regulated [15]	FTT0980	Aminotransferase, class II	N\A	template	991133	992374	2.3.1.-	Similar to Q8UKI4 Aminotransferase, class II from Agrobacterium tumefaciens (413 aa). FASTA: opt: 486 Z-score: 559.2 E(): 2.7e-23 Smith-Waterman score: 554; 28.493 identity in 365 aa overlap ORF ftt0980
SNP49766	993053	853885	C	T	A	V	aliphatic, hydrophobic, neutral	aliphatic, hydrophobic, neutral	Conservative	MglA-regulated [15]	FTT0981	hypothetical protein	N\A	template	992707	993837		Weak homology to two-component sensory protein. ORF ftt0981
SNP62815	993345	854177	G	T	K	N	polar, hydrophilic, charged(+)	polar, hydrophilic, neutral	Non-Conservative	MglA-regulated [15]	FTT0981	hypothetical protein	N\A	template	992707	993837		Weak homology to two-component sensory protein. ORF ftt0981
SNP198720	993553	854385	T	C	Y	H	aromatic, hydrophobic, polar	aromatic, polar, hydrophilic, charged(+)	Non-Conservative	MglA-regulated [15]	FTT0981	hypothetical protein	N\A	template	992707	993837		Weak homology to two-component sensory protein. ORF ftt0981
SNP249235	997816	859424	G	A	G	D	aliphatic, neutral	polar, hydrophilic, charged(-)	Non-Conservative	MglA-regulated [15]	FTT0989	hypothetical protein	N\A	template	996927	998822		Similar to Q9I271 Hypothetical protein PA2044 from Pseudomonas aeruginosa (624 aa). FASTA: opt: 447 Z-score: 484.0 E(): 4.2e-19 Smith-Waterman score: 447; 22.203 identity in 572 aa overlap. ORF ftt0989
SNP179499	998265	859875	A	G	K	E	polar, hydrophilic, charged(+)	polar, hydrophilic, charged(-)	Non-Conservative	MglA-regulated [15]	FTT0989	hypothetical protein	N\A	template	996927	998822		Similar to Q9I271 Hypothetical protein PA2044 from Pseudomonas aeruginosa (624 aa). FASTA: opt: 447 Z-score: 484.0 E(): 4.2e-19 Smith-Waterman score: 447; 22.203 identity in 572 aa overlap. ORF ftt0989
SNP333344	1042407	904012	T	C	V	A	aliphatic, hydrophobic, neutral	aliphatic, hydrophobic, neutral	Conservative	MglA-regulated [15]	FTT1032	conserved hypothetical membrane protein,pseudogene	N\A	template	1042217	1042951		Similar to Q8FKS3 Putative oligogalacturonide transporter from Escherichia coli O6 (504 aa). FASTA: opt: 724 Z-score: 813.6 E(): 2e-37 Smith-Waterman score: 763; 30.675 identity in 489 aa overlap. Contains as in-frame stop codon ORF ftt1032
SNP135605	1044254	905859	C	A	T	K	polar, hydrophilic, neutral	polar, hydrophilic, charged(+)	Non-Conservative	MglA-regulated [15]	FTT1033	glycosyl hydrolases family 31 protein,pseudogene	yihQ	template	1043788	1044963	3.2.1.-	Similar to Q8ZKT9 Putative alpha-xylosidase from Salmonella typhimurium (678 aa). FASTA: opt: 2551 Z-score: 3058.2 E(): 1.9e-162 Smith-Waterman score: 2551; 54.364 identity in 653 aa overlap. Contains an in-frame stop codon
SNP5957	1044625	906230	C	T	P	S	hydrophobic, neutral	polar, hydrophilic, neutral	Non-Conservative	MglA-regulated [15]	FTT1033	glycosyl hydrolases family 31 protein,pseudogene	yihQ	template	1043788	1044963	3.2.1.-	Similar to Q8ZKT9 Putative alpha-xylosidase from Salmonella typhimurium (678 aa). FASTA: opt: 2551 Z-score: 3058.2 E(): 1.9e-162 Smith-Waterman score: 2551; 54.364 identity in 653 aa overlap. Contains an in-frame stop codon
SNP184888	1044730	906335	A	T	N	Y	polar, hydrophilic, neutral	aromatic, hydrophobic, polar	Non-Conservative	MglA-regulated [15]	FTT1033	glycosyl hydrolases family 31 protein,pseudogene	yihQ	template	1043788	1044963	3.2.1.-	Similar to Q8ZKT9 Putative alpha-xylosidase from Salmonella typhimurium (678 aa). FASTA: opt: 2551 Z-score: 3058.2 E(): 1.9e-162 Smith-Waterman score: 2551; 54.364 identity in 653 aa overlap. Contains an in-frame stop codon
SNP103444	1045486	907094	T	C	N	D	polar, hydrophilic, neutral	polar, hydrophilic, charged(-)	Non-Conservative	MglA-regulated [15]	FTT1034c	NADH dehydrogenase	ndh	complement	1045073	1046335	1.16.1.-	Similar to Q8UDU6 NADH dehydrogenase from Agrobacterium tumefaciens (strain C58 / ATCC 33970) (438 aa). FASTA: opt: 826 Z-score: 983.7 E(): 6.7e-47 Smith-Waterman score: 826; 32.854 identity in 417 aa overlap.
SNP185334	1045743	907351	A	T	L	H	aliphatic, hydrophobic, neutral	aromatic, polar, hydrophilic, charged(+)	Non-Conservative	MglA-regulated [15]	FTT1034c	NADH dehydrogenase	ndh	complement	1045073	1046335	1.16.1.-	Similar to Q8UDU6 NADH dehydrogenase from Agrobacterium tumefaciens (strain C58 / ATCC 33970) (438 aa). FASTA: opt: 826 Z-score: 983.7 E(): 6.7e-47 Smith-Waterman score: 826; 32.854 identity in 417 aa overlap.
SNP151043	1046194	907802	T	C	T	A	polar, hydrophilic, neutral	aliphatic, hydrophobic, neutral	Non-Conservative	MglA-regulated [15]	FTT1034c	NADH dehydrogenase	ndh	complement	1045073	1046335	1.16.1.-	Similar to Q8UDU6 NADH dehydrogenase from Agrobacterium tumefaciens (strain C58 / ATCC 33970) (438 aa). FASTA: opt: 826 Z-score: 983.7 E(): 6.7e-47 Smith-Waterman score: 826; 32.854 identity in 417 aa overlap.
SNP30100	1099241	1307015	T	C	L	P	aliphatic, hydrophobic, neutral	hydrophobic, neutral	Non-Conservative	MglA-regulated [15]	FTT1089	isochorismatase hydrolase family protein	N\A	template	1099213	1099734		Similar to Q8EW31 Hypothetical protein from Mycoplasma penetrans (194 aa). FASTA: opt: 235 Z-score: 294.7 E(): 1.6e-08 Smith-Waterman score: 235; 31.515 identity in 165 aa overlap. ORF ftt1089
SNP239023	1099305	1307079	A	T	L	F	aliphatic, hydrophobic, neutral	aromatic, hydrophobic, neutral	Non-Conservative	MglA-regulated [15]	FTT1089	isochorismatase hydrolase family protein	N\A	template	1099213	1099734		Similar to Q8EW31 Hypothetical protein from Mycoplasma penetrans (194 aa). FASTA: opt: 235 Z-score: 294.7 E(): 1.6e-08 Smith-Waterman score: 235; 31.515 identity in 165 aa overlap. ORF ftt1089
SNP164191	1100137	1307911	T	C	L	S	aliphatic, hydrophobic, neutral	polar, hydrophilic, neutral	Non-Conservative	MglA-regulated [15]	FTT1090	conserved hypothetical membrane protein	N\A	template	1099731	1100408		Similar to Q8A546 Putative membrane transporter involved in nicotinamide mononucleotide transport from Bacteroides thetaiotaomicron (188 aa). FASTA: opt: 285 Z-score: 336.8 E(): 7.2e-11 Smith-Waterman score: 302; 29.592 identity in 196 aa overlap. ORF ftt1090
SNP50533	1100403	1308177	A	G	R	G	polar, hydrophilic, charged(+)	aliphatic, neutral	Non-Conservative	MglA-regulated [15]	FTT1090	conserved hypothetical membrane protein	N\A	template	1099731	1100408		Similar to Q8A546 Putative membrane transporter involved in nicotinamide mononucleotide transport from Bacteroides thetaiotaomicron (188 aa). FASTA: opt: 285 Z-score: 336.8 E(): 7.2e-11 Smith-Waterman score: 302; 29.592 identity in 196 aa overlap. ORF ftt1090
SNP214090	1154839	1115787	G	A	A	T	aliphatic, hydrophobic, neutral	polar, hydrophilic, neutral	Non-Conservative	MglA-regulated [15]	FTT1141	conserved hypothetical protein, pseudogene	N\A	template	1154761	1154958		Similar to Q8PW11 Hypothetical protein MM1793 from Methanosarcina mazei (Methanosarcina frisia) (135 aa). FASTA: opt: 328 Z-score: 442.8 E(): 9e-17 Smith-Waterman score: 328; 50.000 identity in 96 aa overlap. CDS interrupted by an ISFtu1 element ORF ftt1141
SNP358238	1154857	1115805	A	G	T	A	polar, hydrophilic, neutral	aliphatic, hydrophobic, neutral	Non-Conservative	MglA-regulated [15]	FTT1141	conserved hypothetical protein, pseudogene	N\A	template	1154761	1154958		Similar to Q8PW11 Hypothetical protein MM1793 from Methanosarcina mazei (Methanosarcina frisia) (135 aa). FASTA: opt: 328 Z-score: 442.8 E(): 9e-17 Smith-Waterman score: 328; 50.000 identity in 96 aa overlap. CDS interrupted by an ISFtu1 element ORF ftt1141
SNP2110	1154911	1115859	A	G	S	G	polar, hydrophilic, neutral	aliphatic, neutral	Non-Conservative	MglA-regulated [15]	FTT1141	conserved hypothetical protein, pseudogene	N\A	template	1154761	1154958		Similar to Q8PW11 Hypothetical protein MM1793 from Methanosarcina mazei (Methanosarcina frisia) (135 aa). FASTA: opt: 328 Z-score: 442.8 E(): 9e-17 Smith-Waterman score: 328; 50.000 identity in 96 aa overlap. CDS interrupted by an ISFtu1 element ORF ftt1141
SNP302681	1156818	1117766	T	C	R	G	polar, hydrophilic, charged(+)	aliphatic, neutral	Non-Conservative	MglA-regulated [15]	FTT1146c	Aldose 1-epimerase (pseudogene)	galM	complement	1156663	1156908	5.1.3.3	Similar to EAA24361 (EAA24361) Aldose 1-epimerase (EC 5.1.3.3) from Fusobacterium nucleatum subsp. vincentii ATCC 49256 (330 aa). FASTA: opt: 574 Z-score: 714.1 E(): 6.9e-32 Smith-Waterman score: 574; 34.783 identity in 322 aa overlap. Contains a frameshift after aa 231, possibly caused by an internal deletion
SNP296979	1157392	1118340	A	G	F	L	aromatic, hydrophobic, neutral	aliphatic, hydrophobic, neutral	Non-Conservative	MglA-regulated [15]	FTT1146c	Aldose 1-epimerase (pseudogene)	galM	complement	1156907	1157641	5.1.3.3	Similar to EAA24361 (EAA24361) Aldose 1-epimerase (EC 5.1.3.3) from Fusobacterium nucleatum subsp. vincentii ATCC 49256 (330 aa). FASTA: opt: 574 Z-score: 714.1 E(): 6.9e-32 Smith-Waterman score: 574; 34.783 identity in 322 aa overlap. Contains a frameshift after aa 231, possibly caused by an internal deletion
SNP252791	1157635	1118583	C	T	V	I	aliphatic, hydrophobic, neutral	aliphatic, hydrophobic, neutral	Conservative	MglA-regulated [15]	FTT1146c	Aldose 1-epimerase (pseudogene)	galM	complement	1156907	1157641	5.1.3.3	Similar to EAA24361 (EAA24361) Aldose 1-epimerase (EC 5.1.3.3) from Fusobacterium nucleatum subsp. vincentii ATCC 49256 (330 aa). FASTA: opt: 574 Z-score: 714.1 E(): 6.9e-32 Smith-Waterman score: 574; 34.783 identity in 322 aa overlap. Contains a frameshift after aa 231, possibly caused by an internal deletion
SNP322491	1158344	1119292	A	G	V	A	aliphatic, hydrophobic, neutral	aliphatic, hydrophobic, neutral	Conservative	MglA-regulated [15]	FTT1147c	4'-phosphopantothenoylcysteine decarboxylase,phosphopantothenoylcysteine synthetase,FMN-binding (bifunctional protein)	dfp	complement	1157638	1158813	6.3.2.5	Similar to DFP_HAEIN (P44953) DNA/pantothenate metabolism flavoprotein homolog from Haemophilus influenzae (400 aa). FASTA: opt: 1012 Z-score: 1206.6 E(): 2.6e-59 Smith-Waterman score: 1012; 43.577identity in 397 aa overlap.
SNP225612	1158569	1119517	C	T	R	K	polar, hydrophilic, charged(+)	polar, hydrophilic, charged(+)	Conservative	MglA-regulated [15]	FTT1147c	4'-phosphopantothenoylcysteine decarboxylase,phosphopantothenoylcysteine synthetase,FMN-binding (bifunctional protein)	dfp	complement	1157638	1158813	6.3.2.5	Similar to DFP_HAEIN (P44953) DNA/pantothenate metabolism flavoprotein homolog from Haemophilus influenzae (400 aa). FASTA: opt: 1012 Z-score: 1206.6 E(): 2.6e-59 Smith-Waterman score: 1012; 43.577identity in 397 aa overlap.
SNP212787	1158708	1119656	A	C	F	V	aromatic, hydrophobic, neutral	aliphatic, hydrophobic, neutral	Non-Conservative	MglA-regulated [15]	FTT1147c	4'-phosphopantothenoylcysteine decarboxylase,phosphopantothenoylcysteine synthetase,FMN-binding (bifunctional protein)	dfp	complement	1157638	1158813	6.3.2.5	Similar to DFP_HAEIN (P44953) DNA/pantothenate metabolism flavoprotein homolog from Haemophilus influenzae (400 aa). FASTA: opt: 1012 Z-score: 1206.6 E(): 2.6e-59 Smith-Waterman score: 1012; 43.577identity in 397 aa overlap.
SNP326241	1196645	1157582	A	G	T	A	polar, hydrophilic, neutral	aliphatic, hydrophobic, neutral	Non-Conservative	MglA-regulated [15]	FTT1180	conserved hypothetical protein, pseudogene	N\A	template	1196330	1196653		Similar to Q8EXW1 Conserved hypothetical protein from Leptospira interrogans (250 aa). FASTA: opt: 528 Z-score: 655.2 E(): 1.3e-28 Smith-Waterman score: 528; 34.711 identity in 242 aa overlap. Contains an in-frame stop codon after aa 107 ORF ftt1180
SNP69942	1196905	1157842	A	T	L	F	aliphatic, hydrophobic, neutral	aromatic, hydrophobic, neutral	Non-Conservative	MglA-regulated [15]	FTT1180	conserved hypothetical protein, pseudogene	N\A	template	1196654	1197085		Similar to Q8EXW1 Conserved hypothetical protein from Leptospira interrogans (250 aa). FASTA: opt: 528 Z-score: 655.2 E(): 1.3e-28 Smith-Waterman score: 528; 34.711 identity in 242 aa overlap. Contains an in-frame stop codon after aa 107 ORF ftt1180
SNP119728	1207883	1168814	C	A	S	Y	polar, hydrophilic, neutral	aromatic, hydrophobic, polar	Non-Conservative	MglA-regulated [15]	FTT1191	Aminoacylase	N\A	template	1207486	1208646	3.5.1.14	Similar to Q8RFU4 N-acyl-L-amino acid amidohydrolase from Fusobacterium nucleatum (subsp. nucleatum) (393 aa). FASTA: opt: 945 Z-score: 1170.3 E(): 2.7e-57 Smith-Waterman score: 945; 38.259 identity in 379 aa overlap. ORF ftt1191
SNP61219	1212229	1171979	T	C	S	G	polar, hydrophilic, neutral	aliphatic, neutral	Non-Conservative	MglA-regulated [15]	FTT1195c	conserved hypothetical protein, pseudogene	N\A	complement	1211450	1212727		Similar to Q88JG1 Conserved hypothetical protein from Pseudomonas putida (strain KT2440) (469 aa). FASTA: opt: 1631 Z-score: 1944.7 E(): 2e-100 Smith-Waterman score: 1631; 52.903 identity in 465 aa overlap. Contains a frameshift at aa 59. Frameshift occurs at a heptanucleotide sequence and so could be part of a programmed translational frameshift ORF ftt1195c
SNP61770	1212273	1172023	A	C	I	R	aliphatic, hydrophobic, neutral	polar, hydrophilic, charged(+)	Non-Conservative	MglA-regulated [15]	FTT1195c	conserved hypothetical protein, pseudogene	N\A	complement	1211450	1212727		Similar to Q88JG1 Conserved hypothetical protein from Pseudomonas putida (strain KT2440) (469 aa). FASTA: opt: 1631 Z-score: 1944.7 E(): 2e-100 Smith-Waterman score: 1631; 52.903 identity in 465 aa overlap. Contains a frameshift at aa 59. Frameshift occurs at a heptanucleotide sequence and so could be part of a programmed translational frameshift ORF ftt1195c
SNP20813	1212631	1172381	A	G	C	R	polar, hydrophobic, neutral	polar, hydrophilic, charged(+)	Non-Conservative	MglA-regulated [15]	FTT1195c	conserved hypothetical protein, pseudogene	N\A	complement	1211450	1212727		Similar to Q88JG1 Conserved hypothetical protein from Pseudomonas putida (strain KT2440) (469 aa). FASTA: opt: 1631 Z-score: 1944.7 E(): 2e-100 Smith-Waterman score: 1631; 52.903 identity in 465 aa overlap. Contains a frameshift at aa 59. Frameshift occurs at a heptanucleotide sequence and so could be part of a programmed translational frameshift ORF ftt1195c
SNP125682	1227918	1187667	T	C	*	W		aromatic, hydrophobic, neutral	UnStop	MglA-regulated [15]	FTT1209c	metallopeptidase family M13 protein, pseudogene	N\A	complement	1227917	1229839	3.4.24.-	Similar to Q8EAQ3 Peptidase, M13 family from Shewanella oneidensis (694 aa). FASTA: opt: 1942 Z-score: 2116.8 E(): 4.7e-110 Smith-Waterman score: 1942; 44.688 identity in 640 aa overlap. This CDS lacks a start codon due to an interruption of an ISFtu1 element at the N-terminal end ORF ftt1209c
SNP184597	1228717	1188461	A	G	F	L	aromatic, hydrophobic, neutral	aliphatic, hydrophobic, neutral	Non-Conservative	MglA-regulated [15]	FTT1209c	metallopeptidase family M13 protein, pseudogene	N\A	complement	1227917	1229839	3.4.24.-	Similar to Q8EAQ3 Peptidase, M13 family from Shewanella oneidensis (694 aa). FASTA: opt: 1942 Z-score: 2116.8 E(): 4.7e-110 Smith-Waterman score: 1942; 44.688 identity in 640 aa overlap. This CDS lacks a start codon due to an interruption of an ISFtu1 element at the N-terminal end ORF ftt1209c
SNP343357	1228764	1188508	T	G	K	T	polar, hydrophilic, charged(+)	polar, hydrophilic, neutral	Non-Conservative	MglA-regulated [15]	FTT1209c	metallopeptidase family M13 protein, pseudogene	N\A	complement	1227917	1229839	3.4.24.-	Similar to Q8EAQ3 Peptidase, M13 family from Shewanella oneidensis (694 aa). FASTA: opt: 1942 Z-score: 2116.8 E(): 4.7e-110 Smith-Waterman score: 1942; 44.688 identity in 640 aa overlap. This CDS lacks a start codon due to an interruption of an ISFtu1 element at the N-terminal end ORF ftt1209c
SNP282148	1229187	1188931	G	A	S	L	polar, hydrophilic, neutral	aliphatic, hydrophobic, neutral	Non-Conservative	MglA-regulated [15]	FTT1209c	metallopeptidase family M13 protein, pseudogene	N\A	complement	1227917	1229839	3.4.24.-	Similar to Q8EAQ3 Peptidase, M13 family from Shewanella oneidensis (694 aa). FASTA: opt: 1942 Z-score: 2116.8 E(): 4.7e-110 Smith-Waterman score: 1942; 44.688 identity in 640 aa overlap. This CDS lacks a start codon due to an interruption of an ISFtu1 element at the N-terminal end ORF ftt1209c
SNP254636	1229797	1189541	T	C	I	V	aliphatic, hydrophobic, neutral	aliphatic, hydrophobic, neutral	Conservative	MglA-regulated [15]	FTT1209c	metallopeptidase family M13 protein, pseudogene	N\A	complement	1227917	1229839	3.4.24.-	Similar to Q8EAQ3 Peptidase, M13 family from Shewanella oneidensis (694 aa). FASTA: opt: 1942 Z-score: 2116.8 E(): 4.7e-110 Smith-Waterman score: 1942; 44.688 identity in 640 aa overlap. This CDS lacks a start codon due to an interruption of an ISFtu1 element at the N-terminal end ORF ftt1209c
SNP185365	1305498	552551	T	C	I	T	aliphatic, hydrophobic, neutral	polar, hydrophilic, neutral	Non-Conservative	MglA-regulated [15]	FTT1287	cystathionine beta-synthase (cystein synthase)	cbs	template	1305452	1306375	4.2.1.22	Similar to Q9BH24 Cystathionine beta-synthase 5 from Trypanosoma cruzi (384 aa). FASTA: opt: 540 Z-score: 651.0 E(): 2.3e-28 Smith-Waterman score: 542; 31.494 identity in 308 aa overlap.
SNP31605	1305845	552204	G	A	D	N	polar, hydrophilic, charged(-)	polar, hydrophilic, neutral	Non-Conservative	MglA-regulated [15]	FTT1287	cystathionine beta-synthase (cystein synthase)	cbs	template	1305452	1306375	4.2.1.22	Similar to Q9BH24 Cystathionine beta-synthase 5 from Trypanosoma cruzi (384 aa). FASTA: opt: 540 Z-score: 651.0 E(): 2.3e-28 Smith-Waterman score: 542; 31.494 identity in 308 aa overlap.
SNP273972	1306085	551964	T	C	Y	H	aromatic, hydrophobic, polar	aromatic, polar, hydrophilic, charged(+)	Non-Conservative	MglA-regulated [15]	FTT1287	cystathionine beta-synthase (cystein synthase)	cbs	template	1305452	1306375	4.2.1.22	Similar to Q9BH24 Cystathionine beta-synthase 5 from Trypanosoma cruzi (384 aa). FASTA: opt: 540 Z-score: 651.0 E(): 2.3e-28 Smith-Waterman score: 542; 31.494 identity in 308 aa overlap.
SNP39140	1306677	551364	G	A	E	K	polar, hydrophilic, charged(-)	polar, hydrophilic, charged(+)	Non-Conservative	MglA-regulated [15]	FTT1288	conserved hypothetical membrane protein	N\A	template	1306629	1307198		Similar to Q8Z651 Putative membrane protein from Salmonella typhi (204 aa). FASTA: opt: 462 Z-score: 553.9 E(): 5.9e-23 Smith-Waterman score: 462; 36.667 identity in 180 aa overlap. ORF ftt1288
SNP322238	1398787	526376	T	A	R	S	polar, hydrophilic, charged(+)	polar, hydrophilic, neutral	Non-Conservative	MglA-regulated [15]	FTT1357c	intracellular growth locus, subunit C	iglC	complement	1398673	1399308		Similar to AAP58964.1 (Q7X3J5) IglC (23 kDa protein) from Francisella novicida (211 aa). BLAST Score = 405, Expect = e-112 Identities = 209/211 (99), Positives = 210/211 (99) Identical to FTT1712. It is part of the duplicated region 1374371..1408281 which is identical to 1767715..1801625
SNP159920	1399141	526022	A	C	D	E	polar, hydrophilic, charged(-)	polar, hydrophilic, charged(-)	Conservative	MglA-regulated [15]	FTT1357c	intracellular growth locus, subunit C	iglC	complement	1398673	1399308		Similar to AAP58964.1 (Q7X3J5) IglC (23 kDa protein) from Francisella novicida (211 aa). BLAST Score = 405, Expect = e-112 Identities = 209/211 (99), Positives = 210/211 (99) Identical to FTT1712. It is part of the duplicated region 1374371..1408281 which is identical to 1767715..1801625
SNP33069	1399456	525707	C	T	E	K	polar, hydrophilic, charged(-)	polar, hydrophilic, charged(+)	Non-Conservative	MglA-regulated [15]	FTT1358c	intracellular growth locus, subunit B	iglB	complement	1399319	1400863		Similar to AAP58963.1 (Q7X3J4) IglB from Francisella novicida (514 aa). BLAST Score = 997, Expect = 0.0 Identities = 496/514 (96), Positives = 499/514 (97) Identical to FTT1713. It is part of the duplicated region 1374371..1408281 which is identical to 1767715..1801625
SNP167429	1433679	491463	T	C	S	P	polar, hydrophilic, neutral	hydrophobic, neutral	Non-Conservative	MglA-regulated [15]	FTT1388	hypothetical protein	N\A	template	1433568	1434284		Similar to AAO81619 (Q833S4) Conserved domain protein from Enterococcus faecalis (281 aa). FASTA: opt: 171 Z-score: 214.0 E(): 0.00046 Smith-Waterman score: 194;26.337 identity in 243 aa overlap ORF ftt1388
SNP117572	1434253	490889	T	C	V	A	aliphatic, hydrophobic, neutral	aliphatic, hydrophobic, neutral	Conservative	MglA-regulated [15]	FTT1388	hypothetical protein	N\A	template	1433568	1434284		Similar to AAO81619 (Q833S4) Conserved domain protein from Enterococcus faecalis (281 aa). FASTA: opt: 171 Z-score: 214.0 E(): 0.00046 Smith-Waterman score: 194;26.337 identity in 243 aa overlap ORF ftt1388
SNP170652	1587600	396769	A	G	I	M	aliphatic, hydrophobic, neutral	hydrophobic, neutral	Non-Conservative	MglA-regulated [15]	FTT1529	Acyl-CoA dehydrogenase	fadE	template	1587217	1589478	1.3.99.3	Similar to Q87QC0 Oxidoreductase, acyl-CoA dehydrogenase from Vibrio parahaemolyticus (760 aa). FASTA: opt: 2322 Z-score: 2681.1 E(): 1.7e-141 Smith-Waterman score: 2333; 46.817 identity in 754 aa overlap
SNP336371	1598735	385638	A	G	Y	H	aromatic, hydrophobic, polar	aromatic, polar, hydrophilic, charged(+)	Non-Conservative	MglA-regulated [15]	FTT1536c	hypothetical protein	N\A	complement	1598415	1599329		Similar to Q8RGP8 Hypothetical protein from Mycoplasma penetrans (310 aa). FASTA: opt: 805 Z-score: 956.1 E(): 2.1e-45 Smith-Waterman score: 805; 42.308 identity in 312 aa overlap ORF ftt1536c
SNP125465	1599279	385094	A	C	F	L	aromatic, hydrophobic, neutral	aliphatic, hydrophobic, neutral	Non-Conservative	MglA-regulated [15]	FTT1536c	hypothetical protein	N\A	complement	1598415	1599329		Similar to Q8RGP8 Hypothetical protein from Mycoplasma penetrans (310 aa). FASTA: opt: 805 Z-score: 956.1 E(): 2.1e-45 Smith-Waterman score: 805; 42.308 identity in 312 aa overlap ORF ftt1536c
SNP132056	1717896	1848326	T	C	N	S	polar, hydrophilic, neutral	polar, hydrophilic, neutral	Conservative	MglA-regulated [15]	FTT1650c	chorismate mutase	N\A	complement	1717577	1718125	5.4.99.5	Similar to Q93LJ4 Periplasmic monofunctional chorismate mutase from Salmonella typhimurium (181 aa). FASTA: opt: 186 Z-score: 223.0 E(): 0.00014 Smith-Waterman score: 186; 31.746 identity in 126 aa overlap ORF ftt1650
SNP153020	1718031	1848191	G	A	A	V	aliphatic, hydrophobic, neutral	aliphatic, hydrophobic, neutral	Conservative	MglA-regulated [15]	FTT1650c	chorismate mutase	N\A	complement	1717577	1718125	5.4.99.5	Similar to Q93LJ4 Periplasmic monofunctional chorismate mutase from Salmonella typhimurium (181 aa). FASTA: opt: 186 Z-score: 223.0 E(): 0.00014 Smith-Waterman score: 186; 31.746 identity in 126 aa overlap ORF ftt1650
SNP97029	1750211	1816165	G	A	R	H	polar, hydrophilic, charged(+)	aromatic, polar, hydrophilic, charged(+)	Non-Conservative	MglA-regulated [15]	FTT1682	conserved hypothetical protein, pseudogene	N\A	template	1750192	1750893		Similar to AAP08939 (Q81EK2) Hypothetical protein from Bacillus cereus (755 aa). FASTA: opt: 1438 Z-score: 1569.7 E(): 1.4e-79 Smith-Waterman score: 1459; 32.429 identity in 737 aa overlap. Contains a frameshift after aa 234 and an in-frame stop codon after aa 314 ORF ftt1682
SNP178929	1750261	1816116	C	T	P	S	hydrophobic, neutral	polar, hydrophilic, neutral	Non-Conservative	MglA-regulated [15]	FTT1682	conserved hypothetical protein, pseudogene	N\A	template	1750192	1750893		Similar to AAP08939 (Q81EK2) Hypothetical protein from Bacillus cereus (755 aa). FASTA: opt: 1438 Z-score: 1569.7 E(): 1.4e-79 Smith-Waterman score: 1459; 32.429 identity in 737 aa overlap. Contains a frameshift after aa 234 and an in-frame stop codon after aa 314 ORF ftt1682
SNP216477	1751390	1814987	G	A	E	K	polar, hydrophilic, charged(-)	polar, hydrophilic, charged(+)	Non-Conservative	MglA-regulated [15]	FTT1682	conserved hypothetical protein, pseudogene	N\A	template	1751138	1752499		Similar to AAP08939 (Q81EK2) Hypothetical protein from Bacillus cereus (755 aa). FASTA: opt: 1438 Z-score: 1569.7 E(): 1.4e-79 Smith-Waterman score: 1459; 32.429 identity in 737 aa overlap. Contains a frameshift after aa 234 and an in-frame stop codon after aa 314 ORF ftt1682
SNP207796	1751980	1814397	A	G	I	M	aliphatic, hydrophobic, neutral	hydrophobic, neutral	Non-Conservative	MglA-regulated [15]	FTT1682	conserved hypothetical protein, pseudogene	N\A	template	1751138	1752499		Similar to AAP08939 (Q81EK2) Hypothetical protein from Bacillus cereus (755 aa). FASTA: opt: 1438 Z-score: 1569.7 E(): 1.4e-79 Smith-Waterman score: 1459; 32.429 identity in 737 aa overlap. Contains a frameshift after aa 234 and an in-frame stop codon after aa 314 ORF ftt1682
SNP265940	1752443	1813934	G	A	V	M	aliphatic, hydrophobic, neutral	hydrophobic, neutral	Non-Conservative	MglA-regulated [15]	FTT1682	conserved hypothetical protein, pseudogene	N\A	template	1751138	1752499		Similar to AAP08939 (Q81EK2) Hypothetical protein from Bacillus cereus (755 aa). FASTA: opt: 1438 Z-score: 1569.7 E(): 1.4e-79 Smith-Waterman score: 1459; 32.429 identity in 737 aa overlap. Contains a frameshift after aa 234 and an in-frame stop codon after aa 314 ORF ftt1682
SNP165986	1822773	71878	C	A	G	V	aliphatic, neutral	aliphatic, hydrophobic, neutral	Non-Conservative	MglA-regulated [15]	FTT1734c	outer membrane associated protein, fragment	fopA1	complement	1822616	1823044		Similar to Q47938 Outer membrane protein from Francisella tularensis (336 aa). FASTA: opt: 516 Z-score: 592.2 E(): 3.9e-25 Smith-Waterman score: 516; 41.589 identity in 214 aa overlap. Contains an in-frame stop codon after aa 71 and truncation at C-terminal according to FASTA hits No transmembrane helix predicted.
SNP261837	1822891	71760	C	T	G	S	aliphatic, neutral	polar, hydrophilic, neutral	Non-Conservative	MglA-regulated [15]	FTT1734c	outer membrane associated protein, fragment	fopA1	complement	1822616	1823044		Similar to Q47938 Outer membrane protein from Francisella tularensis (336 aa). FASTA: opt: 516 Z-score: 592.2 E(): 3.9e-25 Smith-Waterman score: 516; 41.589 identity in 214 aa overlap. Contains an in-frame stop codon after aa 71 and truncation at C-terminal according to FASTA hits No transmembrane helix predicted.
SNP192743	1831644	62889	T	C	I	V	aliphatic, hydrophobic, neutral	aliphatic, hydrophobic, neutral	Conservative	MglA-regulated [15]	FTT1741c	NAD-dependent formate dehydrogenase, fragment	N\A	complement	1831354	1831794		Similar to Q9F7P9 Predicted NAD-dependent formate dehydrenase from Gamma-proteobacterium EBAC31A08 (398 aa). FASTA: opt: 740 Z-score: 987.4 E(): 4.2e-47 Smith-Waterman score: 740; 72.464 identity in 138 aa overlap. This CDS has no start codon due to truncation at N-terminal by the insertion of an ISFtu1 element ORF ftt1741c
SNP41422	1844263	1869786	A	G	I	M	aliphatic, hydrophobic, neutral	hydrophobic, neutral	Non-Conservative	MglA-regulated [15]	FTT1755	Succinate-semialdehyde dehydrogenase,pseudogene	gabD2	template	1843799	1844503		Similar to Q9SEK4 Succinic semialdehyde dehydrogenase from Arabidopsis thaliana (528 aa). FASTA: opt: 938 bits: 211.9 E(): 3e-53 Smith-Waterman score: 938; 53.381 identity in a 281 aa overlap. Contains a frameshift after aa 225. This CDS is also disrupted by the insertion of an ISFtu1 element occurring very near the C-terminal end.
SNP24669	1861433	11374	A	G	K	E	polar, hydrophilic, charged(+)	polar, hydrophilic, charged(-)	Non-Conservative	MglA-regulated [15]	FTT1771	hypothetical protein	N\A	template	1861370	1861723		ORF ftt1771
SNP202772	368398	1613876	G	T	P	H	hydrophobic, neutral	aromatic, polar, hydrophilic, charged(+)	Non-Conservative	Petrosino [12]	FTT0368c	virulence factor MviN	mviN	complement	368190	369734		Similar to AAO89943 (Q83ED5) Integral membrane protein MviN from Coxiella burnetii (515 aa). FASTA: opt: 836 Z-score: 887.1 E(): 1.6e-41 Smith-Waterman score: 836; 30.452 identity in 509 aa overlap
SNP270580	26754	111646	T	A	L	F	aliphatic, hydrophobic, neutral	aromatic, hydrophobic, neutral	Non-Conservative	Petrosino [12]	FTT0027c	diaminopimelate decarboxylase	lysA	complement	25842	27095	4.1.1.20	Similar to DCDA_BACSU (P23630) Diaminopimelate decarboxylase from Bacillus subtilis (441 aa). FASTA: opt: 437 Z-score: 538.0 E(): 4.5e-22 Smith-Waterman score: 437; 27.295 identity in 414 aa overlap
SNP231843	26987	111879	C	T	A	T	aliphatic, hydrophobic, neutral	polar, hydrophilic, neutral	Non-Conservative	Petrosino [12]	FTT0027c	diaminopimelate decarboxylase	lysA	complement	25842	27095	4.1.1.20	Similar to DCDA_BACSU (P23630) Diaminopimelate decarboxylase from Bacillus subtilis (441 aa). FASTA: opt: 437 Z-score: 538.0 E(): 4.5e-22 Smith-Waterman score: 437; 27.295 identity in 414 aa overlap
SNP326728	29478	114370	C	T	E	K	polar, hydrophilic, charged(-)	polar, hydrophilic, charged(+)	Non-Conservative	Petrosino [12]	FTT0029c	hypothetical protein	N\A	complement	28357	30276		Similar to AAO89973 (Q83EA5) FrgA protein from Coxiella burnetii (528 aa). FASTA: opt: 1047 Z-score: 1237.4 E(): 4.9e-61 Smith-Waterman score: 1053; 34.051 identity in 511 aa overlap ORF ftt0029c
SNP248369	30201	115093	C	T	A	T	aliphatic, hydrophobic, neutral	polar, hydrophilic, neutral	Non-Conservative	Petrosino [12]	FTT0029c	hypothetical protein	N\A	complement	28357	30276		Similar to AAO89973 (Q83EA5) FrgA protein from Coxiella burnetii (528 aa). FASTA: opt: 1047 Z-score: 1237.4 E(): 4.9e-61 Smith-Waterman score: 1053; 34.051 identity in 511 aa overlap ORF ftt0029c
SNP246980	66903	151804	C	T	P	L	hydrophobic, neutral	aliphatic, hydrophobic, neutral	Non-Conservative	Petrosino [12]	FTT0066	hypothetical protein	N\A	template	66836	69679		ORF ftt0066
SNP36475	67979	152880	T	C	S	P	polar, hydrophilic, neutral	hydrophobic, neutral	Non-Conservative	Petrosino [12]	FTT0066	hypothetical protein	N\A	template	66836	69679		ORF ftt0066
SNP190928	68960	153861	T	G	S	A	polar, hydrophilic, neutral	aliphatic, hydrophobic, neutral	Non-Conservative	Petrosino [12]	FTT0066	hypothetical protein	N\A	template	66836	69679		ORF ftt0066
SNP98713	69138	154039	G	A	G	D	aliphatic, neutral	polar, hydrophilic, charged(-)	Non-Conservative	Petrosino [12]	FTT0066	hypothetical protein	N\A	template	66836	69679		ORF ftt0066
SNP139623	86699	171597	A	G	F	L	aromatic, hydrophobic, neutral	aliphatic, hydrophobic, neutral	Non-Conservative	Petrosino [12]	FTT0084c	Oxygen-independent coproporphyrinogen III oxidase	hemN	complement	86193	87335		Similar to Q87V87 Oxygen-independent coproporphyrinogen III oxidase,putative,from Pseudomonas syringae (404 aa). FASTA: opt: 1156 Z-score: 1386.6 E(): 2.4e-69 Smith-Waterman score: 1156; 46.791 identity in 374 aa overlap
SNP307017	86903	171801	C	T	E	K	polar, hydrophilic, charged(-)	polar, hydrophilic, charged(+)	Non-Conservative	Petrosino [12]	FTT0084c	Oxygen-independent coproporphyrinogen III oxidase	hemN	complement	86193	87335		Similar to Q87V87 Oxygen-independent coproporphyrinogen III oxidase,putative,from Pseudomonas syringae (404 aa). FASTA: opt: 1156 Z-score: 1386.6 E(): 2.4e-69 Smith-Waterman score: 1156; 46.791 identity in 374 aa overlap
SNP101496	98117	183015	G	A	S	F	polar, hydrophilic, neutral	aromatic, hydrophobic, neutral	Non-Conservative	Petrosino [12]	FTT0094c	sensor histidine kinase	qseC	complement	97681	99108	2.7.3.-	Similar to AAO90737 (Q83CA0) Sensor histidine kinase from Coxiella burnetii (478 aa). FASTA: opt: 653 Z-score: 752.8 E(): 4.9e-34 Smith-Waterman score: 677; 29.083 identity in 447 aa overlap Sensory histidine kinase in two-component regulatory system with QseB, regulates flagella and motility by quorum sensing in E. coli, according to Q8X524
SNP132247	109256	193893	A	G	L	S	aliphatic, hydrophobic, neutral	polar, hydrophilic, neutral	Non-Conservative	Petrosino [12]	FTT0105c	Transporter AcrB/AcrD/AcrF family	N\A	complement	109207	112320		Similar to AAO90606 (Q83CM1) Transporter,AcrB/AcrD/AcrF family from Coxiella burnetii (1019 aa). FASTA: opt: 2662 Z-score: 2840.6 E(): 2.3e-150 Smith-Waterman score: 3071; 45.171identity in 1025 aa overlap ORF ftt0105c
SNP20074	110526	195163	T	C	I	V	aliphatic, hydrophobic, neutral	aliphatic, hydrophobic, neutral	Conservative	Petrosino [12]	FTT0105c	Transporter AcrB/AcrD/AcrF family	N\A	complement	109207	112320		Similar to AAO90606 (Q83CM1) Transporter,AcrB/AcrD/AcrF family from Coxiella burnetii (1019 aa). FASTA: opt: 2662 Z-score: 2840.6 E(): 2.3e-150 Smith-Waterman score: 3071; 45.171identity in 1025 aa overlap ORF ftt0105c
SNP361481	112433	197070	G	A	P	S	hydrophobic, neutral	polar, hydrophilic, neutral	Non-Conservative	Petrosino [12]	FTT0106c	Efflux protein, RND family, MFP subunit	N\A	complement	112320	113693		Similar to Q83CM0 Efflux transporter, RND family, MFP subunit from Coxiella burnetti (380 aa). FASTA: opt: 732 Z-score: 824.0 E(): 5.2e-38 Smith-Waterman score: 781; 34.748identity in 377 aa overlap ORF ftt0106c
SNP341413	113000	197637	T	C	T	A	polar, hydrophilic, neutral	aliphatic, hydrophobic, neutral	Non-Conservative	Petrosino [12]	FTT0106c	Efflux protein, RND family, MFP subunit	N\A	complement	112320	113693		Similar to Q83CM0 Efflux transporter, RND family, MFP subunit from Coxiella burnetti (380 aa). FASTA: opt: 732 Z-score: 824.0 E(): 5.2e-38 Smith-Waterman score: 781; 34.748identity in 377 aa overlap ORF ftt0106c
SNP247232	113441	198078	T	C	S	G	polar, hydrophilic, neutral	aliphatic, neutral	Non-Conservative	Petrosino [12]	FTT0106c	Efflux protein, RND family, MFP subunit	N\A	complement	112320	113693		Similar to Q83CM0 Efflux transporter, RND family, MFP subunit from Coxiella burnetti (380 aa). FASTA: opt: 732 Z-score: 824.0 E(): 5.2e-38 Smith-Waterman score: 781; 34.748identity in 377 aa overlap ORF ftt0106c
SNP138551	115905	200542	T	C	I	T	aliphatic, hydrophobic, neutral	polar, hydrophilic, neutral	Non-Conservative	Petrosino [12]	FTT0109	Lipid A transport protein, ABC transporter,ATP-binding and membrane protein	valA	template	115424	117253		lipid A transport protein, ABC transporter,ATP-binding and membrane protein. Similar to Q47908 ValA from Francisella novicida strain U112 (572 aa). FASTA: opt: 3334 Z-score: 3684.8 E(): 2.4e-197 Smith-Waterman score: 3334; 97.810 identity in 548 aa overlap (54-601:13-559). Similar to MSBA_HAEIN (P44407) Lipid A export ATP-binding protein from Haemophilus influenzae (587 aa). FASTA: opt: 1570 Z-sc…
SNP334134	135770	220408	A	G	I	M	aliphatic, hydrophobic, neutral	hydrophobic, neutral	Non-Conservative	Petrosino [12]	FTT0124	oligopeptide transporter, subunit C, ABC transporter, membrane protein, pseudogene	oppC	template	135753	135974		Similar to Q87MY7 Oligopeptide ABC transporter,permease frim Vibrio parahaemolyticus (300 aa). FASTA: opt: 1042 Z-score: 1224.8 E(): 2.3e-60 Smith-Waterman score: 1042; 52.857 identity in 280 aa overlap. Contains no start codon and a frameshift after aa 74
SNP133695	151853	236304	G	A	V	I	aliphatic, hydrophobic, neutral	aliphatic, hydrophobic, neutral	Conservative	Petrosino [12]	FTT0138	preprotein translocase, subunit E, membrane protein	secE	template	151421	151891		Similar to Q83ET6 Preprotein translocase, SecE subunit from Coxiella burnetii (127 aa). FASTA: 209 opt: 252 Z-score: 317.1 E(): 9e-10 Smith-Waterman score: 252; 37.795identity in 127 aa overlap Together with SecG and SecY forming an integral membrane complex.
SNP222767	171111	255562	G	T	A	S	aliphatic, hydrophobic, neutral	polar, hydrophilic, neutral	Non-Conservative	Petrosino [12]	FTT0155	oxidoreductase iron/ascorbate family protein	N\A	template	171078	171929	1.14.11.-	Similar to Q87HU0 Putative oxidoreductase iron/ascorbate from Vibrio parahaemolyticus (279 aa). FASTA: opt: 944 Z-score: 1155.0 E(): 1.9e-56 Smith-Waterman score: 944; 49.110 identity in 281 aa overlap ORF ftt0155
SNP5867	201094	1790280	C	T	H	Y	aromatic, polar, hydrophilic, charged(+)	aromatic, hydrophobic, polar	Non-Conservative	Petrosino [12]	FTT0185	D-alanine--D-alanine ligase B	ddlB	template	200770	201660	6.3.2.4	Similar to Q88N74 (Q88N74) D-alanine--D-alanine ligase B from Pseudomonas putida (318 aa). FASTA: opt: 761 Z-score: 911.3 E(): 7.3e-43 Smith-Waterman score: 761; 41.892 identity in 296 aa overlap
SNP152755	238001	1725171	A	G	K	E	polar, hydrophilic, charged(+)	polar, hydrophilic, charged(-)	Non-Conservative	Petrosino [12]	FTT0221	acid phosphatase (precursor)	acpA	template	237887	239431	3.1.4.3
SNP364415	240258	1727427	A	G	*	Q		polar, hydrophilic, neutral	UnStop	Petrosino [12]	FTT0223c	lactam utilization protein	ybgL	complement	240256	240954		Similar to Y993_PYRAB (Q9V005) Hypothetical UPF0271 protein PYRAB09930 from Pyrococcus abyssi (255 aa). FASTA: opt: 430 Z-score: 541.0 E(): 3e-22 Smith-Waterman score: 430; 35.294 identity in 238 aa overlap
SNP349518	258863	1731406	A	G	Y	C	aromatic, hydrophobic, polar	polar, hydrophobic, neutral	Non-Conservative	Petrosino [12]	FTT0245	universal stress protein	usp	template	258373	259209		Similar to Q8PWX4 Universal stress protein from Methanosarcina maizae (323 aa). FASTA: opt: 347 Z-score: 418.2 E(): 2.1e-15 Smith-Waterman score: 347; 31.849 identity in 292 aa overlap
SNP181560	262991	1749857	C	G	T	R	polar, hydrophilic, neutral	polar, hydrophilic, charged(+)	Non-Conservative	Petrosino [12]	FTT0249	ferrous iron transport protein	feoB	template	260995	263238		Similar to Q8ZJH5 Ferrous iron transport protein B from Yersinia pestis (771 aa). FASTA: opt: 1928 Z-score: 2034.7 E(): 1.9e-105 Smith-Waterman score: 2307; 45.396 identity in 771 aa overlap
SNP167736	263126	1749992	C	T	A	V	aliphatic, hydrophobic, neutral	aliphatic, hydrophobic, neutral	Conservative	Petrosino [12]	FTT0249	ferrous iron transport protein	feoB	template	260995	263238		Similar to Q8ZJH5 Ferrous iron transport protein B from Yersinia pestis (771 aa). FASTA: opt: 1928 Z-score: 2034.7 E(): 1.9e-105 Smith-Waterman score: 2307; 45.396 identity in 771 aa overlap
SNP88288	276104	1709964	G	A	V	I	aliphatic, hydrophobic, neutral	aliphatic, hydrophobic, neutral	Conservative	Petrosino [12]	FTT0259	hydroxymethylbilane synthase (porphobilinogen deaminase)	hemC	template	276044	276946	2.5.1.61	Similar to HEM3_ECOLI (P06983) Porphobilinogen deaminase from E.coli (313 aa). FASTA: opt: 991 Z-score: 1221.3 E(): 3.9e-60 Smith-Waterman score: 991; 54.698identity in 298 aa overlap
SNP67345	276123	1709983	T	C	L	S	aliphatic, hydrophobic, neutral	polar, hydrophilic, neutral	Non-Conservative	Petrosino [12]	FTT0259	hydroxymethylbilane synthase (porphobilinogen deaminase)	hemC	template	276044	276946	2.5.1.61	Similar to HEM3_ECOLI (P06983) Porphobilinogen deaminase from E.coli (313 aa). FASTA: opt: 991 Z-score: 1221.3 E(): 3.9e-60 Smith-Waterman score: 991; 54.698identity in 298 aa overlap
SNP344568	285912	1720083	T	C	L	S	aliphatic, hydrophobic, neutral	polar, hydrophilic, neutral	Non-Conservative	Petrosino [12]	FTT0270	lipoprotein releasing system, subunit B, outer membrane lipoprotein	lolB	template	285584	286219		Similar to Q83AQ2 Outer membrane lipoprotein LolB,putative from Coxiella burnetii (210 aa). FASTA: opt: 395 Z-score: 508.7 E(): 1.9e-20 Smith-Waterman score: 395; 33.668 identity in 199 aa overlap
SNP149541	301097	1690572	C	T	D	N	polar, hydrophilic, charged(-)	polar, hydrophilic, neutral	Non-Conservative	Petrosino [12]	FTT0286c	UDP-3-O-[3-hydroxymyristoyl] glucosamine N-acyltransferase	lpxD1	complement	300609	301652	2.3.1.-	Similar to Q8A014 UDP-3-O-[3-hydroxymyristoyl] glucosamine N-acyltransferase from Bacteroides thetaiotaomicron (346 aa). FASTA: opt: 687 Z-score: 795.8 E(): 2e-36 Smith-Waterman score: 687; 33.431 identity in 341 aa overlap paralog of FTT1571
SNP7328	301120	1690549	C	T	C	Y	polar, hydrophobic, neutral	aromatic, hydrophobic, polar	Non-Conservative	Petrosino [12]	FTT0286c	UDP-3-O-[3-hydroxymyristoyl] glucosamine N-acyltransferase	lpxD1	complement	300609	301652	2.3.1.-	Similar to Q8A014 UDP-3-O-[3-hydroxymyristoyl] glucosamine N-acyltransferase from Bacteroides thetaiotaomicron (346 aa). FASTA: opt: 687 Z-score: 795.8 E(): 2e-36 Smith-Waterman score: 687; 33.431 identity in 341 aa overlap paralog of FTT1571
SNP14188	301162	1690507	A	G	I	T	aliphatic, hydrophobic, neutral	polar, hydrophilic, neutral	Non-Conservative	Petrosino [12]	FTT0286c	UDP-3-O-[3-hydroxymyristoyl] glucosamine N-acyltransferase	lpxD1	complement	300609	301652	2.3.1.-	Similar to Q8A014 UDP-3-O-[3-hydroxymyristoyl] glucosamine N-acyltransferase from Bacteroides thetaiotaomicron (346 aa). FASTA: opt: 687 Z-score: 795.8 E(): 2e-36 Smith-Waterman score: 687; 33.431 identity in 341 aa overlap paralog of FTT1571
SNP140224	301277	1690392	T	C	S	G	polar, hydrophilic, neutral	aliphatic, neutral	Non-Conservative	Petrosino [12]	FTT0286c	UDP-3-O-[3-hydroxymyristoyl] glucosamine N-acyltransferase	lpxD1	complement	300609	301652	2.3.1.-	Similar to Q8A014 UDP-3-O-[3-hydroxymyristoyl] glucosamine N-acyltransferase from Bacteroides thetaiotaomicron (346 aa). FASTA: opt: 687 Z-score: 795.8 E(): 2e-36 Smith-Waterman score: 687; 33.431 identity in 341 aa overlap paralog of FTT1571
SNP71638	301564	1690105	G	T	T	N	polar, hydrophilic, neutral	polar, hydrophilic, neutral	Conservative	Petrosino [12]	FTT0286c	UDP-3-O-[3-hydroxymyristoyl] glucosamine N-acyltransferase	lpxD1	complement	300609	301652	2.3.1.-	Similar to Q8A014 UDP-3-O-[3-hydroxymyristoyl] glucosamine N-acyltransferase from Bacteroides thetaiotaomicron (346 aa). FASTA: opt: 687 Z-score: 795.8 E(): 2e-36 Smith-Waterman score: 687; 33.431 identity in 341 aa overlap paralog of FTT1571
SNP223637	346697	1645180	A	G	T	A	polar, hydrophilic, neutral	aliphatic, hydrophobic, neutral	Non-Conservative	Petrosino [12]	FTT0345	preprotein translocase, subunit Y, membrane protein	secY	template	346535	347860		Similar to SECY_ECOLI (P03844) Preprotein translocase secY subunit from Escherichia coli (443 aa). FASTA: opt: 1706 Z-score: 1921.6 E(): 3.8e-99 Smith-Waterman score: 1706; 59.497 identity in 437 aa overlap Together with SecE and SecG forming an integral membrane complex.
SNP225974	355767	1638290	T	C	S	P	polar, hydrophilic, neutral	hydrophobic, neutral	Non-Conservative	Petrosino [12]	FTT0356	Chaperone Hsp90, heat shock protein HtpG	htpG	template	355152	357038		Similar to AAO89866 (Q83EL0) Heat shock protein HtpG from Coxiella burnetii (633 aa). FASTA: opt: 2277 Z-score: 2422.9 bits: 458.5 E(): 4.6e-127 Smith-Waterman score: 2277; 54.792 identity in 626 aa overlap
SNP140703	356629	1639152	G	A	R	K	polar, hydrophilic, charged(+)	polar, hydrophilic, charged(+)	Conservative	Petrosino [12]	FTT0356	Chaperone Hsp90, heat shock protein HtpG	htpG	template	355152	357038		Similar to AAO89866 (Q83EL0) Heat shock protein HtpG from Coxiella burnetii (633 aa). FASTA: opt: 2277 Z-score: 2422.9 bits: 458.5 E(): 4.6e-127 Smith-Waterman score: 2277; 54.792 identity in 626 aa overlap
SNP13453	448081	1544402	A	T	K	N	polar, hydrophilic, charged(+)	polar, hydrophilic, neutral	Non-Conservative	Petrosino [12]	FTT0434	hypothetical protein	N\A	template	447896	448882		Similar to Q8KCB6 Hypothetical protein CT1508 from Chlorobium tepidum (347 aa). FASTA: opt: 742 Z-score: 939.4 E(): 2e-44 Smith-Waterman score: 837; 38.484 identity in 343 aa overlap PAD_porph is a possible virulence factor for P. gingivalis: PMID: 10377098 ORF ftt0434
SNP229083	448491	1543992	G	A	R	H	polar, hydrophilic, charged(+)	aromatic, polar, hydrophilic, charged(+)	Non-Conservative	Petrosino [12]	FTT0434	hypothetical protein	N\A	template	447896	448882		Similar to Q8KCB6 Hypothetical protein CT1508 from Chlorobium tepidum (347 aa). FASTA: opt: 742 Z-score: 939.4 E(): 2e-44 Smith-Waterman score: 837; 38.484 identity in 343 aa overlap PAD_porph is a possible virulence factor for P. gingivalis: PMID: 10377098 ORF ftt0434
SNP34988	448652	1543831	C	A	Q	K	polar, hydrophilic, neutral	polar, hydrophilic, charged(+)	Non-Conservative	Petrosino [12]	FTT0434	hypothetical protein	N\A	template	447896	448882		Similar to Q8KCB6 Hypothetical protein CT1508 from Chlorobium tepidum (347 aa). FASTA: opt: 742 Z-score: 939.4 E(): 2e-44 Smith-Waterman score: 837; 38.484 identity in 343 aa overlap PAD_porph is a possible virulence factor for P. gingivalis: PMID: 10377098 ORF ftt0434
SNP240838	449772	1542711	C	T	A	T	aliphatic, hydrophobic, neutral	polar, hydrophilic, neutral	Non-Conservative	Petrosino [12]	FTT0436c	UDP-2,3-diacylglucosamine hydrolase	lpxH	complement	449761	450477	3.6.1.-	Similar to Q87YP9 UDP-2,3-diacylglucosamine hydrolase from Pseudomonas syringae (248 aa). FASTA: 374 opt: 569 Z-score: 703.6 bits: 137.6 E(): 2.7e-31 Smith-Waterman score: 569; 38.528 identity (40.0900ngapped) in 231 aa overlap (7-229:2-231)
SNP335584	449912	1542571	T	C	Y	C	aromatic, hydrophobic, polar	polar, hydrophobic, neutral	Non-Conservative	Petrosino [12]	FTT0436c	UDP-2,3-diacylglucosamine hydrolase	lpxH	complement	449761	450477	3.6.1.-	Similar to Q87YP9 UDP-2,3-diacylglucosamine hydrolase from Pseudomonas syringae (248 aa). FASTA: 374 opt: 569 Z-score: 703.6 bits: 137.6 E(): 2.7e-31 Smith-Waterman score: 569; 38.528 identity (40.0900ngapped) in 231 aa overlap (7-229:2-231)
SNP30496	484865	1507659	A	G	I	M	aliphatic, hydrophobic, neutral	hydrophobic, neutral	Non-Conservative	Petrosino [12]	FTT0467	organic solvent tolerance protein	ostA1	template	483861	486467		Similar to OSTA_XYLFT (Q87AI9) Organic solvent tolerance protein from Xylella fastidiosa (792 aa). FASTA: opt: 700 Z-score: 808.7 E(): 3.7e-37 Smith-Waterman score: 775; 26.572 identity in 636 aa overlap
SNP91926	485058	1507466	G	A	A	T	aliphatic, hydrophobic, neutral	polar, hydrophilic, neutral	Non-Conservative	Petrosino [12]	FTT0467	organic solvent tolerance protein	ostA1	template	483861	486467		Similar to OSTA_XYLFT (Q87AI9) Organic solvent tolerance protein from Xylella fastidiosa (792 aa). FASTA: opt: 700 Z-score: 808.7 E(): 3.7e-37 Smith-Waterman score: 775; 26.572 identity in 636 aa overlap
SNP229984	487358	1505166	T	G	Y	D	aromatic, hydrophobic, polar	polar, hydrophilic, charged(-)	Non-Conservative	Petrosino [12]	FTT0468	Peptidyl-prolyl cis-trans isomerase (PPIase)	surA	template	486449	487870	5.2.1.8	Similar to Q8ZIK4 Survival protein SurA (Peptidyl-prolyl cis-trans isomerase) from Yersinia pestis (434 aa). FASTA: opt: 532 Z-score: 586.9 E(): 8.4e-25 Smith-Waterman score: 532; 25.176 identity in 425 aa overlap
SNP26358	487569	1504955	A	G	K	R	polar, hydrophilic, charged(+)	polar, hydrophilic, charged(+)	Conservative	Petrosino [12]	FTT0468	Peptidyl-prolyl cis-trans isomerase (PPIase)	surA	template	486449	487870	5.2.1.8	Similar to Q8ZIK4 Survival protein SurA (Peptidyl-prolyl cis-trans isomerase) from Yersinia pestis (434 aa). FASTA: opt: 532 Z-score: 586.9 E(): 8.4e-25 Smith-Waterman score: 532; 25.176 identity in 425 aa overlap
SNP197386	487577	1504947	T	G	S	A	polar, hydrophilic, neutral	aliphatic, hydrophobic, neutral	Non-Conservative	Petrosino [12]	FTT0468	Peptidyl-prolyl cis-trans isomerase (PPIase)	surA	template	486449	487870	5.2.1.8	Similar to Q8ZIK4 Survival protein SurA (Peptidyl-prolyl cis-trans isomerase) from Yersinia pestis (434 aa). FASTA: opt: 532 Z-score: 586.9 E(): 8.4e-25 Smith-Waterman score: 532; 25.176 identity in 425 aa overlap
SNP188158	488329	1504195	C	A	S	Y	polar, hydrophilic, neutral	aromatic, hydrophobic, polar	Non-Conservative	Petrosino [12]	FTT0469	dimethyladenosine transferase , kasugamycin resistance	ksgA	template	487872	488660	2.1.1.-	Similar to KSGA_XYLFT (Q87C85) Dimethyladenosine transferase from Xylella fastidiosa (strain Temecula1 / ATCC 700964) (265 aa). FASTA: opt: 686 Z-score: 828.3 E(): 3e-38 Smith-Waterman score: 686; 43.411 identity in 258 aa overlap
SNP256930	507049	1485475	C	A	P	T	hydrophobic, neutral	polar, hydrophilic, neutral	Non-Conservative	Petrosino [12]	FTT0487	hypothetical membrane protein	N\A	template	507022	507756		Similar to Q83AI9 Membrane protein,putative from Coxiella burnetii (401 aa). FASTA: 306 opt: 370 Z-score: 417.4 E(): 2.3e-15 Smith-Waterman score: 370; 30.342 identity in 234 aa overlap ORF ftt0487
SNP138256	507193	1485331	A	G	K	E	polar, hydrophilic, charged(+)	polar, hydrophilic, charged(-)	Non-Conservative	Petrosino [12]	FTT0487	hypothetical membrane protein	N\A	template	507022	507756		Similar to Q83AI9 Membrane protein,putative from Coxiella burnetii (401 aa). FASTA: 306 opt: 370 Z-score: 417.4 E(): 2.3e-15 Smith-Waterman score: 370; 30.342 identity in 234 aa overlap ORF ftt0487
SNP232367	507517	1485007	G	A	V	I	aliphatic, hydrophobic, neutral	aliphatic, hydrophobic, neutral	Conservative	Petrosino [12]	FTT0487	hypothetical membrane protein	N\A	template	507022	507756		Similar to Q83AI9 Membrane protein,putative from Coxiella burnetii (401 aa). FASTA: 306 opt: 370 Z-score: 417.4 E(): 2.3e-15 Smith-Waterman score: 370; 30.342 identity in 234 aa overlap ORF ftt0487
SNP348357	507709	1484815	T	C	S	P	polar, hydrophilic, neutral	hydrophobic, neutral	Non-Conservative	Petrosino [12]	FTT0487	hypothetical membrane protein	N\A	template	507022	507756		Similar to Q83AI9 Membrane protein,putative from Coxiella burnetii (401 aa). FASTA: 306 opt: 370 Z-score: 417.4 E(): 2.3e-15 Smith-Waterman score: 370; 30.342 identity in 234 aa overlap ORF ftt0487
SNP317039	509291	1483234	C	T	G	D	aliphatic, neutral	polar, hydrophilic, charged(-)	Non-Conservative	Petrosino [12]	FTT0489c	thioredoxin reductase	trxB	complement	509038	509988	1.8.1.9	Similar to Q8ZGC9 Thioredoxin reductase from Yersinia pestis (320 aa). FASTA: opt: 1525 Z-score: 1798.2 E(): 2.9e-92 Smith-Waterman score: 1525; 70.927 identity in 313 aa overlap
SNP303814	509844	1482681	A	C	Y	D	aromatic, hydrophobic, polar	polar, hydrophilic, charged(-)	Non-Conservative	Petrosino [12]	FTT0489c	thioredoxin reductase	trxB	complement	509038	509988	1.8.1.9	Similar to Q8ZGC9 Thioredoxin reductase from Yersinia pestis (320 aa). FASTA: opt: 1525 Z-score: 1798.2 E(): 2.9e-92 Smith-Waterman score: 1525; 70.927 identity in 313 aa overlap
SNP18673	510477	1482048	T	G	N	T	polar, hydrophilic, neutral	polar, hydrophilic, neutral	Conservative	Petrosino [12]	FTT0490c	Phospholipase D family protein.	N\A	complement	510080	511297	3.1.1.-	Similar Q888K0 Phospholipase D family protein from Pseudomonas syringae (pv. tomato) (422 aa). FASTA: opt: 440 Z-score: 514.4 E(): 9.2e-21 Smith-Waterman score: 440; 25.840 identity in 387 aa overlap ORF ftt0490c
SNP289161	554694	959462	G	T	P	Q	hydrophobic, neutral	polar, hydrophilic, neutral	Non-Conservative	Petrosino [12]	FTT0533c	Glutaredoxin 1	grxA	complement	554468	554728		Similar to GLR1_ECOLI (P00277) Glutaredoxin 1 from Escherichia coli (85 aa). FASTA: opt: 191 Z-score: 274.9 E(): 2e-07 Smith-Waterman score: 191; 40.000identity in 80 aa overlap
SNP15481	562631	951525	T	C	L	P	aliphatic, hydrophobic, neutral	hydrophobic, neutral	Non-Conservative	Petrosino [12]	FTT0542	AhpC/Tsa family protein, pseudogene	N\A	template	562606	562929		Similar to Q88NW9 Antioxidant,AhpC/Tsa family from Pseudomonas putida (200 aa). FASTA: opt: 979 Z-score: 1280.5 E(): 2e-63 Smith-Waterman score: 979; 72.680 identity in 194 aa overlap. Contains a frameshift after aa 108 unknown EC_number 1.6.4.- ORF ftt0542
SNP283684	563031	951135	A	G	N	D	polar, hydrophilic, neutral	polar, hydrophilic, charged(-)	Non-Conservative	Petrosino [12]	FTT0542	AhpC/Tsa family protein, pseudogene	N\A	template	562929	563204		Similar to Q88NW9 Antioxidant,AhpC/Tsa family from Pseudomonas putida (200 aa). FASTA: opt: 979 Z-score: 1280.5 E(): 2e-63 Smith-Waterman score: 979; 72.680 identity in 194 aa overlap. Contains a frameshift after aa 108 unknown EC_number 1.6.4.- ORF ftt0542
SNP10539	563160	951016	C	T	Q	*	polar, hydrophilic, neutral		Stop	Petrosino [12]	FTT0542	AhpC/Tsa family protein, pseudogene	N\A	template	562929	563204		Similar to Q88NW9 Antioxidant,AhpC/Tsa family from Pseudomonas putida (200 aa). FASTA: opt: 979 Z-score: 1280.5 E(): 2e-63 Smith-Waterman score: 979; 72.680 identity in 194 aa overlap. Contains a frameshift after aa 108 unknown EC_number 1.6.4.- ORF ftt0542
SNP231210	591154	1345811	A	G	D	G	polar, hydrophilic, charged(-)	aliphatic, neutral	Non-Conservative	Petrosino [12]	FTT0573	alanine racemase	alr	template	590358	591455	5.1.1.1	Similar to Q81EB9 Alanine racemase from Bacillus cereus (408 aa). FASTA: opt: 573 Z-score: 679.1 E(): 6.2e-30 Smith-Waterman score: 573; 29.863 identity in 365 aa overlap
SNP271172	591276	1345689	G	A	G	S	aliphatic, neutral	polar, hydrophilic, neutral	Non-Conservative	Petrosino [12]	FTT0573	alanine racemase	alr	template	590358	591455	5.1.1.1	Similar to Q81EB9 Alanine racemase from Bacillus cereus (408 aa). FASTA: opt: 573 Z-score: 679.1 E(): 6.2e-30 Smith-Waterman score: 573; 29.863 identity in 365 aa overlap
SNP216403	642391	1047756	T	C	S	P	polar, hydrophilic, neutral	hydrophobic, neutral	Non-Conservative	Petrosino [12]	FTT0623	trigger factor (TF) protein (peptidyl-prolyl cis/trans isomerase)	tig	template	641398	642714	5.2.1.8	Similar to Q87YR5 Trigger factor from Pseudomonas syringae (436 aa). FASTA: opt: 1144 Z-score: 1126.0 E(): 7.9e-55 Smith-Waterman score: 1144; 39.041 identity in 438 aa overlap. Molecular chaperone involved in cell division.
SNP145481	643745	1046402	C	T	A	V	aliphatic, hydrophobic, neutral	aliphatic, hydrophobic, neutral	Conservative	Petrosino [12]	FTT0625	ATP-dependent Clp protease subunit X	clpX	template	643369	644622		Similar to CLPX_BACHD ATP-dependent Clp protease ATP-binding subunit clpX from Bacillus halodurans (424 aa). FASTA: opt: 1681 Z-score: 1809.7 E(): 6.5e-93 Smith-Waterman score: 1681; 62.189 identity in 402 aa overlap.
SNP67015	644158	1045989	T	G	S	A	polar, hydrophilic, neutral	aliphatic, hydrophobic, neutral	Non-Conservative	Petrosino [12]	FTT0625	ATP-dependent Clp protease subunit X	clpX	template	643369	644622		Similar to CLPX_BACHD ATP-dependent Clp protease ATP-binding subunit clpX from Bacillus halodurans (424 aa). FASTA: opt: 1681 Z-score: 1809.7 E(): 6.5e-93 Smith-Waterman score: 1681; 62.189 identity in 402 aa overlap.
SNP353176	644656	1045491	T	C	S	P	polar, hydrophilic, neutral	hydrophobic, neutral	Non-Conservative	Petrosino [12]	FTT0626	DNA-binding, ATP-dependent protease La	lon	template	644647	646971	3.4.21.53	Similar to Q8Z8V0 Lon protease from Salmonella typhi (784 aa). FASTA: opt: 2734 Z-score: 2797.3 E(): 6.4e-148 Smith-Waterman score: 2734; 54.450 identity in 764 aa overlap.
SNP159532	645131	1045016	T	C	M	T	hydrophobic, neutral	polar, hydrophilic, neutral	Non-Conservative	Petrosino [12]	FTT0626	DNA-binding, ATP-dependent protease La	lon	template	644647	646971	3.4.21.53	Similar to Q8Z8V0 Lon protease from Salmonella typhi (784 aa). FASTA: opt: 2734 Z-score: 2797.3 E(): 6.4e-148 Smith-Waterman score: 2734; 54.450 identity in 764 aa overlap.
SNP226638	646715	1043432	C	T	A	V	aliphatic, hydrophobic, neutral	aliphatic, hydrophobic, neutral	Conservative	Petrosino [12]	FTT0626	DNA-binding, ATP-dependent protease La	lon	template	644647	646971	3.4.21.53	Similar to Q8Z8V0 Lon protease from Salmonella typhi (784 aa). FASTA: opt: 2734 Z-score: 2797.3 E(): 6.4e-148 Smith-Waterman score: 2734; 54.450 identity in 764 aa overlap.
SNP167728	672607	1017549	A	G	F	L	aromatic, hydrophobic, neutral	aliphatic, hydrophobic, neutral	Non-Conservative	Petrosino [12]	FTT0652c	Ferritin-like protein	ftnA	complement	672533	673030		Similar to Q899N4 Ferritin from Clostridium tetani (169 aa). FASTA: opt: 527 Z-score: 679.5 E(): 5.9e-30 Smith-Waterman score: 527; 45.783identity in 166 aa overlap.
SNP197356	672751	1017403	T	C	K	E	polar, hydrophilic, charged(+)	polar, hydrophilic, charged(-)	Non-Conservative	Petrosino [12]	FTT0652c	Ferritin-like protein	ftnA	complement	672533	673030		Similar to Q899N4 Ferritin from Clostridium tetani (169 aa). FASTA: opt: 527 Z-score: 679.5 E(): 5.9e-30 Smith-Waterman score: 527; 45.783identity in 166 aa overlap.
SNP231609	673009	1017145	A	C	Y	D	aromatic, hydrophobic, polar	polar, hydrophilic, charged(-)	Non-Conservative	Petrosino [12]	FTT0652c	Ferritin-like protein	ftnA	complement	672533	673030		Similar to Q899N4 Ferritin from Clostridium tetani (169 aa). FASTA: opt: 527 Z-score: 679.5 E(): 5.9e-30 Smith-Waterman score: 527; 45.783identity in 166 aa overlap.
SNP156205	706776	983363	T	C	N	D	polar, hydrophilic, neutral	polar, hydrophilic, charged(-)	Non-Conservative	Petrosino [12]	FTT0688c	ATP-dependent protease, proteasome-related peptidase subunit	hslV	complement	706537	707088	3.4.25.-	Similar to Q83A95 Protease HslVU, subunit HslV from Coxiella burnetii (181 aa). FASTA: opt: 699 Z-score: 897.9 E(): 4e-42 Smith-Waterman score: 699; 60.221 identity in 181 aa overlap.
SNP54243	725639	1442198	T	G	L	V	aliphatic, hydrophobic, neutral	aliphatic, hydrophobic, neutral	Conservative	Petrosino [12]	FTT0707	nicotinamide mononucleotide transport (NMT) family protein	N\A	template	725384	726178		Similar to Q9CK00 Hypothetical protein PM1838 from Pasteurella multocida (234 aa). FASTA: opt: 456 Z-score: 507.2 E(): 2.3e-20 Smith-Waterman score: 456; 34.483identity in 232 aa overlap. ORF ftt0707
SNP136638	735108	1432727	T	C	I	T	aliphatic, hydrophobic, neutral	polar, hydrophilic, neutral	Non-Conservative	Petrosino [12]	FTT0715	chitinase family 18 protein	N\A	template	734051	736333	3.2.1.-	Similar to Q9ZIX2 Chitinase c from Pseudoalteromonas sp. S9 (869 aa). FASTA: opt: 331 Z-score: 370.4 E(): 9.6e-13 Smith-Waterman score: 583; 24.111 identity in 900 aa overlap. The homologs are of varying sizes. ORF ftt0715
SNP292650	735872	1431963	A	G	K	E	polar, hydrophilic, charged(+)	polar, hydrophilic, charged(-)	Non-Conservative	Petrosino [12]	FTT0715	chitinase family 18 protein	N\A	template	734051	736333	3.2.1.-	Similar to Q9ZIX2 Chitinase c from Pseudoalteromonas sp. S9 (869 aa). FASTA: opt: 331 Z-score: 370.4 E(): 9.6e-13 Smith-Waterman score: 583; 24.111 identity in 900 aa overlap. The homologs are of varying sizes. ORF ftt0715
SNP262065	742586	1425014	C	T	A	T	aliphatic, hydrophobic, neutral	polar, hydrophilic, neutral	Non-Conservative	Petrosino [12]	FTT0721c	Peroxidase/catalase	katG	complement	741201	743426	1.11.1.6	Similar to CATA_YERPE (Q9X6B0) Peroxidase/catalase (EC 1.11.1.6) from Yersinia pestis (737 aa). FASTA: opt: 3041 Z-score: 3508.0 E(): 1.7e-187 Smith-Waterman score: 3041; 59.189 identity in 740 aa overlap.
SNP62397	788980	1371904	A	C	R	S	polar, hydrophilic, charged(+)	polar, hydrophilic, neutral	Non-Conservative	Petrosino [12]	FTT0769	preprotein translocase, subunit A, ATPase secretion protein	secA	template	788288	791008		Similar to Q87SF7 SecA protein from Vibrio parahaemolyticus (908 aa). FASTA: opt: 3541 Z-score: 3857.5 E(): 5.7e-207 Smith-Waterman score: 3541; 58.416 identity in 909 aa overlap.
SNP145361	789377	1371507	A	G	I	V	aliphatic, hydrophobic, neutral	aliphatic, hydrophobic, neutral	Conservative	Petrosino [12]	FTT0769	preprotein translocase, subunit A, ATPase secretion protein	secA	template	788288	791008		Similar to Q87SF7 SecA protein from Vibrio parahaemolyticus (908 aa). FASTA: opt: 3541 Z-score: 3857.5 E(): 5.7e-207 Smith-Waterman score: 3541; 58.416 identity in 909 aa overlap.
SNP284462	789580	1371304	A	T	R	S	polar, hydrophilic, charged(+)	polar, hydrophilic, neutral	Non-Conservative	Petrosino [12]	FTT0769	preprotein translocase, subunit A, ATPase secretion protein	secA	template	788288	791008		Similar to Q87SF7 SecA protein from Vibrio parahaemolyticus (908 aa). FASTA: opt: 3541 Z-score: 3857.5 E(): 5.7e-207 Smith-Waterman score: 3541; 58.416 identity in 909 aa overlap.
SNP194980	790088	1370796	C	A	R	S	polar, hydrophilic, charged(+)	polar, hydrophilic, neutral	Non-Conservative	Petrosino [12]	FTT0769	preprotein translocase, subunit A, ATPase secretion protein	secA	template	788288	791008		Similar to Q87SF7 SecA protein from Vibrio parahaemolyticus (908 aa). FASTA: opt: 3541 Z-score: 3857.5 E(): 5.7e-207 Smith-Waterman score: 3541; 58.416 identity in 909 aa overlap.
SNP193126	790910	1369974	A	C	K	Q	polar, hydrophilic, charged(+)	polar, hydrophilic, neutral	Non-Conservative	Petrosino [12]	FTT0769	preprotein translocase, subunit A, ATPase secretion protein	secA	template	788288	791008		Similar to Q87SF7 SecA protein from Vibrio parahaemolyticus (908 aa). FASTA: opt: 3541 Z-score: 3857.5 E(): 5.7e-207 Smith-Waterman score: 3541; 58.416 identity in 909 aa overlap.
SNP237005	794637	1366254	G	A	L	F	aliphatic, hydrophobic, neutral	aromatic, hydrophobic, neutral	Non-Conservative	Petrosino [12]	FTT0775c	major facilitator superfamily (MFS) transport protein, pseudogene	bcr2	complement	794437	795339		Similar to Q81IY9 Bicyclomycin resistance protein from Bacillus cereus (strain ATCC 14579 / DSM 31) (416 aa). FASTA: opt: 598 Z-score: 663.2 E(): 4.7e-29 Smith-Waterman score: 598; 28.960 identity in 404 aa overlap. Contains a frameshift after aa 103 Putative drug transport protein.
SNP57932	806842	577865	C	T	V	I	aliphatic, hydrophobic, neutral	aliphatic, hydrophobic, neutral	Conservative	Petrosino [12]	FTT0788c	arabinose phosphate isomerase	kdsD	complement	805895	806878	5.3.1.13	Similar to Q8KLW6 Hypothetical protein from Pseudomonas stutzeri (Pseudomonas perfectomarina) (324 aa). FASTA: opt: 1095 Z-score: 1307.1 E(): 6.5e-65 Smith-Waterman score: 1095; 54.489 identity in 323 aa overlap. Homologs are involved in sialic acid capsule biosynthesis in some pathogenic strains of Escherichia coli.
SNP220877	808697	579720	C	T	A	V	aliphatic, hydrophobic, neutral	aliphatic, hydrophobic, neutral	Conservative	Petrosino [12]	FTT0790	bacterial sugar transferase family protein	N\A	template	807652	809046		Similar to Q9FDJ5 Putative glycosyltransferase from Lactobacillus rhamnosus (466 aa). FASTA: opt: 733 Z-score: 876.0 E(): 6.7e-41 Smith-Waterman score: 733; 33.333 identity in 399 aa overlap. ORF ftt0790
SNP176550	808961	579984	A	G	Q	R	polar, hydrophilic, neutral	polar, hydrophilic, charged(+)	Non-Conservative	Petrosino [12]	FTT0790	bacterial sugar transferase family protein	N\A	template	807652	809046		Similar to Q9FDJ5 Putative glycosyltransferase from Lactobacillus rhamnosus (466 aa). FASTA: opt: 733 Z-score: 876.0 E(): 6.7e-41 Smith-Waterman score: 733; 33.333 identity in 399 aa overlap. ORF ftt0790
SNP10005	809258	580281	T	C	Y	H	aromatic, hydrophobic, polar	aromatic, polar, hydrophilic, charged(+)	Non-Conservative	Petrosino [12]	FTT0791	UDP-glucose 4-epimerase	galE	template	809039	810058	5.1.3.2
SNP360819	813386	584409	A	C	K	Q	polar, hydrophilic, charged(+)	polar, hydrophilic, neutral	Non-Conservative	Petrosino [12]	FTT0794	hypothetical protein	N\A	template	812984	814270		Similar to AAP76675 Phosphoserine phosphatase (EC 3.1.3.3) from Helicobacter hepaticus (199 aa). FASTA: opt: 751 Z-score: 908.2 E(): 1.1e-42 Smith-Waterman score: 751; 55.385 identity in 195 aa overlap (18-212:4-198) AND to AAP76674 Hypothetical protein from Helicobacter hepaticus (213 aa). FASTA: opt: 823 Z-score: 994.3 E(): 1.7e-47 Smith-Waterman score: 823; 57.212 identity in 208 aa overlap (2…
SNP30840	813431	584454	A	G	K	E	polar, hydrophilic, charged(+)	polar, hydrophilic, charged(-)	Non-Conservative	Petrosino [12]	FTT0794	hypothetical protein	N\A	template	812984	814270		Similar to AAP76675 Phosphoserine phosphatase (EC 3.1.3.3) from Helicobacter hepaticus (199 aa). FASTA: opt: 751 Z-score: 908.2 E(): 1.1e-42 Smith-Waterman score: 751; 55.385 identity in 195 aa overlap (18-212:4-198) AND to AAP76674 Hypothetical protein from Helicobacter hepaticus (213 aa). FASTA: opt: 823 Z-score: 994.3 E(): 1.7e-47 Smith-Waterman score: 823; 57.212 identity in 208 aa overlap (2…
SNP326004	813554	584577	G	A	V	I	aliphatic, hydrophobic, neutral	aliphatic, hydrophobic, neutral	Conservative	Petrosino [12]	FTT0794	hypothetical protein	N\A	template	812984	814270		Similar to AAP76675 Phosphoserine phosphatase (EC 3.1.3.3) from Helicobacter hepaticus (199 aa). FASTA: opt: 751 Z-score: 908.2 E(): 1.1e-42 Smith-Waterman score: 751; 55.385 identity in 195 aa overlap (18-212:4-198) AND to AAP76674 Hypothetical protein from Helicobacter hepaticus (213 aa). FASTA: opt: 823 Z-score: 994.3 E(): 1.7e-47 Smith-Waterman score: 823; 57.212 identity in 208 aa overlap (2…
SNP43723	816780	587803	G	T	A	S	aliphatic, hydrophobic, neutral	polar, hydrophilic, neutral	Non-Conservative	Petrosino [12]	FTT0798	glycosyl transferase family protein	N\A	template	816642	817649	2.4.1.-	Similar to O85000 Galactosyl transferase from Streptococcus pneumoniae (323 aa). FASTA: opt: 499 Z-score: 609.1 E(): 4.9e-26 Smith-Waterman score: 499; 34.454 identity in 238 aa overlap. Same homolog as for next upstream ORF. ORF ftt0798
SNP9584	817393	588416	T	A	L	H	aliphatic, hydrophobic, neutral	aromatic, polar, hydrophilic, charged(+)	Non-Conservative	Petrosino [12]	FTT0798	glycosyl transferase family protein	N\A	template	816642	817649	2.4.1.-	Similar to O85000 Galactosyl transferase from Streptococcus pneumoniae (323 aa). FASTA: opt: 499 Z-score: 609.1 E(): 4.9e-26 Smith-Waterman score: 499; 34.454 identity in 238 aa overlap. Same homolog as for next upstream ORF. ORF ftt0798
SNP70214	825517	596540	T	C	I	T	aliphatic, hydrophobic, neutral	polar, hydrophilic, neutral	Non-Conservative	Petrosino [12]	FTT0805	capsule biosynthesis protein capB	capB	template	824838	826055		Similar to CAD71904 Capsule biosynthesis protein CapB from Rhodopirellula baltica (441 aa). FASTA: opt: 1155 Z-score: 1414.5 E(): 6.8e-71 Smith-Waterman score: 1156; 46.763 identity (50.914 ungapped) in 417 aa overlap.
SNP198401	825549	596572	C	A	L	I	aliphatic, hydrophobic, neutral	aliphatic, hydrophobic, neutral	Conservative	Petrosino [12]	FTT0805	capsule biosynthesis protein capB	capB	template	824838	826055		Similar to CAD71904 Capsule biosynthesis protein CapB from Rhodopirellula baltica (441 aa). FASTA: opt: 1155 Z-score: 1414.5 E(): 6.8e-71 Smith-Waterman score: 1156; 46.763 identity (50.914 ungapped) in 417 aa overlap.
SNP167077	848115	1273129	C	T	V	I	aliphatic, hydrophobic, neutral	aliphatic, hydrophobic, neutral	Conservative	Petrosino [12]	FTT0831c	OmpA family protein	N\A	complement	847951	849204		Weakly similar to Q8A8H3 Outer membrane protein,OmpA family from Bacteroides thetaiotaomicron (266 aa). FASTA: opt: 184 Z-score: 220.7 E(): 0.00021 Smith-Waterman score: 184; 29.299 identity in 157 aa overlap. ORF ftt0831c
SNP167793	849165	1272079	T	G	I	L	aliphatic, hydrophobic, neutral	aliphatic, hydrophobic, neutral	Conservative	Petrosino [12]	FTT0831c	OmpA family protein	N\A	complement	847951	849204		Weakly similar to Q8A8H3 Outer membrane protein,OmpA family from Bacteroides thetaiotaomicron (266 aa). FASTA: opt: 184 Z-score: 220.7 E(): 0.00021 Smith-Waterman score: 184; 29.299 identity in 157 aa overlap. ORF ftt0831c
SNP43091	899496	1221912	C	T	T	M	polar, hydrophilic, neutral	hydrophobic, neutral	Non-Conservative	Petrosino [12]	FTT0891	conserved hypothetical membrane protein	N\A	template	899390	900109		Similar to Q98NS1 Hypothetical protein mlr0012 from Rhizobium loti (244 aa). FASTA: opt: 327 Z-score: 404.4 bits: 82.2 E(): 1.2e-14 Smith-Waterman score: 327; 32.308 identity in 195 aa overlap. ORF ftt0891
SNP12551	938703	799547	A	G	I	V	aliphatic, hydrophobic, neutral	aliphatic, hydrophobic, neutral	Conservative	Petrosino [12]	FTT0927	Glutamate-1-semialdehyde-2,1-aminomutase	hemL	template	938085	939380	5.4.3.8	Similar to AAO91373 Glutamate-1-semialdehyde-2,1-aminomutase from Coxiella burnetii (435 aa). FASTA: opt: 1711 Z-score: 1960.9 E(): 2.2e-101 Smith-Waterman score: 1711; 60.520identity in 423 aa overlap.
SNP23775	939056	799900	C	A	F	L	aromatic, hydrophobic, neutral	aliphatic, hydrophobic, neutral	Non-Conservative	Petrosino [12]	FTT0927	Glutamate-1-semialdehyde-2,1-aminomutase	hemL	template	938085	939380	5.4.3.8	Similar to AAO91373 Glutamate-1-semialdehyde-2,1-aminomutase from Coxiella burnetii (435 aa). FASTA: opt: 1711 Z-score: 1960.9 E(): 2.2e-101 Smith-Waterman score: 1711; 60.520identity in 423 aa overlap.
SNP101973	939349	800193	A	G	Y	C	aromatic, hydrophobic, polar	polar, hydrophobic, neutral	Non-Conservative	Petrosino [12]	FTT0927	Glutamate-1-semialdehyde-2,1-aminomutase	hemL	template	938085	939380	5.4.3.8	Similar to AAO91373 Glutamate-1-semialdehyde-2,1-aminomutase from Coxiella burnetii (435 aa). FASTA: opt: 1711 Z-score: 1960.9 E(): 2.2e-101 Smith-Waterman score: 1711; 60.520identity in 423 aa overlap.
SNP353304	975592	836431	T	C	I	M	aliphatic, hydrophobic, neutral	hydrophobic, neutral	Non-Conservative	Petrosino [12]	FTT0964c	signal recognition particle protein, Ffh	ffh	complement	975475	976851		Similar to Q9CLN6 Ffh from Pasteurella multocida (458 aa). FASTA: opt: 1851 Z-score: 1789.9 E(): 7.5e-92 Smith-Waterman score: 1851; 61.790 identity in 458 aa overlap
SNP272400	976371	837210	T	C	K	E	polar, hydrophilic, charged(+)	polar, hydrophilic, charged(-)	Non-Conservative	Petrosino [12]	FTT0964c	signal recognition particle protein, Ffh	ffh	complement	975475	976851		Similar to Q9CLN6 Ffh from Pasteurella multocida (458 aa). FASTA: opt: 1851 Z-score: 1789.9 E(): 7.5e-92 Smith-Waterman score: 1851; 61.790 identity in 458 aa overlap
SNP190116	976465	837304	A	C	N	K	polar, hydrophilic, neutral	polar, hydrophilic, charged(+)	Non-Conservative	Petrosino [12]	FTT0964c	signal recognition particle protein, Ffh	ffh	complement	975475	976851		Similar to Q9CLN6 Ffh from Pasteurella multocida (458 aa). FASTA: opt: 1851 Z-score: 1789.9 E(): 7.5e-92 Smith-Waterman score: 1851; 61.790 identity in 458 aa overlap
SNP82291	1012635	874239	T	G	I	S	aliphatic, hydrophobic, neutral	polar, hydrophilic, neutral	Non-Conservative	Petrosino [12]	FTT1001	Regulatory protein	N\A	template	1012247	1012678		Similar to Q8ZJ15 Putative regulatory protein from Yersinia pestis (169 aa). FASTA: opt: 313 Z-score: 406.8 E(): 9.2e-15 Smith-Waterman score: 313; 36.429 identity in 140 aa overlap. ORF ftt1001
SNP37625	1016262	877866	G	A	T	I	polar, hydrophilic, neutral	aliphatic, hydrophobic, neutral	Non-Conservative	Petrosino [12]	FTT1004c	conserved hypothetical membrane protein	N\A	complement	1016213	1017106		Similar to Q9RX03 Hypothetical protein DR0512 from Deinococcus radiodurans (301 aa). Similar to opt: 577 Z-score: 644.6 E(): 5.1e-28 Smith-Waterman score: 577; 33.094 identity in 278 aa overlap. ORF ftt1004c
SNP259383	1016441	878045	C	T	M	I	hydrophobic, neutral	aliphatic, hydrophobic, neutral	Non-Conservative	Petrosino [12]	FTT1004c	conserved hypothetical membrane protein	N\A	complement	1016213	1017106		Similar to Q9RX03 Hypothetical protein DR0512 from Deinococcus radiodurans (301 aa). Similar to opt: 577 Z-score: 644.6 E(): 5.1e-28 Smith-Waterman score: 577; 33.094 identity in 278 aa overlap. ORF ftt1004c
SNP58729	1016478	878082	A	G	I	T	aliphatic, hydrophobic, neutral	polar, hydrophilic, neutral	Non-Conservative	Petrosino [12]	FTT1004c	conserved hypothetical membrane protein	N\A	complement	1016213	1017106		Similar to Q9RX03 Hypothetical protein DR0512 from Deinococcus radiodurans (301 aa). Similar to opt: 577 Z-score: 644.6 E(): 5.1e-28 Smith-Waterman score: 577; 33.094 identity in 278 aa overlap. ORF ftt1004c
SNP260265	1051762	913370	C	T	S	L	polar, hydrophilic, neutral	aliphatic, hydrophobic, neutral	Non-Conservative	Petrosino [12]	FTT1039	D-alanyl-D-alanine carboxypeptidase (Penicillin binding protein) family protein	dacB	template	1050993	1052396	3.4.16.4	Similar to Q83FD1 D-alanyl-D-alanine carboxypeptidase/D-alanyl-D-alanine-endopeptidase from Coxiella burnetii (477 aa). FASTA: opt: 654 Z-score: 780.3 E(): 1.4e-35 Smith-Waterman score: 654; 29.436 identity in 479 aa overlap.
SNP141496	1052319	913927	A	G	N	D	polar, hydrophilic, neutral	polar, hydrophilic, charged(-)	Non-Conservative	Petrosino [12]	FTT1039	D-alanyl-D-alanine carboxypeptidase (Penicillin binding protein) family protein	dacB	template	1050993	1052396	3.4.16.4	Similar to Q83FD1 D-alanyl-D-alanine carboxypeptidase/D-alanyl-D-alanine-endopeptidase from Coxiella burnetii (477 aa). FASTA: opt: 654 Z-score: 780.3 E(): 1.4e-35 Smith-Waterman score: 654; 29.436 identity in 479 aa overlap.
SNP281132	1054747	916354	T	G	N	K	polar, hydrophilic, neutral	polar, hydrophilic, charged(+)	Non-Conservative	Petrosino [12]	FTT1043	FKBP-type peptidyl-prolyl cis-trans isomerase family protein	N\A	template	1054250	1055062	5.2.1.8	Similar to O32766 Macrophage infectivity potentiator from Legionella hackeliae (249 aa). FASTA: opt: 235 Z-score: 273.3 E(): 2.5e-07 Smith-Waterman score: 343; 27.599 identity in 279 aa overlap. ORF ftt1043
SNP77031	1067293	928899	T	C	I	M	aliphatic, hydrophobic, neutral	hydrophobic, neutral	Non-Conservative	Petrosino [12]	FTT1058c	Radical SAM superfamily protein	N\A	complement	1066984	1068096		Similar to Y2A6_PSEAE (Q51385) Hypothetical protein PA3806 from Pseudomonas aeruginosa (379 aa). FASTA: opt: 1458 Z-score: 1752.5 E(): 1e-89 Smith-Waterman score: 1458; 60.434 identity in 369 aa overlap. ORF ftt1058c
SNP187134	1067801	929407	G	T	A	E	aliphatic, hydrophobic, neutral	polar, hydrophilic, charged(-)	Non-Conservative	Petrosino [12]	FTT1058c	Radical SAM superfamily protein	N\A	complement	1066984	1068096		Similar to Y2A6_PSEAE (Q51385) Hypothetical protein PA3806 from Pseudomonas aeruginosa (379 aa). FASTA: opt: 1458 Z-score: 1752.5 E(): 1e-89 Smith-Waterman score: 1458; 60.434 identity in 369 aa overlap. ORF ftt1058c
SNP262145	1087319	1295110	G	A	W	*	aromatic, hydrophobic, neutral		Stop	Petrosino [12]	FTT1075	transcriptional regulator	N\A	template	1087105	1087332		Similar to Y4MF_RHISN (P55565) Hypothetical transcriptional regulator y4mF from Rhizobium sp. (strain NGR234) (76 aa). FASTA: opt: 205 Z-score: 292.4 E(): 2.1e-08 Smith-Waterman score: 205; 47.059identity in 68 aa overlap. ORF ftt1075
SNP262145	1087319	1295110	G	A	W	*	aromatic, hydrophobic, neutral		Stop	Petrosino [12]	FTT1076	transcription regulator	hipA	template	1087317	1088591		Similar to Q82V03 Possible HipA protein from Nitrosomonas europaea (429 aa). FASTA: opt: 1021 Z-score: 1249.8 E(): 1e-61 Smith-Waterman score: 1021; 41.162 identity in 413 aa overlap.
SNP26053	1091209	1298983	A	G	F	S	aromatic, hydrophobic, neutral	polar, hydrophilic, neutral	Non-Conservative	Petrosino [12]	FTT1081c	hypothetical protein	N\A	complement	1091064	1091867		ORF ftt1081c
SNP200733	1093554	1301328	G	A	P	S	hydrophobic, neutral	polar, hydrophilic, neutral	Non-Conservative	Petrosino [12]	FTT1084c	recombination associated protein	rdgC	complement	1092793	1093653		Similar to RDGC_YERPE (Q8ZC18) Recombination associated protein rdgC from Yersinia pestis (303 aa). FASTA: opt: 448 Z-score: 546.2 E(): 1.6e-22 Smith-Waterman score: 448; 28.231 identity in 294 aa overlap.
SNP326052	1105316	1313090	G	A	T	M	polar, hydrophilic, neutral	hydrophobic, neutral	Non-Conservative	Petrosino [12]	FTT1095c	hypothetical protein	N\A	complement	1104028	1105410		Similar to Q88DA4 Outer membrane efflux protein from Pseudomonas putida (strain KT2440) (477 aa). FASTA: opt: 405 Z-score: 484.1 E(): 4.5e-19 Smith-Waterman score: 405; 22.907 identity in 454 aa overlap. Not a membrane protein. ORF ftt1095c
SNP21623	1111880	1319655	A	G	D	G	polar, hydrophilic, charged(-)	aliphatic, neutral	Non-Conservative	Petrosino [12]	FTT1101	4Fe-4S ferredoxin (electron transport) family protein, pseudogene	yjeS	template	1111837	1112007		Similar to YJES_ECOLI (P39288) Putative electron transport protein from Escherichia coli (379 aa). FASTA: opt: 611 Z-score: 746.8 E(): 1e-33 Smith-Waterman score: 999; 45.938 identity in 357 aa overlap. Contains 2 frameshifts after aa 119 and 176. Both frameshifts occur at heptanucleotide sequences and so could be part of a programmed translational frameshifts
SNP363439	1111949	1319724	A	G	E	G	polar, hydrophilic, charged(-)	aliphatic, neutral	Non-Conservative	Petrosino [12]	FTT1101	4Fe-4S ferredoxin (electron transport) family protein, pseudogene	yjeS	template	1111837	1112007		Similar to YJES_ECOLI (P39288) Putative electron transport protein from Escherichia coli (379 aa). FASTA: opt: 611 Z-score: 746.8 E(): 1e-33 Smith-Waterman score: 999; 45.938 identity in 357 aa overlap. Contains 2 frameshifts after aa 119 and 176. Both frameshifts occur at heptanucleotide sequences and so could be part of a programmed translational frameshifts
SNP180636	1112523	1320298	T	G	*	E		polar, hydrophilic, charged(-)	UnStop	Petrosino [12]	FTT1101	4Fe-4S ferredoxin (electron transport) family protein, pseudogene	yjeS	template	1112007	1112525		Similar to YJES_ECOLI (P39288) Putative electron transport protein from Escherichia coli (379 aa). FASTA: opt: 611 Z-score: 746.8 E(): 1e-33 Smith-Waterman score: 999; 45.938 identity in 357 aa overlap. Contains 2 frameshifts after aa 119 and 176. Both frameshifts occur at heptanucleotide sequences and so could be part of a programmed translational frameshifts
SNP210354	1113058	1320835	T	C	L	S	aliphatic, hydrophobic, neutral	polar, hydrophilic, neutral	Non-Conservative	Petrosino [12]	FTT1103	conserved hypothetical lipoprotein	N\A	template	1112964	1114061		Similar to Q8Z9P6 Putative exported protein from Salmonella typhi (281 aa). FASTA: opt: 392 Z-score: 435.6 E(): 2.3e-16 Smith-Waterman score: 392; 33.491 identity in 212 aa overlap. ORF ftt1103
SNP202770	1113073	1320850	G	A	S	N	polar, hydrophilic, neutral	polar, hydrophilic, neutral	Conservative	Petrosino [12]	FTT1103	conserved hypothetical lipoprotein	N\A	template	1112964	1114061		Similar to Q8Z9P6 Putative exported protein from Salmonella typhi (281 aa). FASTA: opt: 392 Z-score: 435.6 E(): 2.3e-16 Smith-Waterman score: 392; 33.491 identity in 212 aa overlap. ORF ftt1103
SNP47407	1113151	1320928	T	C	I	T	aliphatic, hydrophobic, neutral	polar, hydrophilic, neutral	Non-Conservative	Petrosino [12]	FTT1103	conserved hypothetical lipoprotein	N\A	template	1112964	1114061		Similar to Q8Z9P6 Putative exported protein from Salmonella typhi (281 aa). FASTA: opt: 392 Z-score: 435.6 E(): 2.3e-16 Smith-Waterman score: 392; 33.491 identity in 212 aa overlap. ORF ftt1103
SNP331549	1114438	1322231	A	C	T	P	polar, hydrophilic, neutral	hydrophobic, neutral	Non-Conservative	Petrosino [12]	FTT1104	major facilitator superfamily (MFS) transport protein, pseudogene	bcr1	template	1114348	1114602		Similar to Q9CKS3 Bcr from Pasteurella multocida (399 aa). FASTA: opt: 568 Z-score: 616.5 E(): 1.9e-26 Smith-Waterman score: 568; 30.518 identity in 367 aa overlap. Contains a frameshift after aa 85 Putative drug transport protein.
SNP258831	1124777	1085716	C	T	G	S	aliphatic, neutral	polar, hydrophilic, neutral	Non-Conservative	Petrosino [12]	FTT1115c	preprotein translocase, subunit D, membrane protein	secD	complement	1124736	1126673		Similar to Q8ECM5 Protein-export membrane protein SecD from Shewanella oneidensis (616 aa). FASTA: opt: 1254 Z-score: 1367.1 E(): 3e-68 Smith-Waterman score: 1583; 40.683 identity in 644 aa overlap. Promotes in cooperation with SecF the release of the mature peptide into the periplasm.
SNP261293	1125641	1086580	T	C	I	V	aliphatic, hydrophobic, neutral	aliphatic, hydrophobic, neutral	Conservative	Petrosino [12]	FTT1115c	preprotein translocase, subunit D, membrane protein	secD	complement	1124736	1126673		Similar to Q8ECM5 Protein-export membrane protein SecD from Shewanella oneidensis (616 aa). FASTA: opt: 1254 Z-score: 1367.1 E(): 3e-68 Smith-Waterman score: 1583; 40.683 identity in 644 aa overlap. Promotes in cooperation with SecF the release of the mature peptide into the periplasm.
SNP210706	1125743	1086682	G	T	P	T	hydrophobic, neutral	polar, hydrophilic, neutral	Non-Conservative	Petrosino [12]	FTT1115c	preprotein translocase, subunit D, membrane protein	secD	complement	1124736	1126673		Similar to Q8ECM5 Protein-export membrane protein SecD from Shewanella oneidensis (616 aa). FASTA: opt: 1254 Z-score: 1367.1 E(): 3e-68 Smith-Waterman score: 1583; 40.683 identity in 644 aa overlap. Promotes in cooperation with SecF the release of the mature peptide into the periplasm.
SNP288793	1126201	1087140	G	T	S	Y	polar, hydrophilic, neutral	aromatic, hydrophobic, polar	Non-Conservative	Petrosino [12]	FTT1115c	preprotein translocase, subunit D, membrane protein	secD	complement	1124736	1126673		Similar to Q8ECM5 Protein-export membrane protein SecD from Shewanella oneidensis (616 aa). FASTA: opt: 1254 Z-score: 1367.1 E(): 3e-68 Smith-Waterman score: 1583; 40.683 identity in 644 aa overlap. Promotes in cooperation with SecF the release of the mature peptide into the periplasm.
SNP6168	1150248	1111197	T	A	C	S	polar, hydrophobic, neutral	polar, hydrophilic, neutral	Non-Conservative	Petrosino [12]	FTT1138	Ferrochelatase	hemH	template	1150233	1151234	4.99.1.1	Similar to HEMZ_RHIME (Q92M52) Ferrochelatase (EC 4.99.1.1) from Rhizobium meliloti (Sinorhizobium meliloti) (339 aa). FASTA: opt: 1069 Z-score: 1243.4 E(): 2.3e-61 Smith-Waterman score: 1069; 48.160 identity in 326 aa overlap.
SNP154814	1151025	1111974	A	G	T	A	polar, hydrophilic, neutral	aliphatic, hydrophobic, neutral	Non-Conservative	Petrosino [12]	FTT1138	Ferrochelatase	hemH	template	1150233	1151234	4.99.1.1	Similar to HEMZ_RHIME (Q92M52) Ferrochelatase (EC 4.99.1.1) from Rhizobium meliloti (Sinorhizobium meliloti) (339 aa). FASTA: opt: 1069 Z-score: 1243.4 E(): 2.3e-61 Smith-Waterman score: 1069; 48.160 identity in 326 aa overlap.
SNP218164	1195849	1156786	T	G	N	K	polar, hydrophilic, neutral	polar, hydrophilic, charged(+)	Non-Conservative	Petrosino [12]	FTT1179	GTP binding translational elongation factor Tu and G family protein	bipA	template	1194341	1196158		Similar to Q9KNJ4 GTP-binding protein TypA from Vibrio cholerae (609 aa). FASTA: opt: 2972 Z-score: 3319.9 E(): 5e-177 Smith-Waterman score: 2972; 73.045identity in 601 aa overlap.
SNP187528	1195928	1156865	A	G	N	D	polar, hydrophilic, neutral	polar, hydrophilic, charged(-)	Non-Conservative	Petrosino [12]	FTT1179	GTP binding translational elongation factor Tu and G family protein	bipA	template	1194341	1196158		Similar to Q9KNJ4 GTP-binding protein TypA from Vibrio cholerae (609 aa). FASTA: opt: 2972 Z-score: 3319.9 E(): 5e-177 Smith-Waterman score: 2972; 73.045identity in 601 aa overlap.
SNP73062	1196126	1157063	A	G	N	D	polar, hydrophilic, neutral	polar, hydrophilic, charged(-)	Non-Conservative	Petrosino [12]	FTT1179	GTP binding translational elongation factor Tu and G family protein	bipA	template	1194341	1196158		Similar to Q9KNJ4 GTP-binding protein TypA from Vibrio cholerae (609 aa). FASTA: opt: 2972 Z-score: 3319.9 E(): 5e-177 Smith-Waterman score: 2972; 73.045identity in 601 aa overlap.
SNP280858	1199562	1160497	C	T	S	N	polar, hydrophilic, neutral	polar, hydrophilic, neutral	Conservative	Petrosino [12]	FTT1182c	VacJ lipoprotein, pseudogene	vacJ	complement	1199393	1199881		Similar to Q9Z674 Lipoprotein from Zymomonas mobilis (256 aa). FASTA: opt: 348 Z-score: 428.0 E(): 6e-16 Smith-Waterman score: 348; 33.333 identity in 234 aa overlap. Contains an in-frame stop codon
SNP163396	1247085	698114	T	C	I	T	aliphatic, hydrophobic, neutral	polar, hydrophilic, neutral	Non-Conservative	Petrosino [12]	FTT1228	prolipoprotein diacylglyceryl transferase	lgt	template	1246307	1247113	2.4.99.-	Similar to Q9I6F2 Prolipoprotein diacylglyceryl transferase from Pseudomonas aeruginosa (266 aa). FASTA: opt: 1070 Z-score: 1270.0 E(): 7.6e-63 Smith-Waterman score: 1070; 56.757 identity in 259 aa overlap.
SNP225566	1247102	698097	A	G	K	E	polar, hydrophilic, charged(+)	polar, hydrophilic, charged(-)	Non-Conservative	Petrosino [12]	FTT1228	prolipoprotein diacylglyceryl transferase	lgt	template	1246307	1247113	2.4.99.-	Similar to Q9I6F2 Prolipoprotein diacylglyceryl transferase from Pseudomonas aeruginosa (266 aa). FASTA: opt: 1070 Z-score: 1270.0 E(): 7.6e-63 Smith-Waterman score: 1070; 56.757 identity in 259 aa overlap.
SNP229135	1254756	690636	G	A	P	S	hydrophobic, neutral	polar, hydrophilic, neutral	Non-Conservative	Petrosino [12]	FTT1235c	glycosyl transferases group 1 family protein	lpcC	complement	1254094	1255158	2.-.-.-	Similar to Q8FZH8 Lipopolysaccharide core biosynthesis mannosyltransferase LpcC from Brucella suis (354 aa). FASTA: opt: 825 Z-score: 1005.6 E(): 4e-48 Smith-Waterman score: 825; 38.352 identity in 352 aa overlap.
SNP332581	1270637	674756	A	G	I	V	aliphatic, hydrophobic, neutral	aliphatic, hydrophobic, neutral	Conservative	Petrosino [12]	FTT1249	mycobacterial cell entry (mce) related family protein	N\A	template	1270088	1270813		Similar to Q9HZ27 Hypothetical protein PA3213 from Pseudomonas aeruginosa (312 aa). FASTA: opt: 282 Z-score: 315.9 E(): 1.1e-09 Smith-Waterman score: 282; 23.661 identity in 224 aa overlap. The archetype (Rv0169) for mce related family proteins, was isolated as being necessary for colonization of, and survival within, the macrophage MEDLINE:93377076. ORF ftt1249
SNP23753	1279744	665649	A	G	E	G	polar, hydrophilic, charged(-)	aliphatic, neutral	Non-Conservative	Petrosino [12]	FTT1257	HlyD family secretion protein	emrA1	template	1279038	1280060		Similar to Q83DE0 Multidrug resistance protein from Coxiella burnetii (331 aa). FASTA: opt: 742 Z-score: 834.3 E(): 1.4e-38 Smith-Waterman score: 742; 37.695 identity in 321 aa overlap.
SNP94943	1288854	569185	G	A	E	K	polar, hydrophilic, charged(-)	polar, hydrophilic, charged(+)	Non-Conservative	Petrosino [12]	FTT1267	LysR transcriptional regulator family protein	N\A	template	1288617	1289513		Similar to Q8E7Z8 Transcriptional regulator, LysR family from Shewanella oneidensis (289 aa). FASTA: opt: 561 Z-score: 683.5 E(): 3.5e-30 Smith-Waterman score: 561; 32.423identity in 293 aa overlap. ORF ftt1267
SNP191021	1289094	568945	T	C	S	P	polar, hydrophilic, neutral	hydrophobic, neutral	Non-Conservative	Petrosino [12]	FTT1267	LysR transcriptional regulator family protein	N\A	template	1288617	1289513		Similar to Q8E7Z8 Transcriptional regulator, LysR family from Shewanella oneidensis (289 aa). FASTA: opt: 561 Z-score: 683.5 E(): 3.5e-30 Smith-Waterman score: 561; 32.423identity in 293 aa overlap. ORF ftt1267
SNP166031	1289499	568540	A	C	K	Q	polar, hydrophilic, charged(+)	polar, hydrophilic, neutral	Non-Conservative	Petrosino [12]	FTT1267	LysR transcriptional regulator family protein	N\A	template	1288617	1289513		Similar to Q8E7Z8 Transcriptional regulator, LysR family from Shewanella oneidensis (289 aa). FASTA: opt: 561 Z-score: 683.5 E(): 3.5e-30 Smith-Waterman score: 561; 32.423identity in 293 aa overlap. ORF ftt1267
SNP139190	1289832	568207	G	T	L	I	aliphatic, hydrophobic, neutral	aliphatic, hydrophobic, neutral	Conservative	Petrosino [12]	FTT1268c	Chaperone protein dnaJ (heat shock protein 70 family cofactor)	dnaJ	complement	1289527	1290651		Similar to DNAJ_FRATU (P48207) Chaperone protein dnaJ from Francisella tularensis ssp. holarctica strain LVS (371 aa). FASTA: opt: 2489 Z-score: 2932.9 E(): 1.8e-155 Smith-Waterman score: 2489; 98.663 identity in 374 aa overlap.
SNP136906	1290907	567141	A	C	S	A	polar, hydrophilic, neutral	aliphatic, hydrophobic, neutral	Non-Conservative	Petrosino [12]	FTT1269c	Chaperone protein dnaK (heat shock protein family 70 protein)	dnaK	complement	1290740	1292668		Similar to DNAK_FRATU (P48205) Chaperone protein dnaK (Heat shock protein 70) from Francisella tularensis ssp. holarctica strain LVS (642 aa). FASTA: opt: 4023 Z-score: 4265.8 E(): 0 Smith-Waterman score: 4023; 99.221 identity in 642 aa overlap.
SNP153336	1291516	566532	C	A	A	S	aliphatic, hydrophobic, neutral	polar, hydrophilic, neutral	Non-Conservative	Petrosino [12]	FTT1269c	Chaperone protein dnaK (heat shock protein family 70 protein)	dnaK	complement	1290740	1292668		Similar to DNAK_FRATU (P48205) Chaperone protein dnaK (Heat shock protein 70) from Francisella tularensis ssp. holarctica strain LVS (642 aa). FASTA: opt: 4023 Z-score: 4265.8 E(): 0 Smith-Waterman score: 4023; 99.221 identity in 642 aa overlap.
SNP183813	1335468	1378607	A	G	H	R	aromatic, polar, hydrophilic, charged(+)	polar, hydrophilic, charged(+)	Non-Conservative	Petrosino [12]	FTT1311	major facilitator superfamily (MFS) transport protein	yieO	template	1335104	1336510		Similar to Q8UHQ9 MFS permease from Agrobacterium tumefaciens (strain C58 / ATCC 33970) (475 aa). FASTA: opt: 757 Z-score: 760.1 E(): 1.9e-34 Smith-Waterman score: 766; 32.735 identity in 446 aa overlap.
SNP280340	1335771	1378910	G	A	R	H	polar, hydrophilic, charged(+)	aromatic, polar, hydrophilic, charged(+)	Non-Conservative	Petrosino [12]	FTT1311	major facilitator superfamily (MFS) transport protein	yieO	template	1335104	1336510		Similar to Q8UHQ9 MFS permease from Agrobacterium tumefaciens (strain C58 / ATCC 33970) (475 aa). FASTA: opt: 757 Z-score: 760.1 E(): 1.9e-34 Smith-Waterman score: 766; 32.735 identity in 446 aa overlap.
SNP296787	1335846	1378985	A	G	H	R	aromatic, polar, hydrophilic, charged(+)	polar, hydrophilic, charged(+)	Non-Conservative	Petrosino [12]	FTT1311	major facilitator superfamily (MFS) transport protein	yieO	template	1335104	1336510		Similar to Q8UHQ9 MFS permease from Agrobacterium tumefaciens (strain C58 / ATCC 33970) (475 aa). FASTA: opt: 757 Z-score: 760.1 E(): 1.9e-34 Smith-Waterman score: 766; 32.735 identity in 446 aa overlap.
SNP232951	1348311	1391450	T	G	D	E	polar, hydrophilic, charged(-)	polar, hydrophilic, charged(-)	Conservative	Petrosino [12]	FTT1321	Peptidase M16 family protein	N\A	template	1348123	1349376	3.4.-.-	Similar to Q83AI4 Peptidase, M16 family from Coxiella burnetii (459 aa). FASTA: opt: 868 Z-score: 1053.1 E(): 9.1e-51 Smith-Waterman score: 868; 34.158 identity in 404 aa overlap. ORF ftt1321
SNP357616	1349452	1392591	A	G	N	D	polar, hydrophilic, neutral	polar, hydrophilic, charged(-)	Non-Conservative	Petrosino [12]	FTT1322	Peptidase M16 family protein	N\A	template	1349383	1350606	3.4.-.-	Similar to Q83AI5 Peptidase, M16 family from Coxiella burnetii (443 aa). FASTA: opt: 605 Z-score: 727.1 E(): 1.3e-32 Smith-Waterman score: 605; 28.607 identity in 402 aa overlap. ORF ftt1322
SNP79504	1349525	1392664	A	G	D	G	polar, hydrophilic, charged(-)	aliphatic, neutral	Non-Conservative	Petrosino [12]	FTT1322	Peptidase M16 family protein	N\A	template	1349383	1350606	3.4.-.-	Similar to Q83AI5 Peptidase, M16 family from Coxiella burnetii (443 aa). FASTA: opt: 605 Z-score: 727.1 E(): 1.3e-32 Smith-Waterman score: 605; 28.607 identity in 402 aa overlap. ORF ftt1322
SNP171361	1350440	1393579	T	C	F	S	aromatic, hydrophobic, neutral	polar, hydrophilic, neutral	Non-Conservative	Petrosino [12]	FTT1322	Peptidase M16 family protein	N\A	template	1349383	1350606	3.4.-.-	Similar to Q83AI5 Peptidase, M16 family from Coxiella burnetii (443 aa). FASTA: opt: 605 Z-score: 727.1 E(): 1.3e-32 Smith-Waterman score: 605; 28.607 identity in 402 aa overlap. ORF ftt1322
SNP114728	1361977	1405115	A	G	I	V	aliphatic, hydrophobic, neutral	aliphatic, hydrophobic, neutral	Conservative	Petrosino [12]	FTT1332	polysaccharide biosynthesis protein (export protein)	N\A	template	1361242	1362501		Similar to Q9X4C7 Repeat unit exporter from Escherichia coli (419 aa). FASTA: opt: 324 Z-score: 369.2 E(): 1.1e-12 Smith-Waterman score: 324; 22.604 identity in 407 aa overlap. ORF ftt1332
SNP175720	1406799	518365	A	C	Y	S	aromatic, hydrophobic, polar	polar, hydrophilic, neutral	Non-Conservative	Petrosino [12]	FTT1362	major facilitator superfamily (MFS) transport protein, pseudogene	N\A	template	1406603	1407331		Similar to AAO90848 (Q83BZ2) Major facilitator family transporter from Coxiella burnetii (429 aa). FASTA: opt: 816 Z-score: 918.3 E(): 2.7e-43 Smith-Waterman score: 1063; 41.966 identity in 417 aa overlap. CDS contains a frameshift after aa 49 and is also interrupted by an IS element Identical to FTT1717 upto aa 307. It is part of the duplicated region 1374371..1408281 (again upto aa 307) which i…
SNP306776	1408394	516786	A	C	Q	P	polar, hydrophilic, neutral	hydrophobic, neutral	Non-Conservative	Petrosino [12]	FTT1362	major facilitator superfamily (MFS) transport protein, pseudogene	N\A	template	1408282	1408617		Similar to AAO90848 (Q83BZ2) Major facilitator family transporter from Coxiella burnetii (429 aa). FASTA: opt: 816 Z-score: 918.3 E(): 2.7e-43 Smith-Waterman score: 1063; 41.966 identity in 417 aa overlap. CDS contains a frameshift after aa 49 and is also interrupted by an IS element Identical to FTT1717 upto aa 307. It is part of the duplicated region 1374371..1408281 (again upto aa 307) which i…
SNP282935	1486894	436849	G	A	S	L	polar, hydrophilic, neutral	aliphatic, hydrophobic, neutral	Non-Conservative	Petrosino [12]	FTT1440c	major facilitator superfamily (MFS) transport protein, pseudogene	N\A	complement	1486125	1487384		Similar to Q8XAW5 Putative transport protein from E.coli (475 aa). FASTA: opt: 517 Z-score: 580.9 E(): 1.7e-24 Smith-Waterman score: 517; 27.007 identity in 411 aa overlap . Contains a frameshift after aa 45 ORF ftt1440c
SNP144871	1487310	437265	T	C	I	M	aliphatic, hydrophobic, neutral	hydrophobic, neutral	Non-Conservative	Petrosino [12]	FTT1440c	major facilitator superfamily (MFS) transport protein, pseudogene	N\A	complement	1486125	1487384		Similar to Q8XAW5 Putative transport protein from E.coli (475 aa). FASTA: opt: 517 Z-score: 580.9 E(): 1.7e-24 Smith-Waterman score: 517; 27.007 identity in 411 aa overlap . Contains a frameshift after aa 45 ORF ftt1440c
SNP5397	1492629	442585	G	A	D	N	polar, hydrophilic, charged(-)	polar, hydrophilic, neutral	Non-Conservative	Petrosino [12]	FTT1445	Thioredoxin	trxA1	template	1492446	1492769		Similar to Q9JYY9 Thioredoxin from Neisseria meningitidis (110 aa). FASTA: opt: 452 Z-score: 595.9 E(): 2.4e-25 Smith-Waterman score: 452; 62.000 identity in 100 aa overlap
SNP187834	1499550	425108	A	C	S	A	polar, hydrophilic, neutral	aliphatic, hydrophobic, neutral	Non-Conservative	Petrosino [12]	FTT1450c	dTDP-D-glucose 4,6-dehydratase	wbtM	complement	1499074	1500120	4.2.1.46	Similar to Q9RDY1 RmlB protein from Legionella pneumophila (351 aa). FASTA: opt: 1490 Z-score: 1729.8 E(): 1.7e-88 Smith-Waterman score: 1490; 64.392 identity in 337 aa overlap
SNP223360	1499853	424805	G	T	L	M	aliphatic, hydrophobic, neutral	hydrophobic, neutral	Non-Conservative	Petrosino [12]	FTT1450c	dTDP-D-glucose 4,6-dehydratase	wbtM	complement	1499074	1500120	4.2.1.46	Similar to Q9RDY1 RmlB protein from Legionella pneumophila (351 aa). FASTA: opt: 1490 Z-score: 1729.8 E(): 1.7e-88 Smith-Waterman score: 1490; 64.392 identity in 337 aa overlap
SNP339664	1500645	424012	C	T	G	S	aliphatic, neutral	polar, hydrophilic, neutral	Non-Conservative	Petrosino [12]	FTT1451c	Glucose-1-phosphate thymidylyltransferase	wbtL	complement	1500637	1501521	2.7.7.24	Similar to O66250 Glucose-1-phosphate-thymidylyltransferase from Actinobacillus actinomycetemcomitans (290 aa). FASTA: opt: 1336 Z-score: 1567.4 E(): 1.9e-79 Smith-Waterman score: 1336; 67.466 identity in 292 aa overlap
SNP247527	1503079	421578	T	C	S	G	polar, hydrophilic, neutral	aliphatic, neutral	Non-Conservative	Petrosino [12]	FTT1453c	O-antigen flippase	wzx	complement	1502399	1503886		Similar to AAO39697(Q84DG4) O antigen flippase from E. coli (464 aa). FASTA: opt: 861 Z-score: 954.5 E(): 2.6e-45 Smith-Waterman score: 861; 31.343identity in 469 aa overlap
SNP136591	1508569	416088	T	C	I	V	aliphatic, hydrophobic, neutral	aliphatic, hydrophobic, neutral	Conservative	Petrosino [12]	FTT1457c	glycosyl transferase	wbtG	complement	1507574	1508674	2.4.1.-	Similar to Q8ECG6 Glycosyl transferase group 1 family protein from Shewanella oneidensis (373 aa). FASTA: opt: 531 Z-score: 625.5 E(): 5.5e-27 Smith-Waterman score: 531; 32.353 identity in 374 aa overlap
SNP17185	1508831	415826	A	G	F	S	aromatic, hydrophobic, neutral	polar, hydrophilic, neutral	Non-Conservative	Petrosino [12]	FTT1458c	Membrane protein/O-antigen protein	wzy	complement	1508671	1509900		membrane protein/O-antigen polymerase (personal communication from authors)
SNP362119	1510558	414099	C	T	A	T	aliphatic, hydrophobic, neutral	polar, hydrophilic, neutral	Non-Conservative	Petrosino [12]	FTT1459c	NAD dependent epimerase	wbtF	complement	1509917	1510888	5.1.3.2	Similar to Q8KN66 WbpP from Pseudomonas aeruginosa (341 aa). FASTA: opt: 1033 Z-score: 1225.7 E(): 2e-60 Smith-Waterman score: 1033; 51.562identity in 320 aa overlap
SNP165761	1511313	413344	T	C	S	G	polar, hydrophilic, neutral	aliphatic, neutral	Non-Conservative	Petrosino [12]	FTT1460c	UDP-glucose/GDP-mannose dehydrogenase	wbtE	complement	1510888	1512198	1.1.1.-	Similar to Q8EMC3 Vi polysaccharide biosynthesis from Oceanobacillus iheyensis (437 aa). FASTA: opt: 1817 Z-score: 2048.6 E(): 2.9e-106 Smith-Waterman score: 1817; 59.268 identity in 437 aa overlap
SNP338941	1515135	409522	T	A	K	N	polar, hydrophilic, charged(+)	polar, hydrophilic, neutral	Non-Conservative	Petrosino [12]	FTT1464c	dTDP-glucose 4,6-dehydratase	wbtA	complement	1514715	1516451	4.2.1.46	Similar to Q9S4V4 PglF from Campylobacter jejuni (590 aa). FASTA: opt: 1343 Z-score: 1435.9 E(): 3.9e-72 Smith-Waterman score: 1378; 43.543identity in 604 aa overlap
SNP31618	1528042	614744	T	C	S	P	polar, hydrophilic, neutral	hydrophobic, neutral	Non-Conservative	Petrosino [12]	FTT1475	Galactose-1-phosphate uridylyltransferase	galT	template	1527544	1528569	2.7.7.12	Similar to Q9CM11 Galactose-1-phosphate uridylyltransferase from Pasteurella multocida (348 aa). FASTA: opt: 1312 Z-score: 1558.0 E(): 6.2e-79 Smith-Waterman score: 1312; 56.231identity in 329 aa overlap
SNP280769	1528863	613923	A	G	I	V	aliphatic, hydrophobic, neutral	aliphatic, hydrophobic, neutral	Conservative	Petrosino [12]	FTT1476	Galactokinase	galK	template	1528572	1529720	2.7.1.6	Similar to GAL1_ACTPL Galactokinase from Actinobacillus pleuropneumoniae (384 aa) FASTA: opt: 959 Z-score: 1098.0 E(): 2.6e-53 Smith-Waterman score: 959; 38.710identity in 372 aa overlap
SNP101291	1530217	612569	T	C	K	R	polar, hydrophilic, charged(+)	polar, hydrophilic, charged(+)	Conservative	Petrosino [12]	FTT1478c	3-deoxy-D-manno-octulosonate cytidyltransferase	kdsB	complement	1530105	1530857	2.7.7.38	Similar to AAO90028 (Q83E52) 3-deoxy-D-manno-octulosonate cytidyltransferase from Coxiella burnetti (249 aa). FASTA: opt: 828 Z-score: 927.9 E(): 7.8e-44 Smith-Waterman score: 828; 52.033 identity in 246 aa overlap
SNP46917	1530604	612182	C	G	S	T	polar, hydrophilic, neutral	polar, hydrophilic, neutral	Conservative	Petrosino [12]	FTT1478c	3-deoxy-D-manno-octulosonate cytidyltransferase	kdsB	complement	1530105	1530857	2.7.7.38	Similar to AAO90028 (Q83E52) 3-deoxy-D-manno-octulosonate cytidyltransferase from Coxiella burnetti (249 aa). FASTA: opt: 828 Z-score: 927.9 E(): 7.8e-44 Smith-Waterman score: 828; 52.033 identity in 246 aa overlap
SNP349938	1530680	612106	T	C	K	E	polar, hydrophilic, charged(+)	polar, hydrophilic, charged(-)	Non-Conservative	Petrosino [12]	FTT1478c	3-deoxy-D-manno-octulosonate cytidyltransferase	kdsB	complement	1530105	1530857	2.7.7.38	Similar to AAO90028 (Q83E52) 3-deoxy-D-manno-octulosonate cytidyltransferase from Coxiella burnetti (249 aa). FASTA: opt: 828 Z-score: 927.9 E(): 7.8e-44 Smith-Waterman score: 828; 52.033 identity in 246 aa overlap
SNP203266	1565845	757361	G	A	V	I	aliphatic, hydrophobic, neutral	aliphatic, hydrophobic, neutral	Conservative	Petrosino [12]	FTT1511	conserved hypothetical membrane protein	N\A	template	1565788	1566672		Similar to AAO90839 Membrane protein, putative from Coxiella burnetii (305 aa). FASTA: opt: 693 Z-score: 824.9 E(): 4.3e-38 Smith-Waterman score: 693; 38.776 identity in 294 aa overlap. ORF ftt1511
SNP319660	1566262	756944	G	A	V	I	aliphatic, hydrophobic, neutral	aliphatic, hydrophobic, neutral	Conservative	Petrosino [12]	FTT1511	conserved hypothetical membrane protein	N\A	template	1565788	1566672		Similar to AAO90839 Membrane protein, putative from Coxiella burnetii (305 aa). FASTA: opt: 693 Z-score: 824.9 E(): 4.3e-38 Smith-Waterman score: 693; 38.776 identity in 294 aa overlap. ORF ftt1511
SNP186390	1614231	370131	T	C	I	V	aliphatic, hydrophobic, neutral	aliphatic, hydrophobic, neutral	Conservative	Petrosino [12]	FTT1553c	Ribonuclease R	rnr	complement	1614025	1616322	3.1.-.-	Similar to Q8EAG7 Ribonuclease R from (808 aa). FASTA: opt: 1840 Z-score: 1989.4 E(): 5.9e-103 Smith-Waterman score: 1863; 41.602 identity in 774 aa overlap
SNP137448	1615431	368931	C	T	V	I	aliphatic, hydrophobic, neutral	aliphatic, hydrophobic, neutral	Conservative	Petrosino [12]	FTT1553c	Ribonuclease R	rnr	complement	1614025	1616322	3.1.-.-	Similar to Q8EAG7 Ribonuclease R from (808 aa). FASTA: opt: 1840 Z-score: 1989.4 E(): 5.9e-103 Smith-Waterman score: 1863; 41.602 identity in 774 aa overlap
SNP48951	1615460	368902	T	C	K	R	polar, hydrophilic, charged(+)	polar, hydrophilic, charged(+)	Conservative	Petrosino [12]	FTT1553c	Ribonuclease R	rnr	complement	1614025	1616322	3.1.-.-	Similar to Q8EAG7 Ribonuclease R from (808 aa). FASTA: opt: 1840 Z-score: 1989.4 E(): 5.9e-103 Smith-Waterman score: 1863; 41.602 identity in 774 aa overlap
SNP101393	1616040	368322	T	C	T	A	polar, hydrophilic, neutral	aliphatic, hydrophobic, neutral	Non-Conservative	Petrosino [12]	FTT1553c	Ribonuclease R	rnr	complement	1614025	1616322	3.1.-.-	Similar to Q8EAG7 Ribonuclease R from (808 aa). FASTA: opt: 1840 Z-score: 1989.4 E(): 5.9e-103 Smith-Waterman score: 1863; 41.602 identity in 774 aa overlap
SNP155954	1618084	366278	C	T	R	K	polar, hydrophilic, charged(+)	polar, hydrophilic, charged(+)	Conservative	Petrosino [12]	FTT1556c	signal peptidase I	lepB	complement	1617909	1618772	3.4.21.89	Similar to AAO90612 9 83CL5) Signal peptidase I from Coxiella burnetii (259 aa). FASTA: opt: 716 Z-score: 839.6 E(): 6.5e-39 Smith-Waterman score: 717; 39.416 identity in 274 aa overlap
SNP222965	1633004	351389	T	A	Q	L	polar, hydrophilic, neutral	aliphatic, hydrophobic, neutral	Non-Conservative	Petrosino [12]	FTT1571c	UDP-3-O-[3-hydroxymyristoyl] glucosamine N-acyltransferase	lpxD	complement	1632082	1633095	2.3.1.-	Similar to Q83DT0 UDP-3-O-[3-hydroxymyristoyl] glucosamine N-acyltransferase from Coxiella burnetii (342 aa). FASTA: opt: 1026 Z-score: 1121.9 E(): 1.2e-54 Smith-Waterman score: 1024; 47.041 identity in 338 aa overlap paralog of FTT0286
SNP361410	1656478	313009	T	C	N	S	polar, hydrophilic, neutral	polar, hydrophilic, neutral	Conservative	Petrosino [12]	FTT1592c	Chitinase, fragment	N\A	complement	1655865	1657025		Similar to Q9ZNL0 Chitinase A from Clostridium paraputrificum (832 aa). FASTA: opt: 196 Z-score: 216.1 E(): 0.00035 Smith-Waterman score: 203; 22.770identity in 426 aa overlap ORF ftt1592c
SNP330411	1681767	302656	C	T	L	F	aliphatic, hydrophobic, neutral	aromatic, hydrophobic, neutral	Non-Conservative	Petrosino [12]	FTT1617	Adenine-specific methylase, HemK family	hemK	template	1680888	1681832	2.1.1.-	Similar to Q87MM8 Putative adenine-specific methylase from Vibrio parahaemolyticus (310 aa). FASTA: opt: 1066 Z-score: 1250.0 E(): 8.9e-62 Smith-Waterman score: 1066; 47.368 identity in 304 aa overlap
SNP210406	1706832	277272	C	T	A	T	aliphatic, hydrophobic, neutral	polar, hydrophilic, neutral	Non-Conservative	Petrosino [12]	FTT1641c	HsdR protein, fragment	hsdR2	complement	1706464	1707042	3.1.21.3	Similar to Q8RN28 HsdR from Campylobacter jejuni (1031 aa). FASTA: 647 Z-score: 728.9 E(): 9.4e-33 Smith-Waterman score: 649; 57.222 identity in 180 aa overlap. No start codon due to truncation at N-terminal according to FASTA hits. FTT1641c also has a partial match to Q8RN31 (110-360 aa). Potential deletion between FTT1641c and FTT1642c
SNP349303	1752580	1813797	T	C	N	D	polar, hydrophilic, neutral	polar, hydrophilic, charged(-)	Non-Conservative	Petrosino [12]	FTT1683c	major facilitator superfamily (MFS) transport protein	N\A	complement	1752569	1753720		Similar to Q8NM37 Permeases of the major facilitator superfamily from Corynebacterium glutamicum (398 aa). FASTA: opt: 440 z-score: 489.8 E(): 2e-19 Smith-Waterman score: 440; 24.211 identity in 380 aa overlap ORF ftt1683c
SNP135554	1752679	1813698	T	C	T	A	polar, hydrophilic, neutral	aliphatic, hydrophobic, neutral	Non-Conservative	Petrosino [12]	FTT1683c	major facilitator superfamily (MFS) transport protein	N\A	complement	1752569	1753720		Similar to Q8NM37 Permeases of the major facilitator superfamily from Corynebacterium glutamicum (398 aa). FASTA: opt: 440 z-score: 489.8 E(): 2e-19 Smith-Waterman score: 440; 24.211 identity in 380 aa overlap ORF ftt1683c
SNP163893	1764441	272906	A	G	T	A	polar, hydrophilic, neutral	aliphatic, hydrophobic, neutral	Non-Conservative	Petrosino [12]	FTT1696	Chaperone protein, groEL	groL	template	1764306	1765940	1.3.1.-	Similar to CH60_FRATU (P94798) 60 kDa chaperonin (protein Cpn60) from Francisella tularensis ssp. holarctica strain LVS (544 aa). FASTA: opt: 3359 Z-score: 3417.9 E(): 1.6e-182 99.265 identity in 544 aa overlap
SNP315843	1765276	272071	A	T	Q	L	polar, hydrophilic, neutral	aliphatic, hydrophobic, neutral	Non-Conservative	Petrosino [12]	FTT1696	Chaperone protein, groEL	groL	template	1764306	1765940	1.3.1.-	Similar to CH60_FRATU (P94798) 60 kDa chaperonin (protein Cpn60) from Francisella tularensis ssp. holarctica strain LVS (544 aa). FASTA: opt: 3359 Z-score: 3417.9 E(): 1.6e-182 99.265 identity in 544 aa overlap
SNP217183	1765617	271730	T	C	Y	H	aromatic, hydrophobic, polar	aromatic, polar, hydrophilic, charged(+)	Non-Conservative	Petrosino [12]	FTT1696	Chaperone protein, groEL	groL	template	1764306	1765940	1.3.1.-	Similar to CH60_FRATU (P94798) 60 kDa chaperonin (protein Cpn60) from Francisella tularensis ssp. holarctica strain LVS (544 aa). FASTA: opt: 3359 Z-score: 3417.9 E(): 1.6e-182 99.265 identity in 544 aa overlap
SNP163604	1765937	271410	G	A	M	I	hydrophobic, neutral	aliphatic, hydrophobic, neutral	Non-Conservative	Petrosino [12]	FTT1696	Chaperone protein, groEL	groL	template	1764306	1765940	1.3.1.-	Similar to CH60_FRATU (P94798) 60 kDa chaperonin (protein Cpn60) from Francisella tularensis ssp. holarctica strain LVS (544 aa). FASTA: opt: 3359 Z-score: 3417.9 E(): 1.6e-182 99.265 identity in 544 aa overlap
SNP284509	1774810	53984	G	A	V	I	aliphatic, hydrophobic, neutral	aliphatic, hydrophobic, neutral	Conservative	Petrosino [12]	FTT1699	hypothetical protein	pdpA1	template	1773304	1775766		Similar to AAP58968.1 (Q7X3I9) PdpA from Francisella novicida (820 aa). BLAST Score = 1545 bits (4000), Expect = 0.0 Identities = 777/820 (94), Positives = 787/820 (95). Identical to FTT1344. It is part of the duplicated region 1767715..1801625 which is identical to 1374371..1408281
SNP265812	1776188	52606	A	G	N	D	polar, hydrophilic, neutral	polar, hydrophilic, charged(-)	Non-Conservative	Petrosino [12]	FTT1700	hypothetical protein	pdpB1	template	1775771	1779052		Similar to AAP58967.1 (Q7X3J0) PdpB from Francisella novicida (1093 aa). BLAST Score = 1914 bits (4959), Expect = 0.0 Identities = 975/1093 (89),Positives = 988/1093 (90). This protein is identical to FTT1345. It is part of the duplicated region 1767715..1801625 which is identical to 1374371..140828
SNP120634	1776462	52332	G	T	W	L	aromatic, hydrophobic, neutral	aliphatic, hydrophobic, neutral	Non-Conservative	Petrosino [12]	FTT1700	hypothetical protein	pdpB1	template	1775771	1779052		Similar to AAP58967.1 (Q7X3J0) PdpB from Francisella novicida (1093 aa). BLAST Score = 1914 bits (4959), Expect = 0.0 Identities = 975/1093 (89),Positives = 988/1093 (90). This protein is identical to FTT1345. It is part of the duplicated region 1767715..1801625 which is identical to 1374371..140828
SNP113924	1777006	51788	G	T	K	N	polar, hydrophilic, charged(+)	polar, hydrophilic, neutral	Non-Conservative	Petrosino [12]	FTT1700	hypothetical protein	pdpB1	template	1775771	1779052		Similar to AAP58967.1 (Q7X3J0) PdpB from Francisella novicida (1093 aa). BLAST Score = 1914 bits (4959), Expect = 0.0 Identities = 975/1093 (89),Positives = 988/1093 (90). This protein is identical to FTT1345. It is part of the duplicated region 1767715..1801625 which is identical to 1374371..140828
SNP197512	1777718	51076	A	G	I	V	aliphatic, hydrophobic, neutral	aliphatic, hydrophobic, neutral	Conservative	Petrosino [12]	FTT1700	hypothetical protein	pdpB1	template	1775771	1779052		Similar to AAP58967.1 (Q7X3J0) PdpB from Francisella novicida (1093 aa). BLAST Score = 1914 bits (4959), Expect = 0.0 Identities = 975/1093 (89),Positives = 988/1093 (90). This protein is identical to FTT1345. It is part of the duplicated region 1767715..1801625 which is identical to 1374371..140828
SNP30952	1777733	51061	G	A	D	N	polar, hydrophilic, charged(-)	polar, hydrophilic, neutral	Non-Conservative	Petrosino [12]	FTT1700	hypothetical protein	pdpB1	template	1775771	1779052		Similar to AAP58967.1 (Q7X3J0) PdpB from Francisella novicida (1093 aa). BLAST Score = 1914 bits (4959), Expect = 0.0 Identities = 975/1093 (89),Positives = 988/1093 (90). This protein is identical to FTT1345. It is part of the duplicated region 1767715..1801625 which is identical to 1374371..140828
SNP142167	1806912	87592	C	T	V	M	aliphatic, hydrophobic, neutral	hydrophobic, neutral	Non-Conservative	Petrosino [12]	FTT1721c	Amidophosphoribosyltransferase	purF	complement	1805989	1807479	2.4.2.14	Similar Q8ZNC2 Amidophosphoribosyltransferase from Salmonella typhimurium (505 aa). FASTA: opt: 1866 Z-score: 2060.2 E(): 6.7e-107 Smith-Waterman score: 1866; 57.320identity in 485 aa overlap
SNP57026	1809876	84628	T	C	I	V	aliphatic, hydrophobic, neutral	aliphatic, hydrophobic, neutral	Conservative	Petrosino [12]	FTT1724c	outer membrane protein tolC precursor	tolC	complement	1809580	1811109		Similar to TOLC_ECOLI (P02930) Outer membrane protein tolC precursor from E. coli (495 aa). FASTA: opt: 548 Z-score: 649.7 E(): 2.7e-28 Smith-Waterman score: 548; 28.000 identity in 425 aa overlap
SNP42971	1857785	15021	A	G	I	T	aliphatic, hydrophobic, neutral	polar, hydrophilic, neutral	Non-Conservative	Petrosino [12]	FTT1769c	ClpB protein	clpB	complement	1857772	1860351		Similar to FASTA: AAO89660 (Q83F55) ClpB protein from Coxiella burnetii (859 aa). FASTA: opt: 3593 Z-score: 3223.6 E(): 1.1e-171 Smith-Waterman score: 3593; 65.357 identity in 840 aa overlap
SNP27172	1857956	14850	C	T	G	E	aliphatic, neutral	polar, hydrophilic, charged(-)	Non-Conservative	Petrosino [12]	FTT1769c	ClpB protein	clpB	complement	1857772	1860351		Similar to FASTA: AAO89660 (Q83F55) ClpB protein from Coxiella burnetii (859 aa). FASTA: opt: 3593 Z-score: 3223.6 E(): 1.1e-171 Smith-Waterman score: 3593; 65.357 identity in 840 aa overlap
SNP326385	1858311	14495	C	T	V	I	aliphatic, hydrophobic, neutral	aliphatic, hydrophobic, neutral	Conservative	Petrosino [12]	FTT1769c	ClpB protein	clpB	complement	1857772	1860351		Similar to FASTA: AAO89660 (Q83F55) ClpB protein from Coxiella burnetii (859 aa). FASTA: opt: 3593 Z-score: 3223.6 E(): 1.1e-171 Smith-Waterman score: 3593; 65.357 identity in 840 aa overlap
SNP257156	1868315	4491	G	T	Q	H	polar, hydrophilic, neutral	aromatic, polar, hydrophilic, charged(+)	Non-Conservative	Petrosino [12]	FTT1779	conserved hypothetical membrane, pseudogene	N\A	template	1868190	1868711		Similar to AAO91223 (Q83AZ7) Membrane protein, putative, from Coxiella burnetii (205 aa). FASTA: opt: 303 Z-score: 367.4 E(): 1.3e-12 Smith-Waterman score: 303; 29.299identity in 157 aa overlap. Contains a frameshift after aa 149. This CDS is disrupted by the insertion of an ISFtu1 element occurring near the C-terminal end. ORF ftt1779
SNP138963	1868398	4408	G	A	G	E	aliphatic, neutral	polar, hydrophilic, charged(-)	Non-Conservative	Petrosino [12]	FTT1779	conserved hypothetical membrane, pseudogene	N\A	template	1868190	1868711		Similar to AAO91223 (Q83AZ7) Membrane protein, putative, from Coxiella burnetii (205 aa). FASTA: opt: 303 Z-score: 367.4 E(): 1.3e-12 Smith-Waterman score: 303; 29.299identity in 157 aa overlap. Contains a frameshift after aa 149. This CDS is disrupted by the insertion of an ISFtu1 element occurring near the C-terminal end. ORF ftt1779
SNP349189	1868590	4216	G	T	G	V	aliphatic, neutral	aliphatic, hydrophobic, neutral	Non-Conservative	Petrosino [12]	FTT1779	conserved hypothetical membrane, pseudogene	N\A	template	1868190	1868711		Similar to AAO91223 (Q83AZ7) Membrane protein, putative, from Coxiella burnetii (205 aa). FASTA: opt: 303 Z-score: 367.4 E(): 1.3e-12 Smith-Waterman score: 303; 29.299identity in 157 aa overlap. Contains a frameshift after aa 149. This CDS is disrupted by the insertion of an ISFtu1 element occurring near the C-terminal end. ORF ftt1779
SNP209683	1874478	1880704	G	C	D	H	polar, hydrophilic, charged(-)	aromatic, polar, hydrophilic, charged(+)	Non-Conservative	Petrosino [12]	FTT1786	conserved hypothetical, pseudogene	N\A	template	1874256	1874747		Similar to O86705 Hypothetical protein SCO6523 from Streptomyces coelicolour (346 aa). FASTA: opt: 659 Z-score: 775.4 E(): 2.5e-35 Smith-Waterman score: 659; 37.262 identity in 263 aa overlap. Contains a frameshift after aa 165. Truncation at N-terminus according to FASTA hits ORF ftt1786
SNP126000	1885513	1891137	C	A	G	C	aliphatic, neutral	polar, hydrophobic, neutral	Non-Conservative	Petrosino [12]	FTT1797c	peptide methionine sulfoxide reductase msrA	msrA2	complement	1884926	1885615	1.8.4.6	Similar to MSA2_CAUCR (Q9A9E9) Peptide methionine sulfoxide reductase from Caulobacter crescentus (196 aa). FASTA opt: 510 Z-score: 598.2 E(): 2e-25 Smith-Waterman score: 510; 39.024 identity in 205 aa overlap
SNP171669	7204	1872213	T	G	D	E	polar, hydrophilic, charged(-)	polar, hydrophilic, charged(-)	Conservative	Twine [19]	FTT0007	Aspartyl-tRNA synthetase	aspS	template	6044	7822	6.1.1.12	Similar to SYD_ECOLI (P21889) Aspartyl-tRNA synthetase from E. coli (590 aa.) FASTA: opt: 2335 Z-score: 2790.0 E(): 1.6e-147 Smith-Waterman score: 2335; 58.853 identity in 593 aa overlap
SNP47305	7658	1871759	A	G	I	V	aliphatic, hydrophobic, neutral	aliphatic, hydrophobic, neutral	Conservative	Twine [19]	FTT0007	Aspartyl-tRNA synthetase	aspS	template	6044	7822	6.1.1.12	Similar to SYD_ECOLI (P21889) Aspartyl-tRNA synthetase from E. coli (590 aa.) FASTA: opt: 2335 Z-score: 2790.0 E(): 1.6e-147 Smith-Waterman score: 2335; 58.853 identity in 593 aa overlap
SNP162015	209681	1781687	G	C	G	A	aliphatic, neutral	aliphatic, hydrophobic, neutral	Non-Conservative	Twine [19]	FTT0192	Lysyl-tRNA synthetase	lysU	template	208813	210543	6.1.1.6	Similar to SYK2_ECOLI (P14825) Lysyl-tRNA synthetase, heat inducible, from E. coli (504 aa). FASTA: opt: 2003 Z-score: 2242.9 E(): 4.9e-117 Smith-Waterman score: 2003; 61.066 identity in 488 aa overlap
SNP163882	675270	1014884	G	A	A	T	aliphatic, hydrophobic, neutral	polar, hydrophilic, neutral	Non-Conservative	Twine [19]	FTT0655	hypothetical protein	N\A	template	674925	675671		Similar to YO32_SHEON (Q8EEF0) Hypothetical UPF0082 protein SO2432 from Shewanella oneidensis (248 aa). FASTA: opt: 1090 Z-score: 1308.8 E(): 5.2e-65 Smith-Waterman score: 1090; 64.516 identity in 248 aa overlap. ORF ftt0655
SNP98006	675619	1014535	A	G	N	S	polar, hydrophilic, neutral	polar, hydrophilic, neutral	Conservative	Twine [19]	FTT0655	hypothetical protein	N\A	template	674925	675671		Similar to YO32_SHEON (Q8EEF0) Hypothetical UPF0082 protein SO2432 from Shewanella oneidensis (248 aa). FASTA: opt: 1090 Z-score: 1308.8 E(): 5.2e-65 Smith-Waterman score: 1090; 64.516 identity in 248 aa overlap. ORF ftt0655
SNP85959	927977	1193431	A	C	Y	S	aromatic, hydrophobic, polar	polar, hydrophilic, neutral	Non-Conservative	Twine [19]	FTT0918	hypothetical protein	N\A	template	927667	929340		ORF ftt0918
SNP36912	929717	1191688	A	G	I	V	aliphatic, hydrophobic, neutral	aliphatic, hydrophobic, neutral	Conservative	Twine [19]	FTT0919	hypothetical protein	N\A	template	929357	930802		ORF ftt0919
SNP153987	700266	989875	A	G	Y	H	aromatic, hydrophobic, polar	aromatic, polar, hydrophilic, charged(+)	Non-Conservative	Type IV Pili [17]	FTT0683c	Type IV pili leader peptidase and methylase.	pilD	complement	700057	700875	3.4.23.43	Similar to Q888U2 Type IV pilus prepilin peptidase PilD from Pseudomonas syringae (pv. tomato) (290 aa). FASTA: opt: 784 Z-score: 898.0 E(): 4e-42 Smith-Waterman score: 784; 44.531identity in 256 aa overlap. Cleaves the leader peptide of the fiber building block proteins and methylates the resulting N-terminal residue.
SNP294153	871532	1249875	T	C	K	E	polar, hydrophilic, charged(+)	polar, hydrophilic, charged(-)	Non-Conservative	Type IV Pili [17]	FTT0861c	Type IV pili fiber building block protein	N\A	complement	871497	872090		Similar to FMA2_BACNO (P17824) Fimbrial protein precursor (Pilin) from Bacteroides nodosus (Dichelobacter nodosus) (160 aa). FASTA: opt: 169 Z-score: 222.1 E(): 0.00018 Smith-Waterman score: 169; 34.646 identity in 127 aa overlap The pili fiber building block protein has a highly distinct primary structure; a short positively charged leader sequence, and a highly conserved and highly hydrophobic …
SNP67433	897193	1224215	C	T	V	I	aliphatic, hydrophobic, neutral	aliphatic, hydrophobic, neutral	Conservative	Type IV Pili [17]	FTT0888c	Type IV pili fiber building block protein	N\A	complement	896762	897358		Similar to Q59607 Pilin precursor from Neisseria gonorrhoeae (169 aa). FASTA: opt: 244 Z-score: 305.7 E(): 3.5e-09 Smith-Waterman score: 244; 30.435 identity in 138 aa overlap. The pili fiber building block protein has a highly distinct primary structure; a short positively charged leader sequence, and a highly conserved and highly hydrophobic amino-terminal domain which forms the core of the pil…
SNP200083	898368	1223040	C	T	S	N	polar, hydrophilic, neutral	polar, hydrophilic, neutral	Conservative	Type IV Pili [17]	FTT0889c	Type IV pili fiber building block protein	N\A	complement	898028	898468		Similar to Q820M2 Fimbrial protein pilin:bacterial general secretion pathway protein H from Nitrosomonas europaea (136 aa). FASTA: opt: 216 Z-score: 280.1 E(): 1e-07 Smith-Waterman score: 218; 32.639 identity in 144 aa overlap. The pili fiber building block protein has a highly distinct primary structure; a short positively charged leader sequence, and a highly conserved and highly hydrophobic am…
SNP289947	1066831	928437	A	G	L	S	aliphatic, hydrophobic, neutral	polar, hydrophilic, neutral	Non-Conservative	Type IV Pili [17]	FTT1057c	Type IV pili lipoprotein	N\A	complement	1066089	1066994		Similar to Q9KRM4 Fimbrial biogenesis and twitching motility protein, putative from Vibrio cholerae (237 aa). FASTA: opt: 249 Z-score: 293.4 E(): 1.9e-08 Smith-Waterman score: 249; 25.346 identity in 217 aa overlap. Tetratrico peptide repeat (TPR) containing protein. Shows a weak similarity to the lipoprotein pilF (Pseudomonas) that has an N-terminal type II (lipoprotein) signal sequence, followe…
SNP236782	1147796	1108744	G	C	M	I	hydrophobic, neutral	aliphatic, hydrophobic, neutral	Non-Conservative	Type IV Pili [17]	FTT1134	Type IV pili polytopic inner membrane protein	pilC	template	1147014	1148243		Similar to Q888U1 Type IV pilus biogenesis protein PilC from Pseudomonas syringae (pv. tomato) (405 aa). FASTA: opt: 1017 Z-score: 1153.2 E(): 2.4e-56 Smith-Waterman score: 1017; 39.055identity in 402 aa overlap. Termed pilF in N. gonorrhoeae.
SNP282262	1169599	1130535	G	T	P	Q	hydrophobic, neutral	polar, hydrophilic, neutral	Non-Conservative	Type IV Pili [17]	FTT1156c	Type IV pilin multimeric outer membrane protein	pilQ	complement	1168800	1170584		Similar to Q8EK21 Type IV pilus biogenesis protein PilQ from Shewanella oneidensis (684 aa). FASTA: opt: 1014 Z-score: 1145.2 E(): 6.8e-56 Smith-Waterman score: 1014; 31.658 identity in 597 aa overlap. The nearest gene neighbours show similarity to pilN, pilO and pilP. Also required for type II protein secretion.
SNP137653	1169612	1130548	C	T	E	K	polar, hydrophilic, charged(-)	polar, hydrophilic, charged(+)	Non-Conservative	Type IV Pili [17]	FTT1156c	Type IV pilin multimeric outer membrane protein	pilQ	complement	1168800	1170584		Similar to Q8EK21 Type IV pilus biogenesis protein PilQ from Shewanella oneidensis (684 aa). FASTA: opt: 1014 Z-score: 1145.2 E(): 6.8e-56 Smith-Waterman score: 1014; 31.658 identity in 597 aa overlap. The nearest gene neighbours show similarity to pilN, pilO and pilP. Also required for type II protein secretion.
SNP49965	1169950	1130886	T	C	H	R	aromatic, polar, hydrophilic, charged(+)	polar, hydrophilic, charged(+)	Non-Conservative	Type IV Pili [17]	FTT1156c	Type IV pilin multimeric outer membrane protein	pilQ	complement	1168800	1170584		Similar to Q8EK21 Type IV pilus biogenesis protein PilQ from Shewanella oneidensis (684 aa). FASTA: opt: 1014 Z-score: 1145.2 E(): 6.8e-56 Smith-Waterman score: 1014; 31.658 identity in 597 aa overlap. The nearest gene neighbours show similarity to pilN, pilO and pilP. Also required for type II protein secretion.
SNP138359	1170173	1131109	T	C	K	E	polar, hydrophilic, charged(+)	polar, hydrophilic, charged(-)	Non-Conservative	Type IV Pili [17]	FTT1156c	Type IV pilin multimeric outer membrane protein	pilQ	complement	1168800	1170584		Similar to Q8EK21 Type IV pilus biogenesis protein PilQ from Shewanella oneidensis (684 aa). FASTA: opt: 1014 Z-score: 1145.2 E(): 6.8e-56 Smith-Waterman score: 1014; 31.658 identity in 597 aa overlap. The nearest gene neighbours show similarity to pilN, pilO and pilP. Also required for type II protein secretion.
SNP182275	1170248	1131184	A	C	Y	D	aromatic, hydrophobic, polar	polar, hydrophilic, charged(-)	Non-Conservative	Type IV Pili [17]	FTT1156c	Type IV pilin multimeric outer membrane protein	pilQ	complement	1168800	1170584		Similar to Q8EK21 Type IV pilus biogenesis protein PilQ from Shewanella oneidensis (684 aa). FASTA: opt: 1014 Z-score: 1145.2 E(): 6.8e-56 Smith-Waterman score: 1014; 31.658 identity in 597 aa overlap. The nearest gene neighbours show similarity to pilN, pilO and pilP. Also required for type II protein secretion.
SNP209320	1170538	1131474	T	C	D	G	polar, hydrophilic, charged(-)	aliphatic, neutral	Non-Conservative	Type IV Pili [17]	FTT1156c	Type IV pilin multimeric outer membrane protein	pilQ	complement	1168800	1170584		Similar to Q8EK21 Type IV pilus biogenesis protein PilQ from Shewanella oneidensis (684 aa). FASTA: opt: 1014 Z-score: 1145.2 E(): 6.8e-56 Smith-Waterman score: 1014; 31.658 identity in 597 aa overlap. The nearest gene neighbours show similarity to pilN, pilO and pilP. Also required for type II protein secretion.
SNP97108	1171314	1132250	G	A	A	V	aliphatic, hydrophobic, neutral	aliphatic, hydrophobic, neutral	Conservative	Type IV Pili [17]	FTT1158c	Type IV pili glycosylation protein	N\A	complement	1171193	1171789		Similar to Q8PH76 Fimbrial assembly membrane protein from Xanthomonas axonopodis (pv. citri) (221 aa). FASTA: opt: 144 Z-score: 177.4 E(): 0.055 Smith-Waterman score: 144; 25.946 identity in 185 aa overlap. Weak similarity to type IV pili glycosylation protein (pilO). The nearest gene neighbours show similarity to pilN, pilP and pilQ, which indicates that this protein could be pilO. PilO is requi…
SNP347103	1340423	1383562	A	C	S	A	polar, hydrophilic, neutral	aliphatic, hydrophobic, neutral	Non-Conservative	Type IV Pili [17]	FTT1314c	Type IV pili fiber building block protein	N\A	complement	1339893	1340477		Similar to Q8EBJ4 Type IV pilus biogenesis protein (164 aa). FASTA: opt: 157 Z-score: 204.8 E(): 0.0016 Smith-Waterman score: 157; 27.607 identity in 163 aa overlap. The pili fiber building block protein has a highly distinct primary structure; a short positively charged leader sequence, and a highly conserved and highly hydrophobic amino-terminal domain which forms the core of the pilus fiber; A…
